# Supplementary material
Source: PubMed Central journal article supplement (PMC3608412)

# Manipulating Micellar Environments for Enhancing Transition Metal-Catalyzed Cross-Couplings in Water at Room Temperature

Bruce H. Lipshutz,\* Subir Ghorai, Wendy Wen Yi Leong, and Benjamin R. Taft

Department of Chemistry & Biochemistry

University of California

Santa Barbara, CA 93106

lipshutz@chem.ucsb.edu

Daniel V. Krogstad

Materials Department

University of California

Santa Barbara, CA 93106

## Supporting Information

### Table of Contents

|     |                                                                                                           |        |
|-----|-----------------------------------------------------------------------------------------------------------|--------|
| I.  | General Information                                                                                       | S2     |
| II. | Spectral data ( $^1\text{H}$ and $^{13}\text{C}$ ) of all new and ( $^1\text{H}$ ) of all known compounds | S3-S63 |

**General Informationss:** All Reactions were performed either in a round bottom flask or 2-5 mL microwave reactor vials under an argon atmosphere containing a Teflon coated stir bar and septum. A stock solution of 2.5 and 5.0% (w/w) PTS in ultrapure degassed H<sub>2</sub>O were made and stored in a sealed serum bottle on the bench-top. Column chromatography was performed using 60 Å flash silica gel. Thin-Layer-Chromatography analysis was conducted using commercially available silica gel 60 F<sub>254</sub> plates. Nuclear Magnetic Resonance spectra were obtained in CDCl<sub>3</sub>, with proton and carbon resonances at 400 and 100 MHz, respectively, and are referenced to the residual solvent signal at 7.27 ppm for <sup>1</sup>H and δ 77.23 ppm for <sup>13</sup>C. Data for <sup>1</sup>H are reported as follows: chemical shift (δ ppm), multiplicity (s = singlet, d = doublet, t = triplet, q = quartet, m = multiplet, sep = septet), coupling constant and integration. Data for <sup>13</sup>C NMR are reported in terms of chemical shift. Infrared spectra were obtained either neat or by thin-film on NaCl plates and are reported as cm<sup>-1</sup>. All commercially available reagents were used without further purification. Grubbs second generation catalysts were stored in a glove box under an Ar atmosphere.

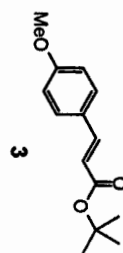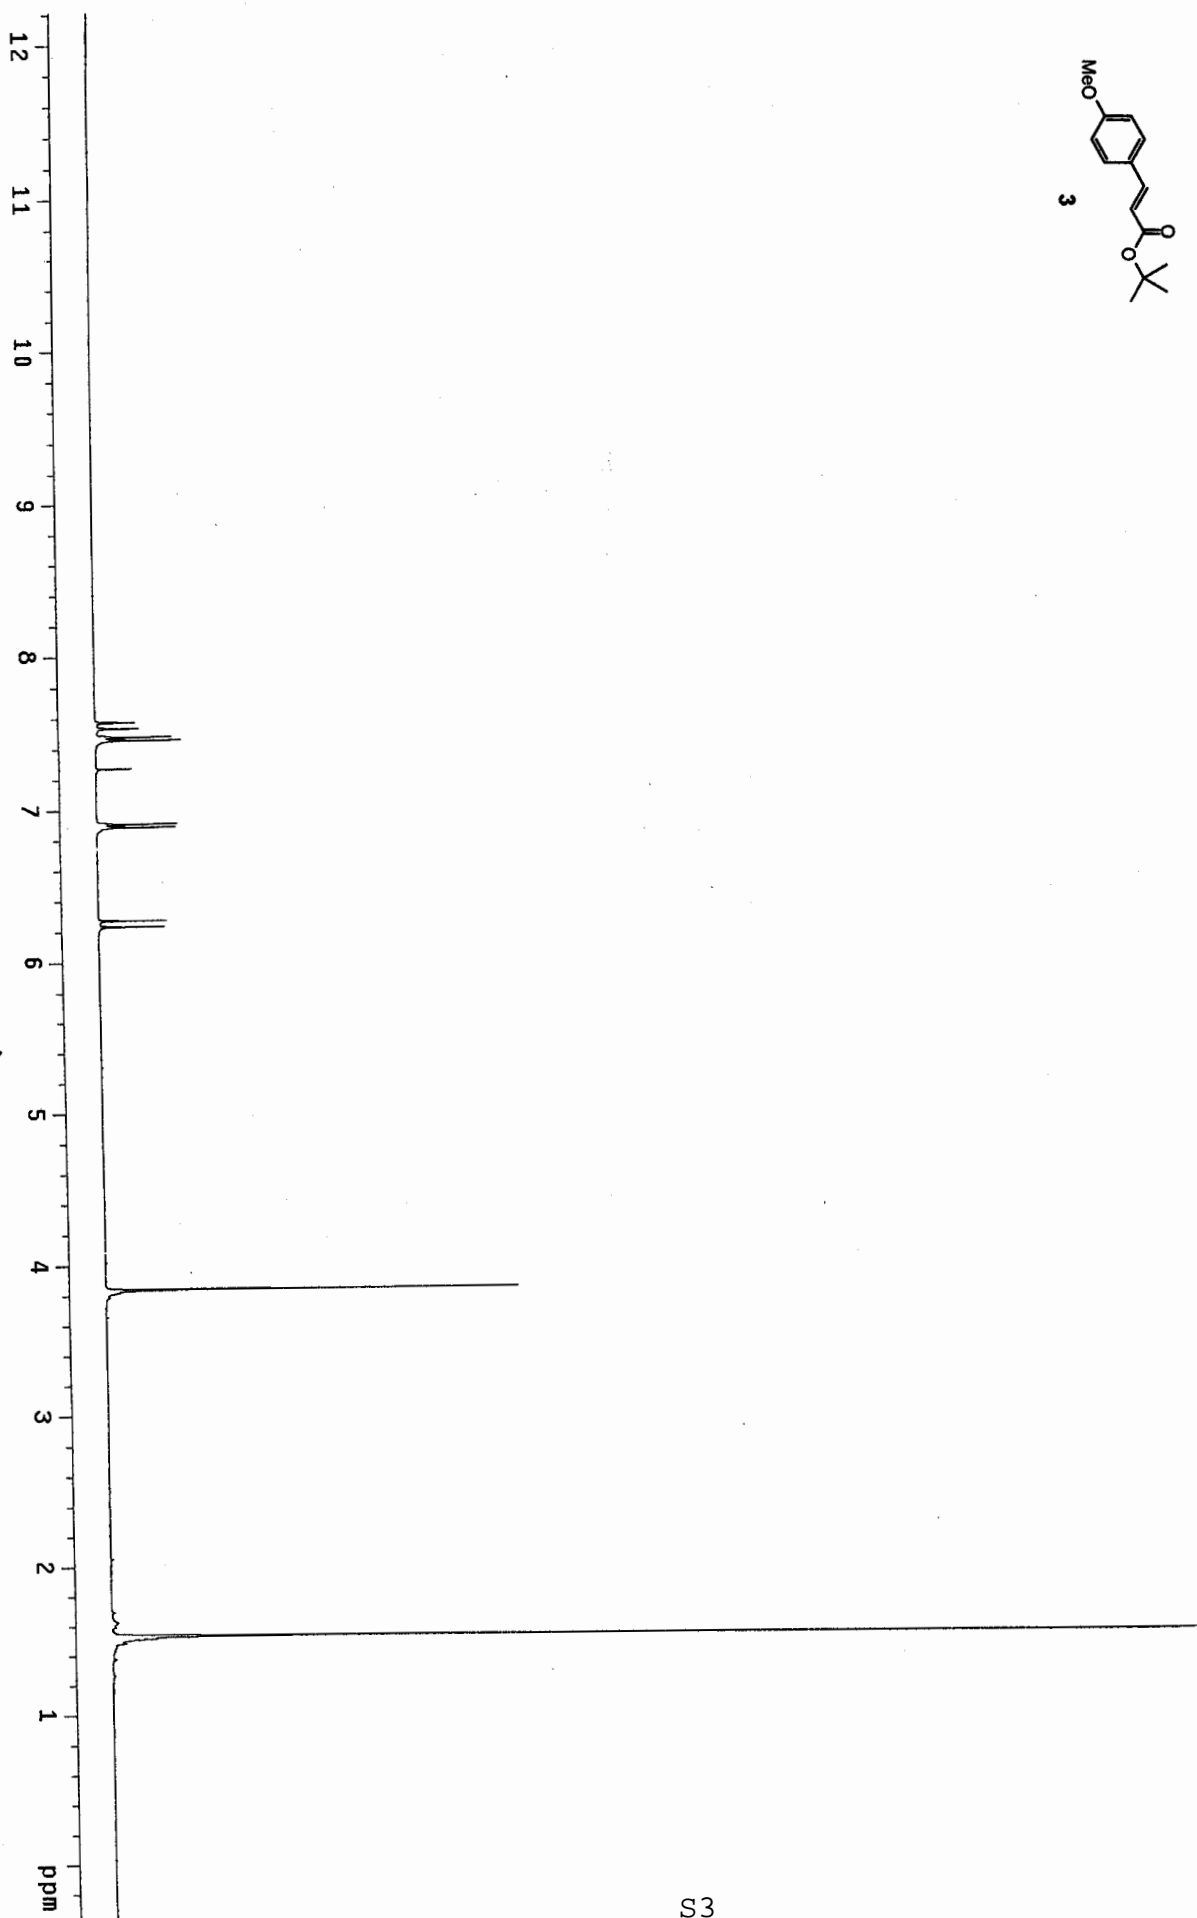

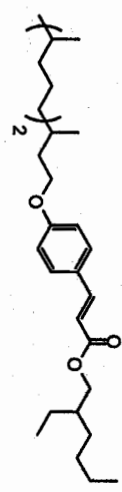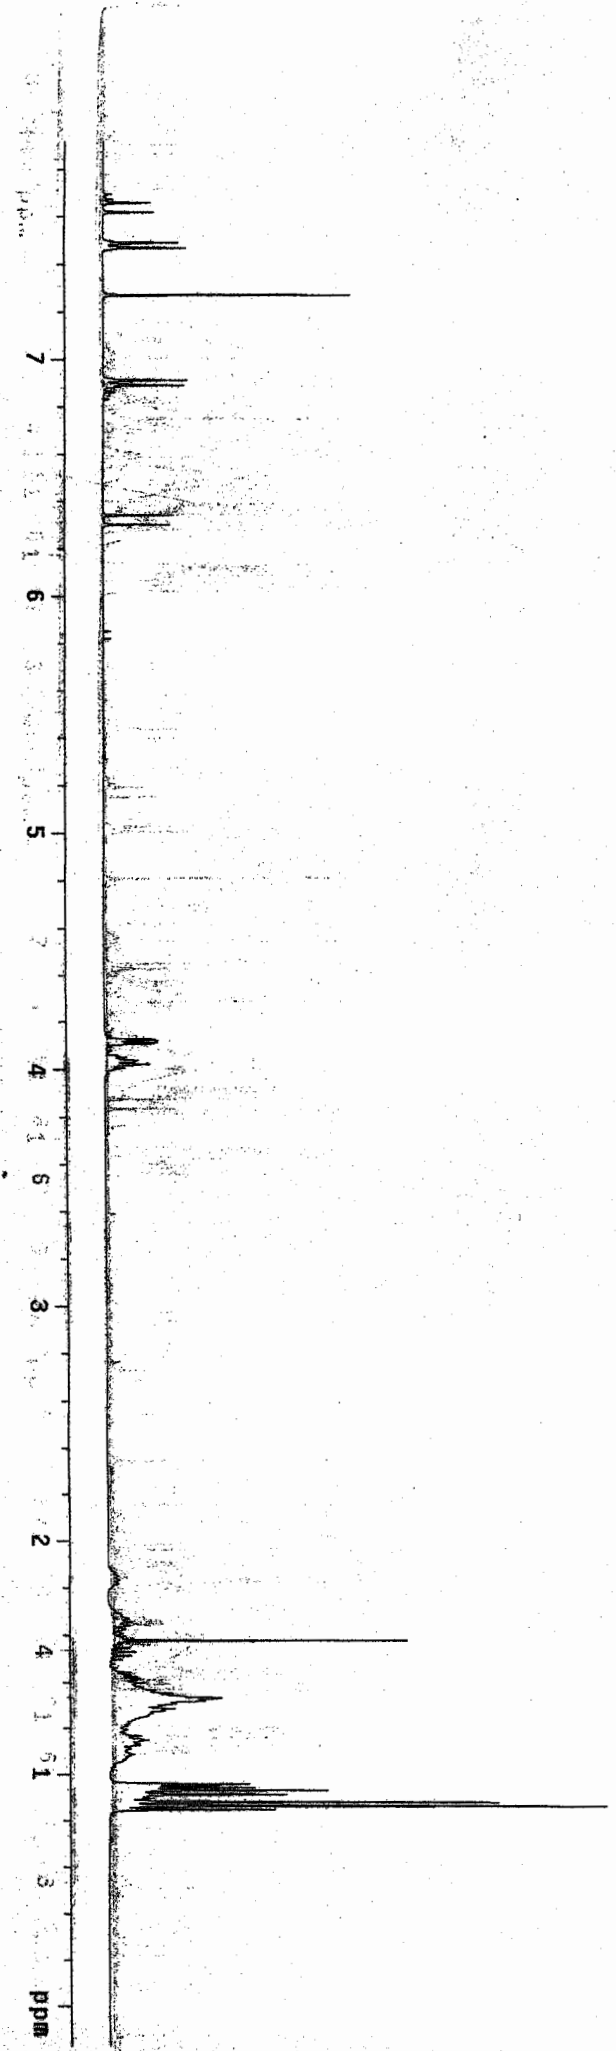

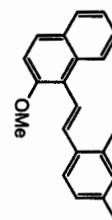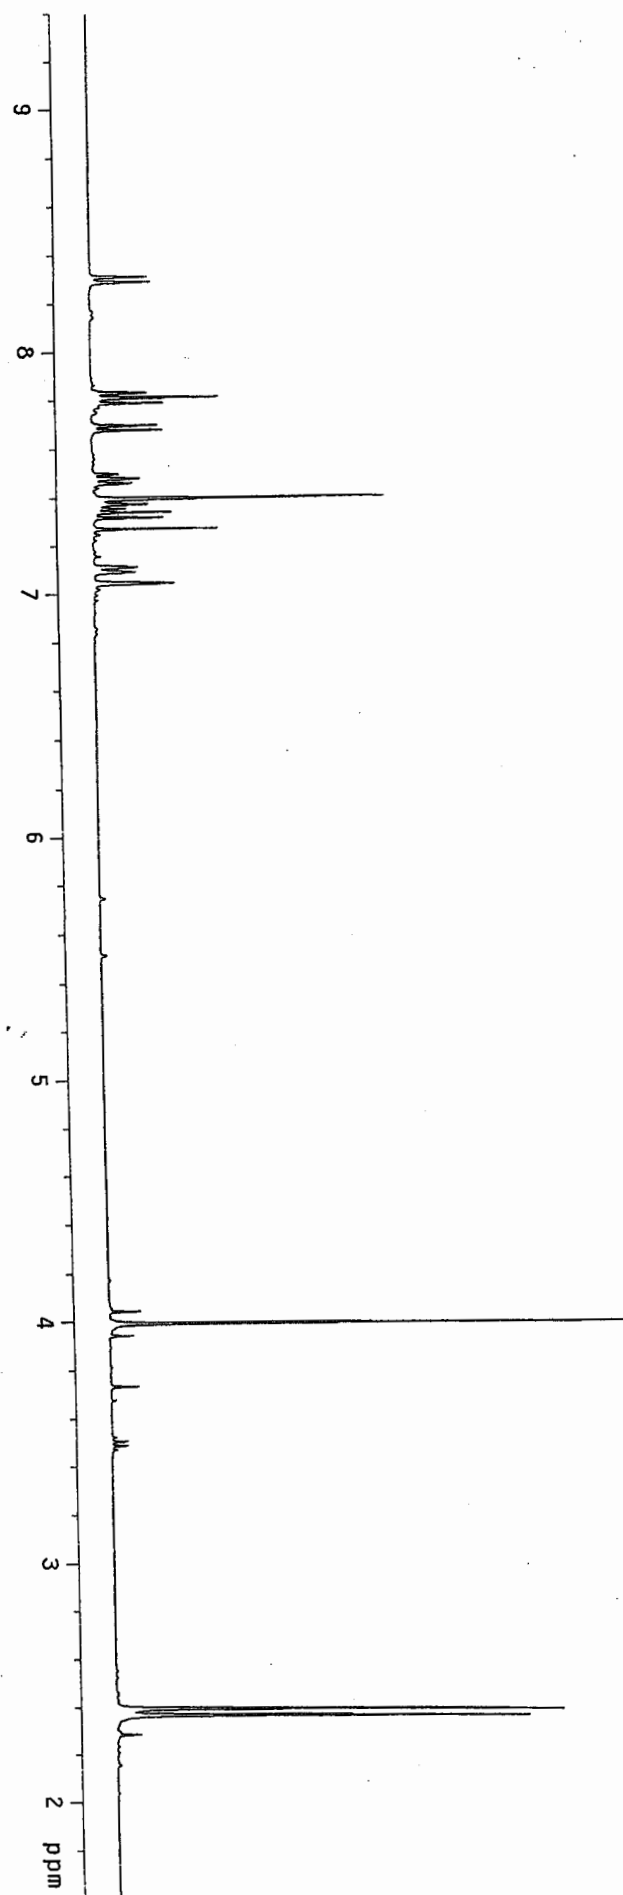

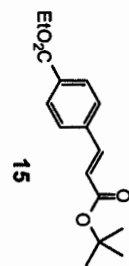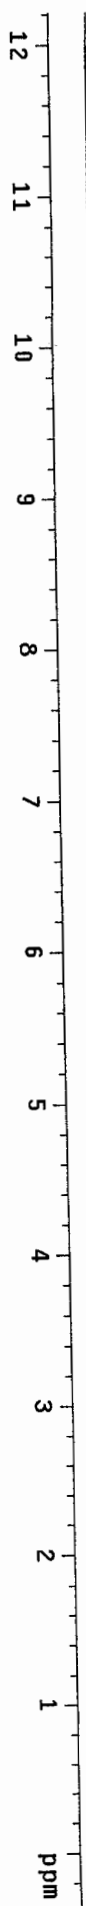

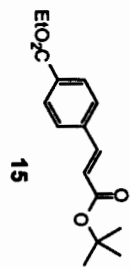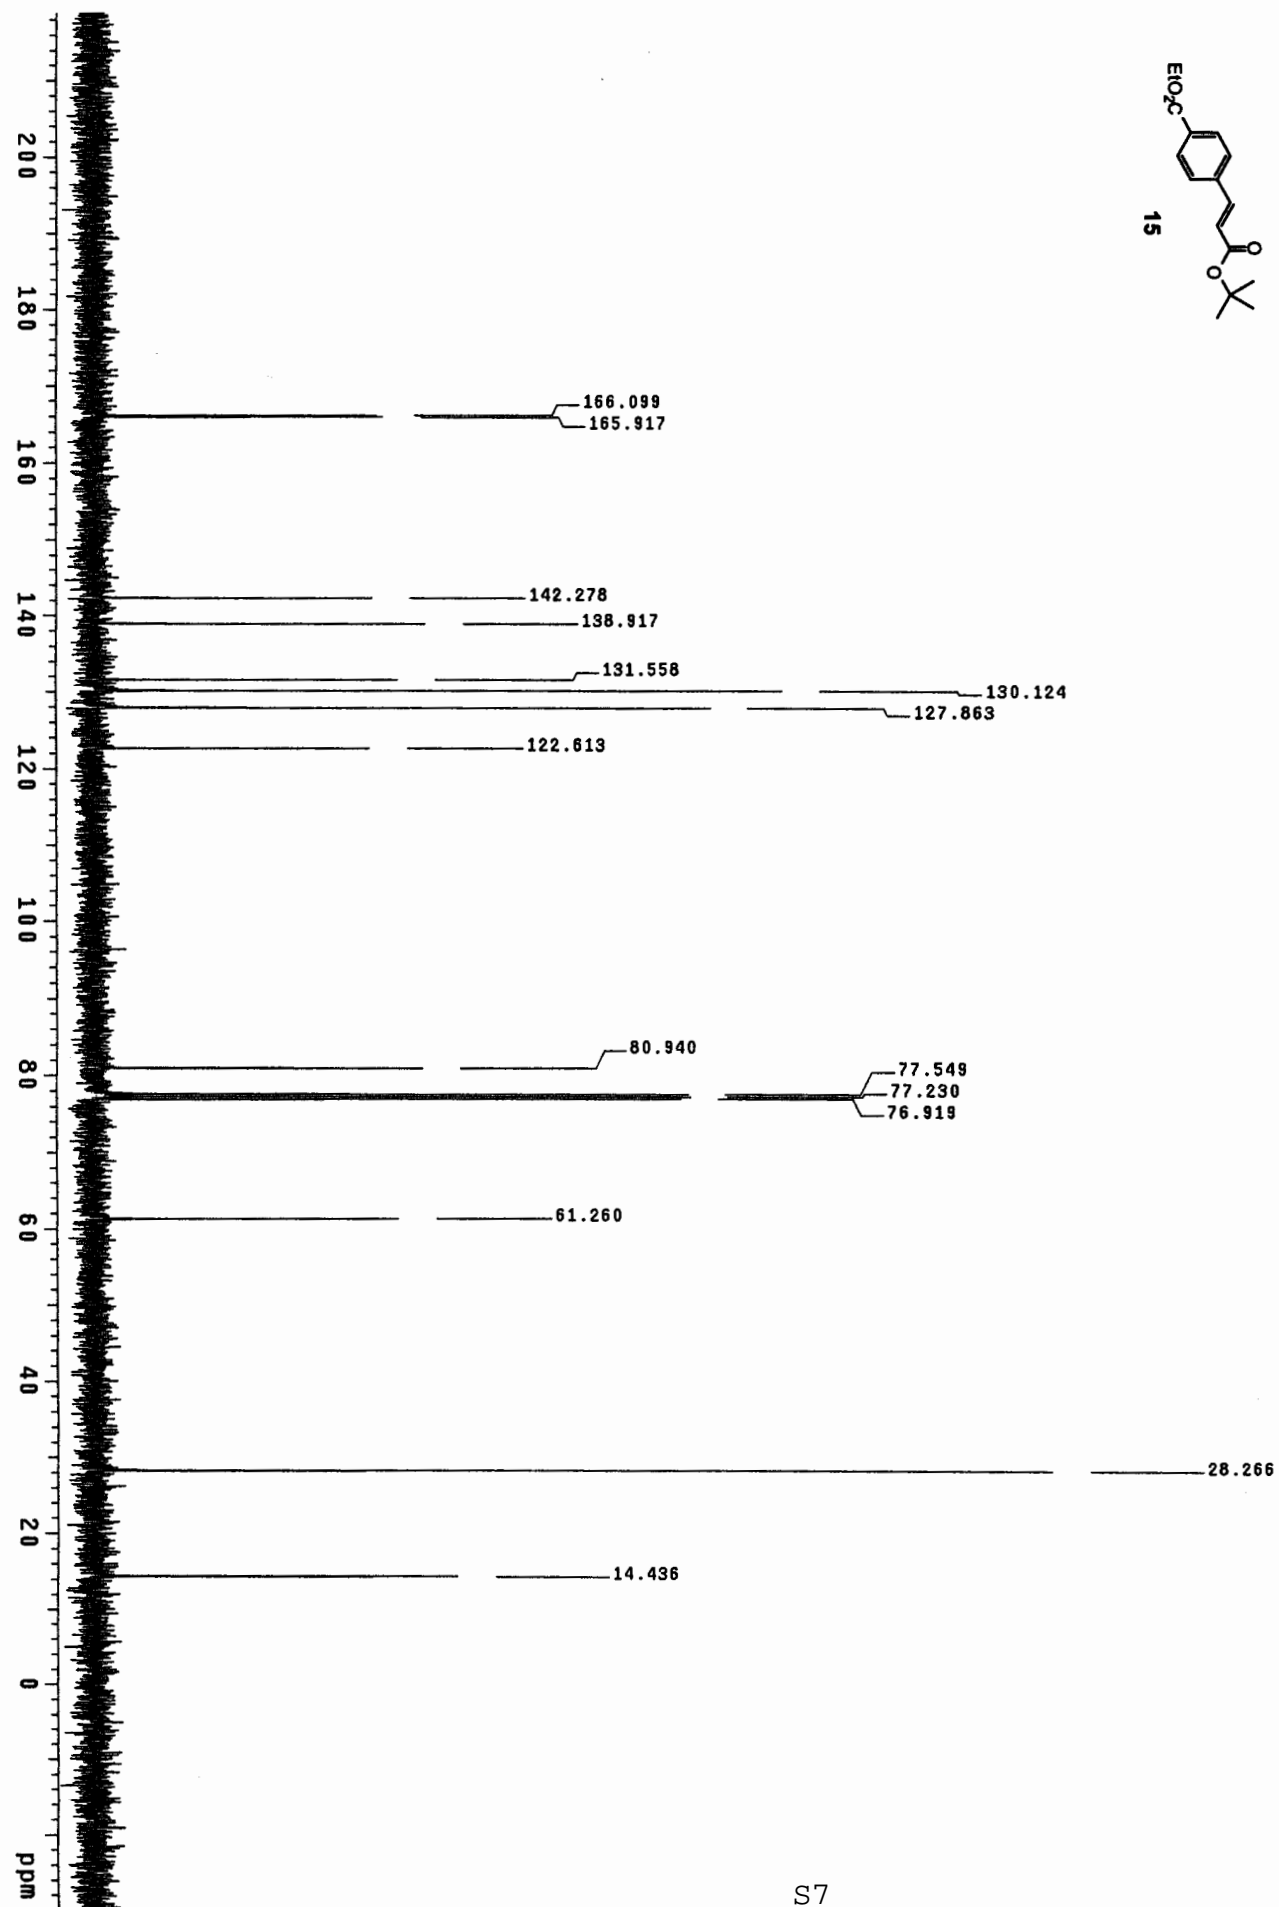

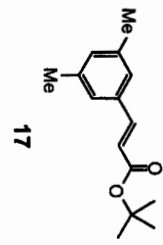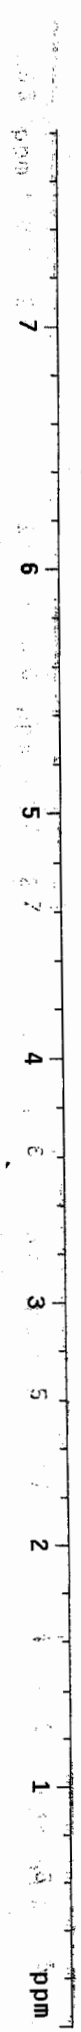



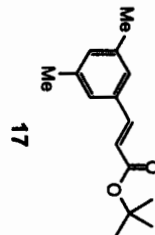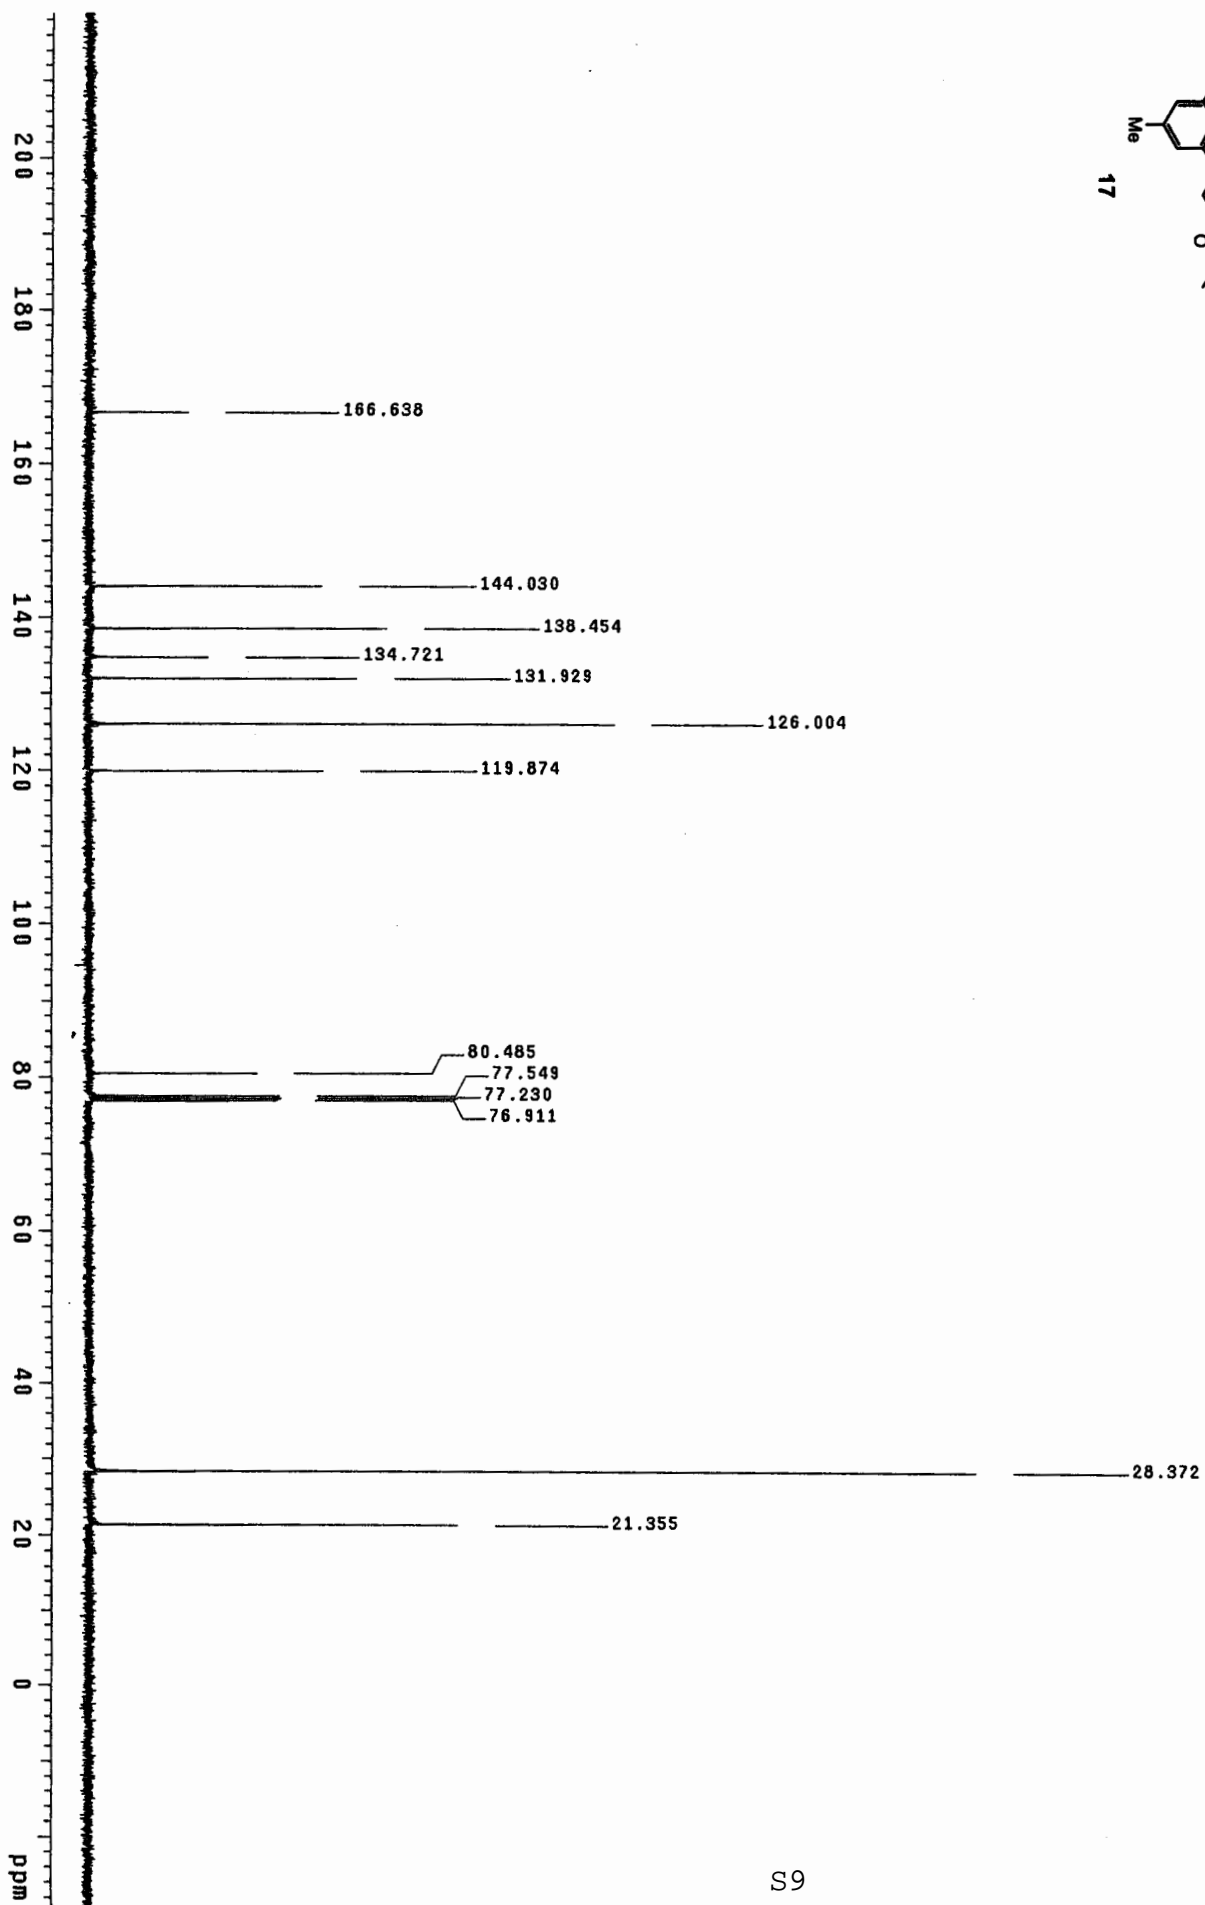

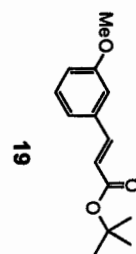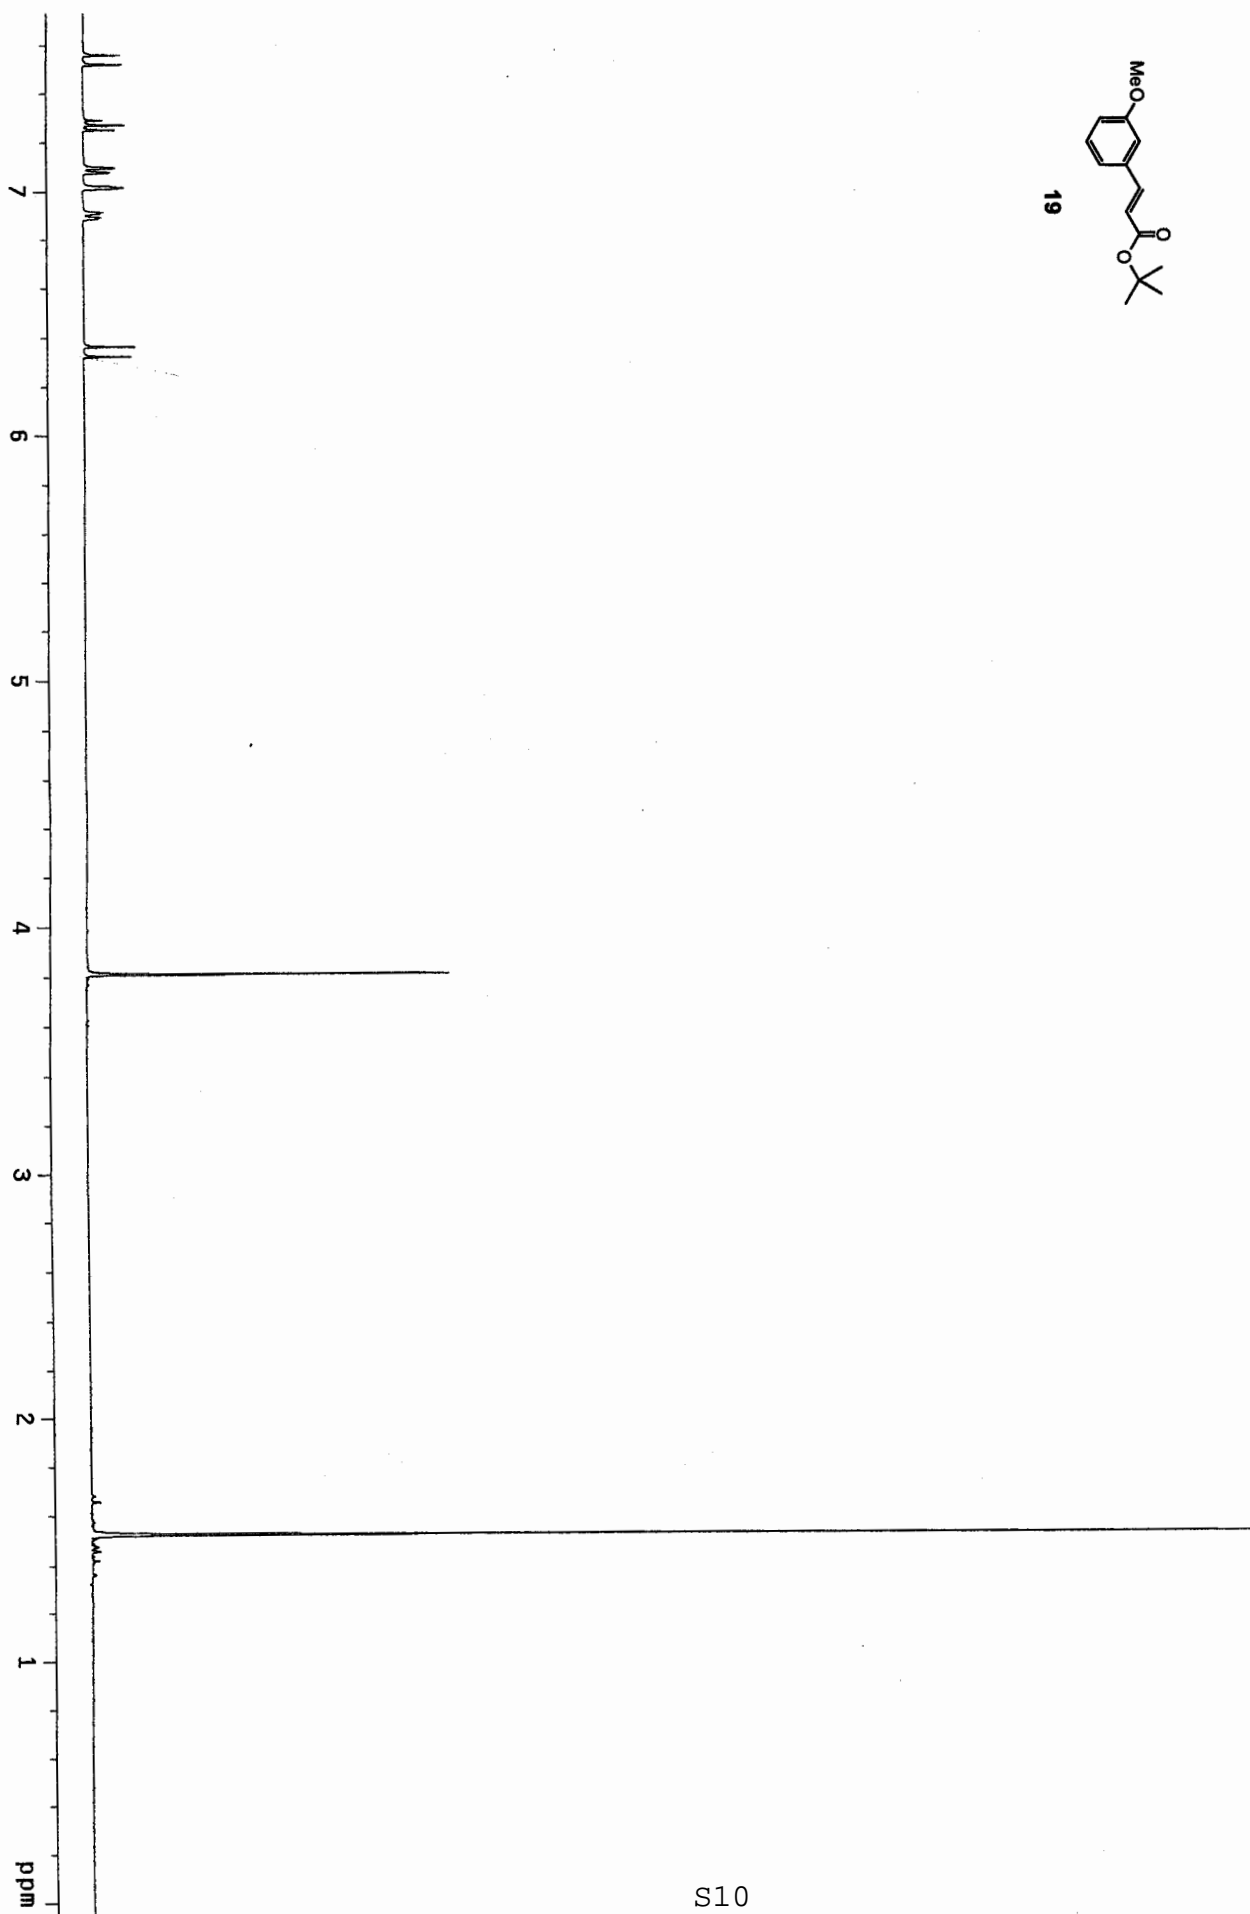

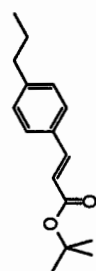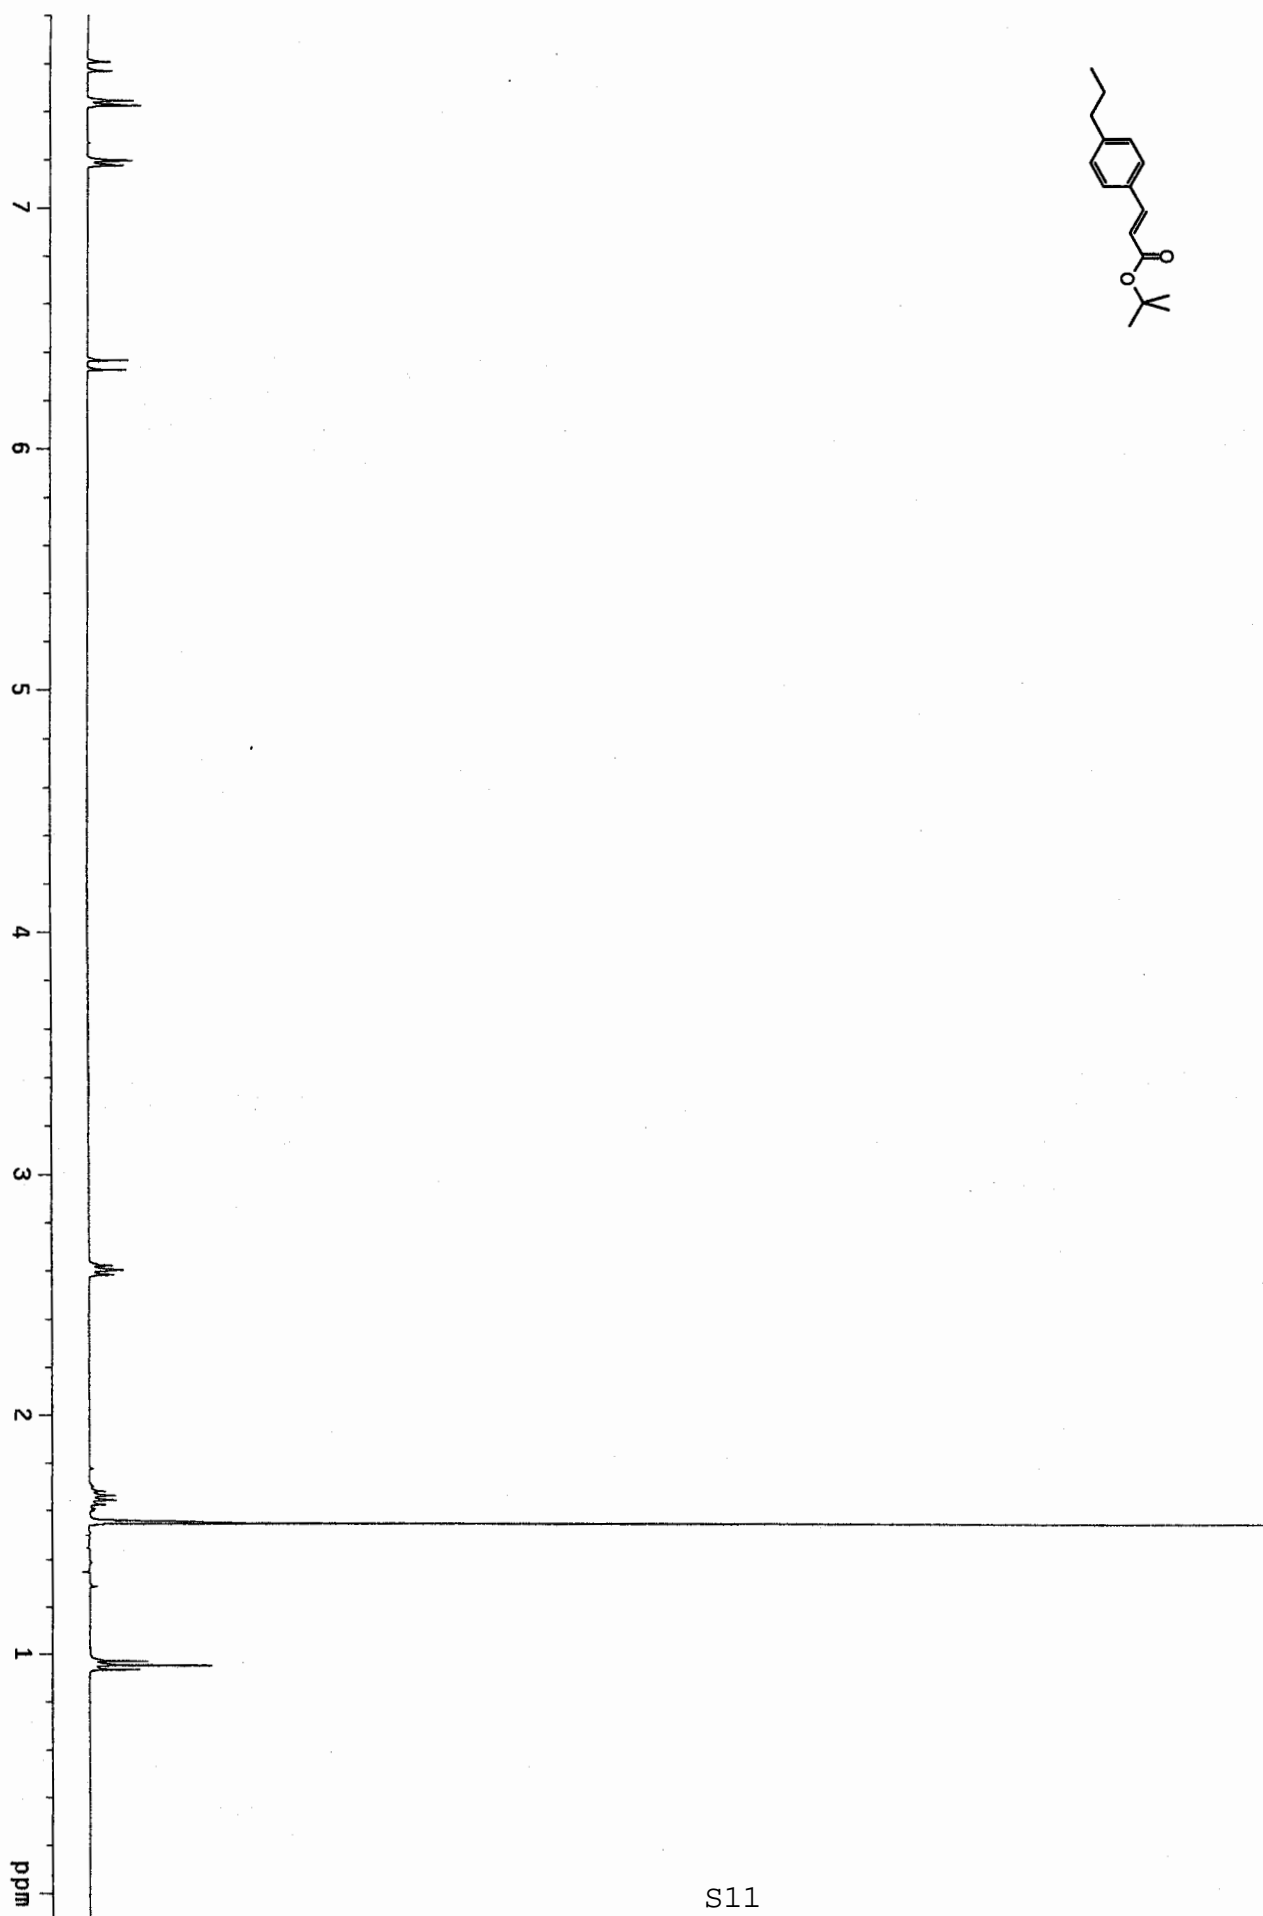

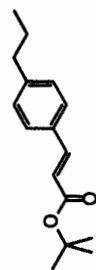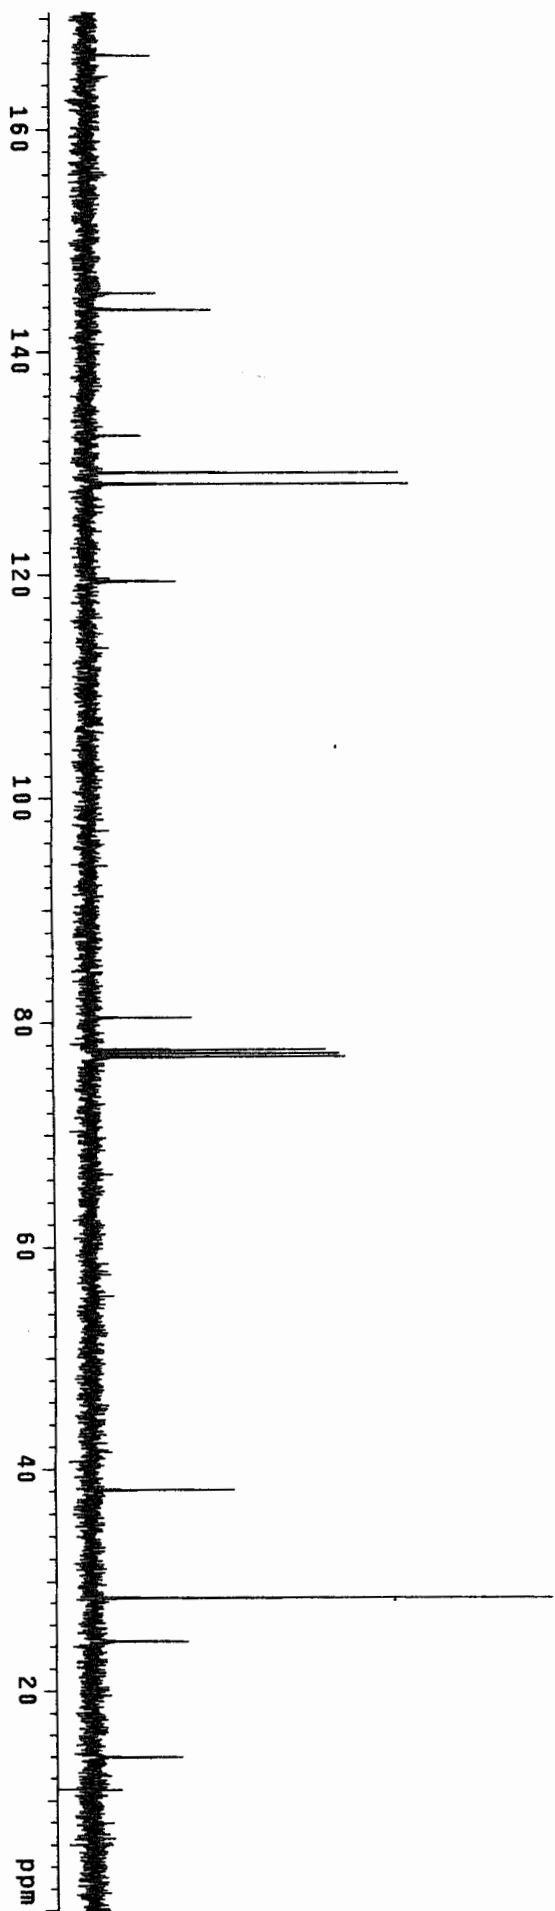

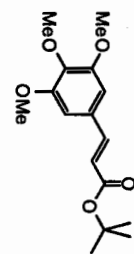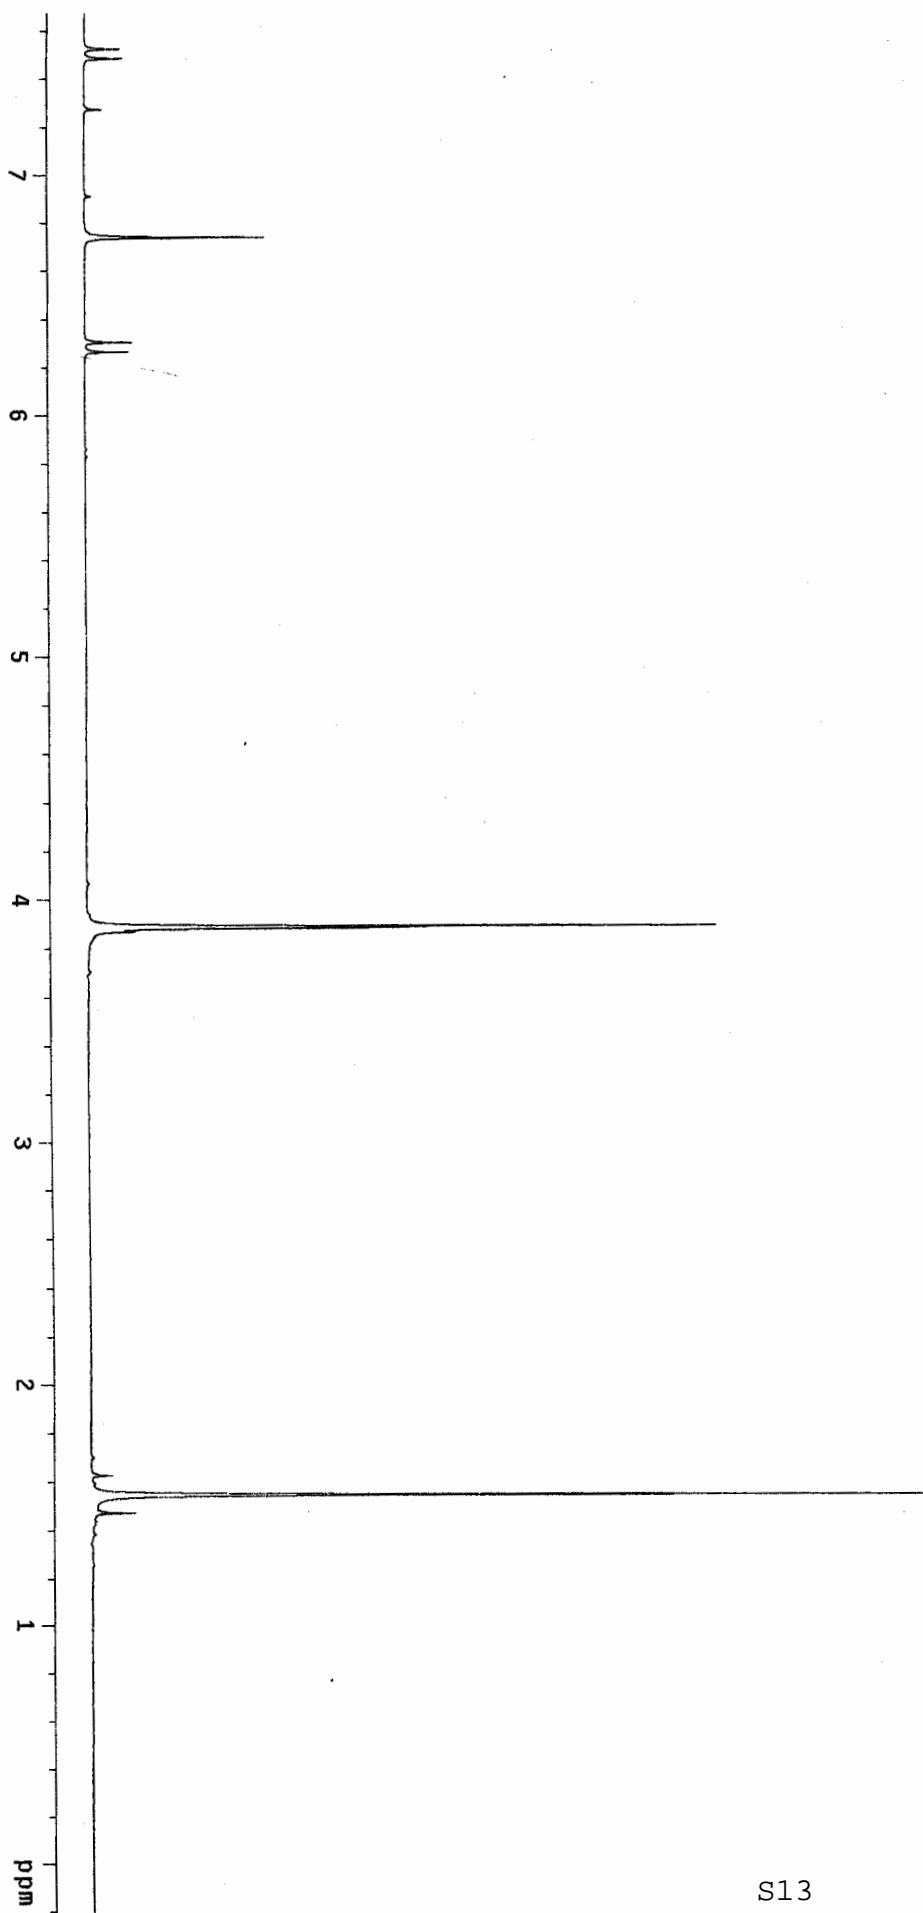

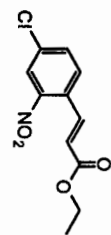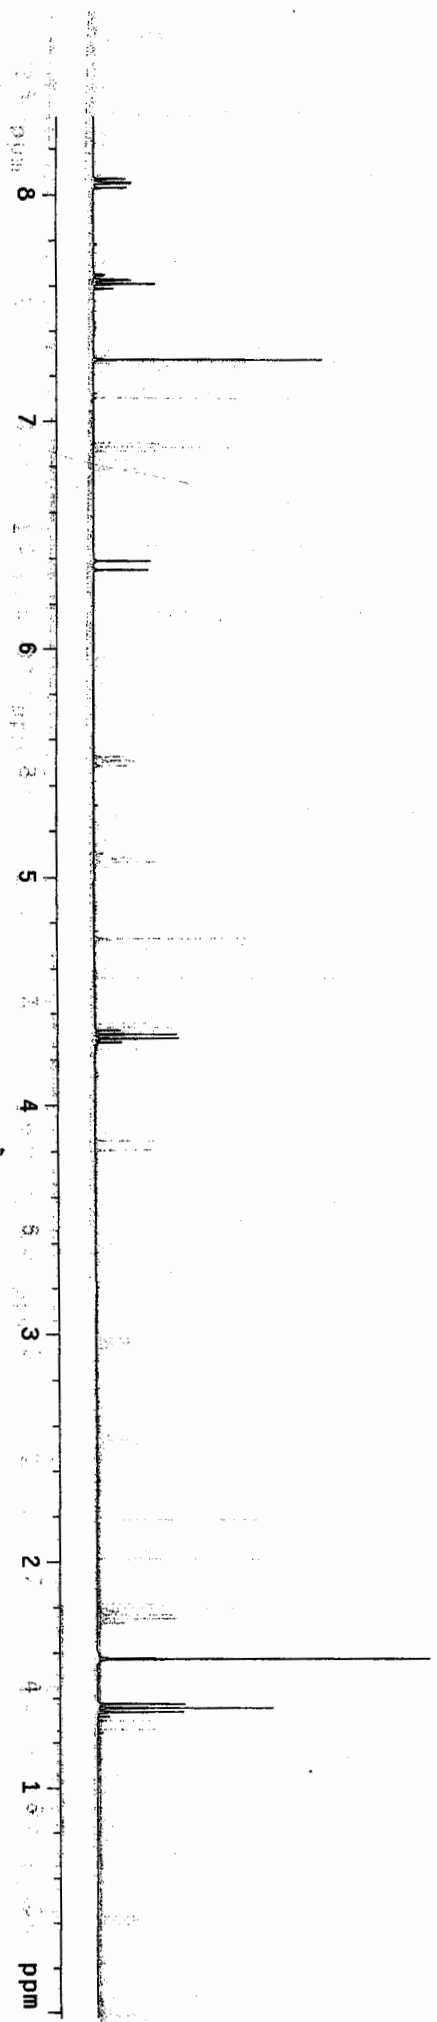

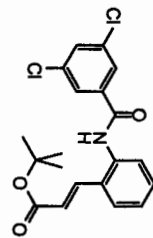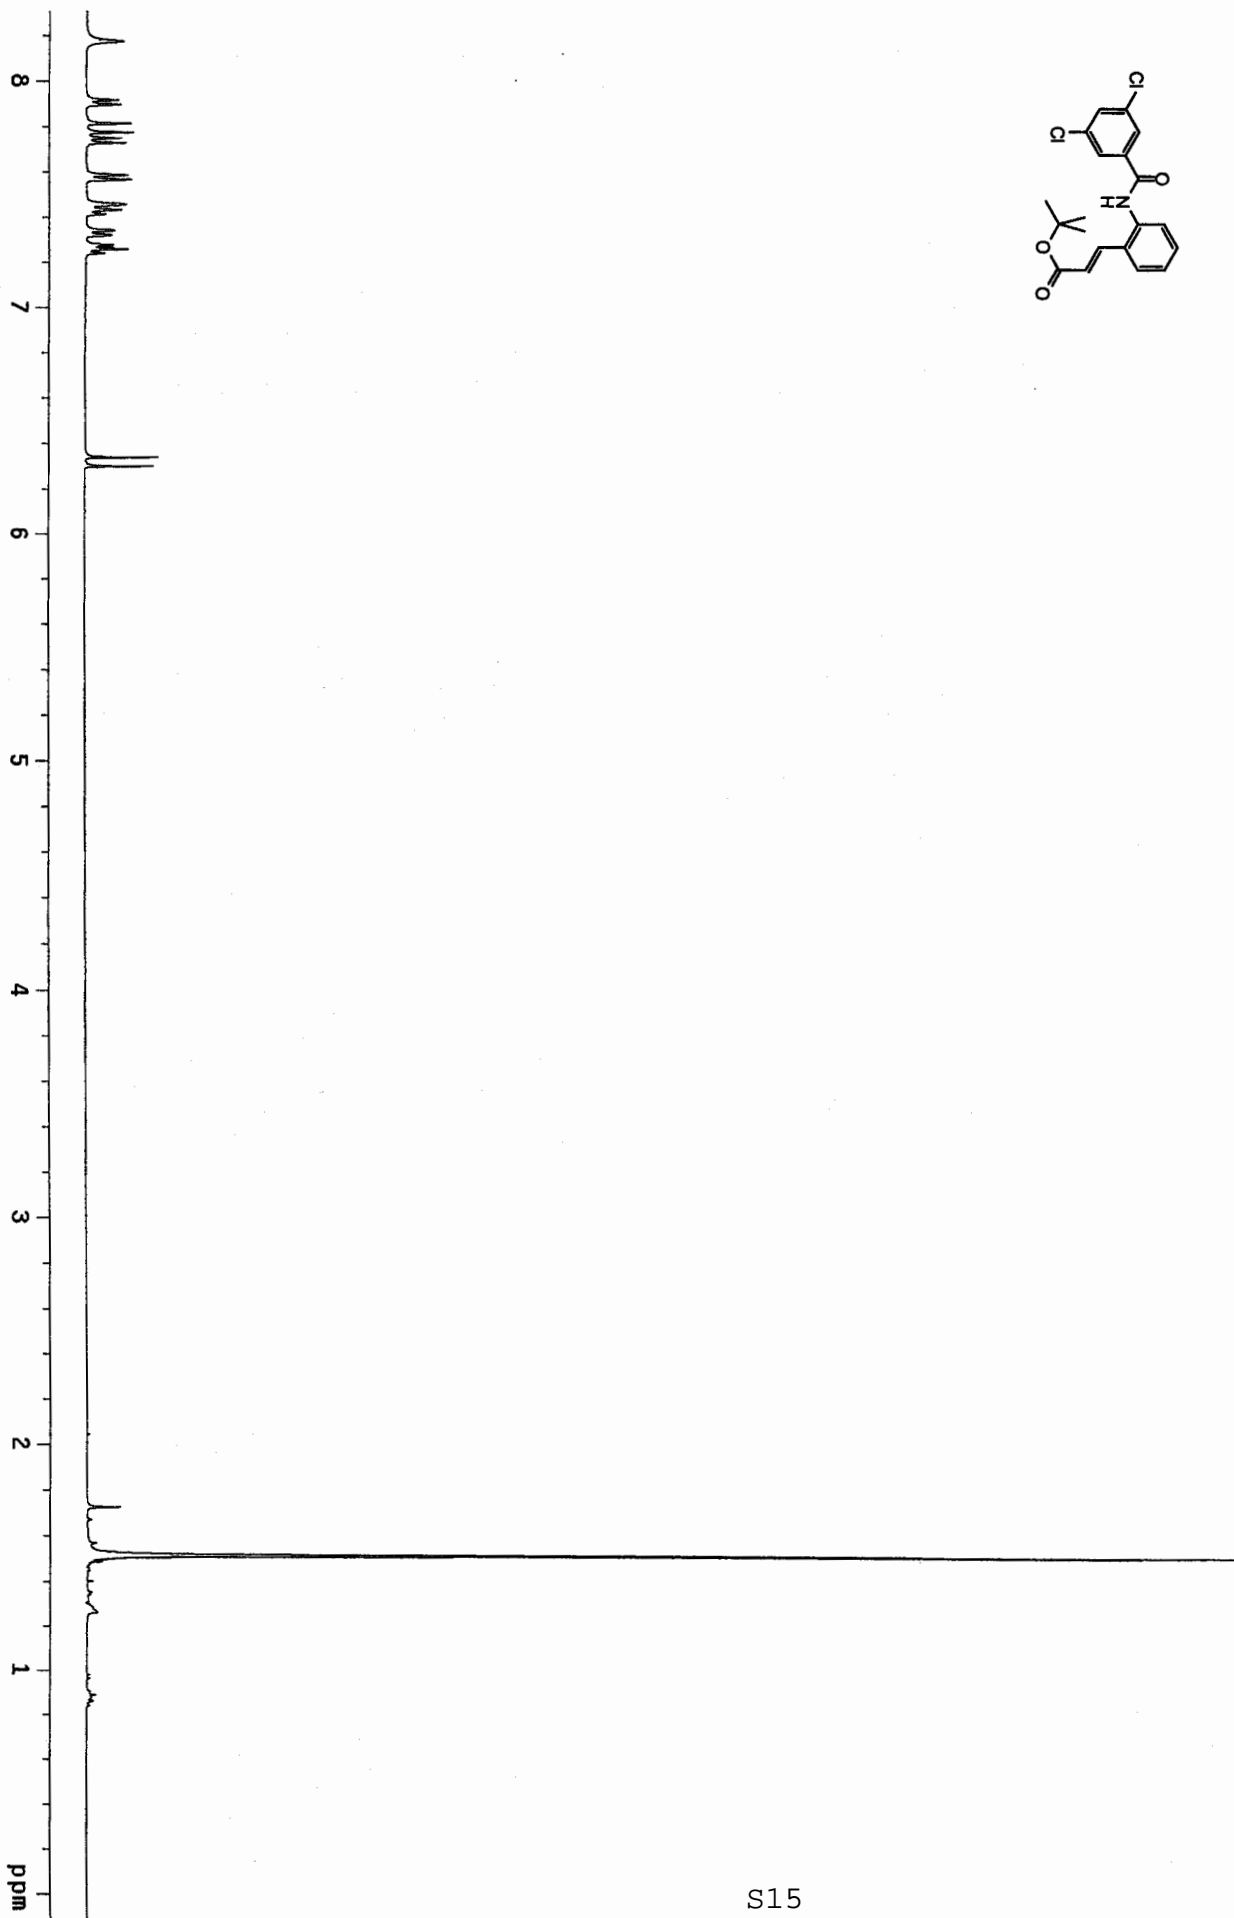

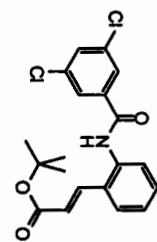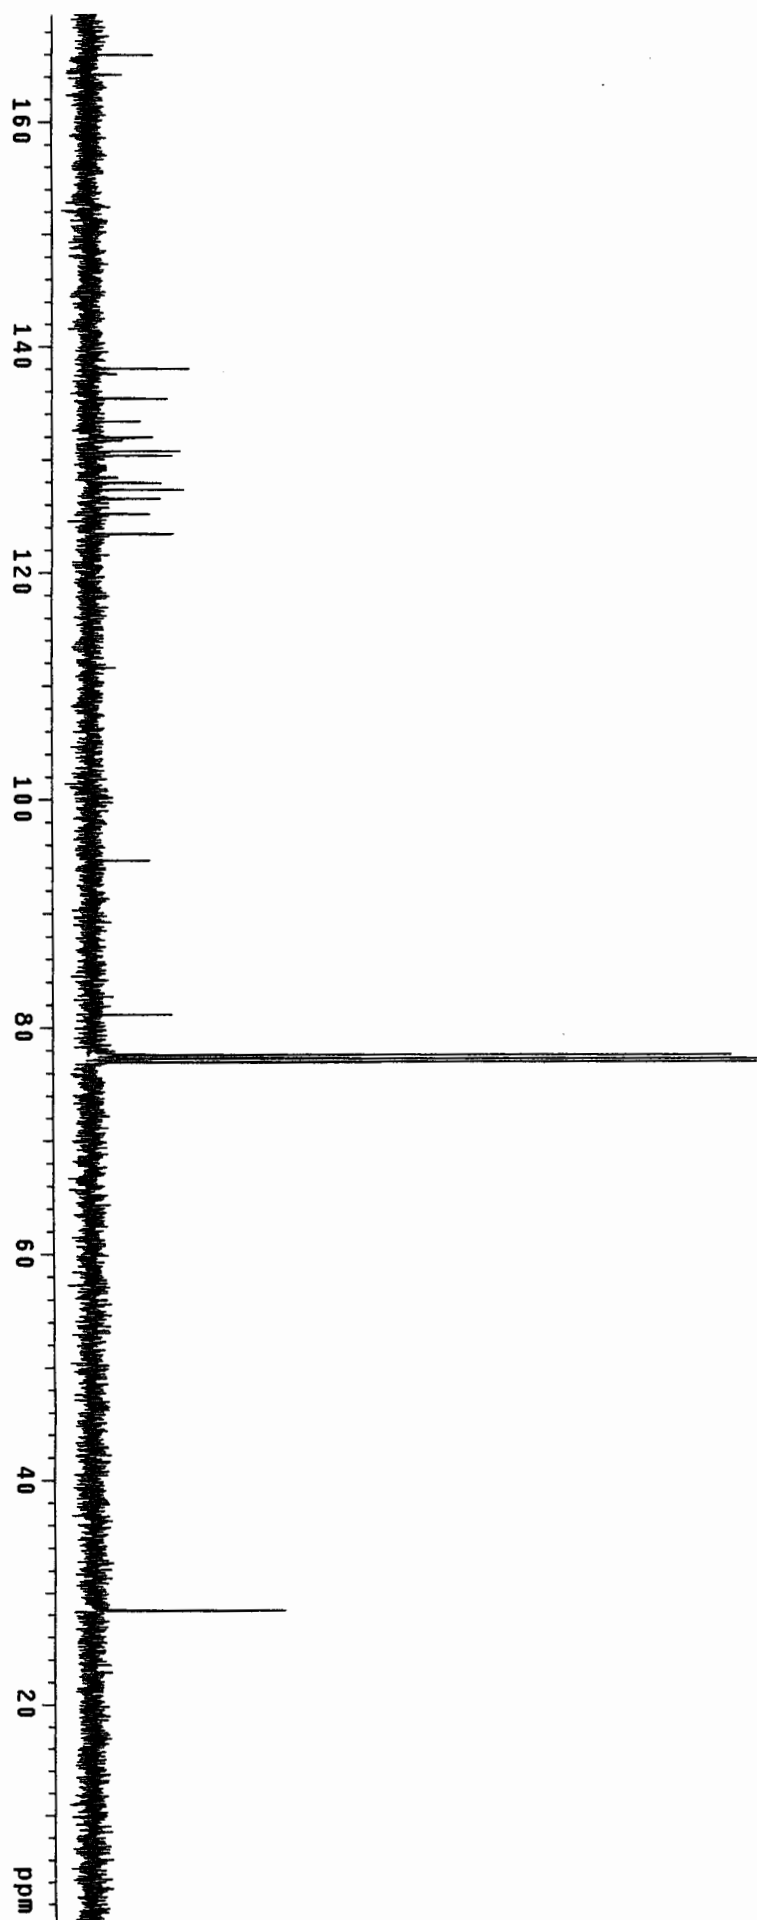



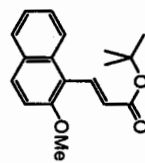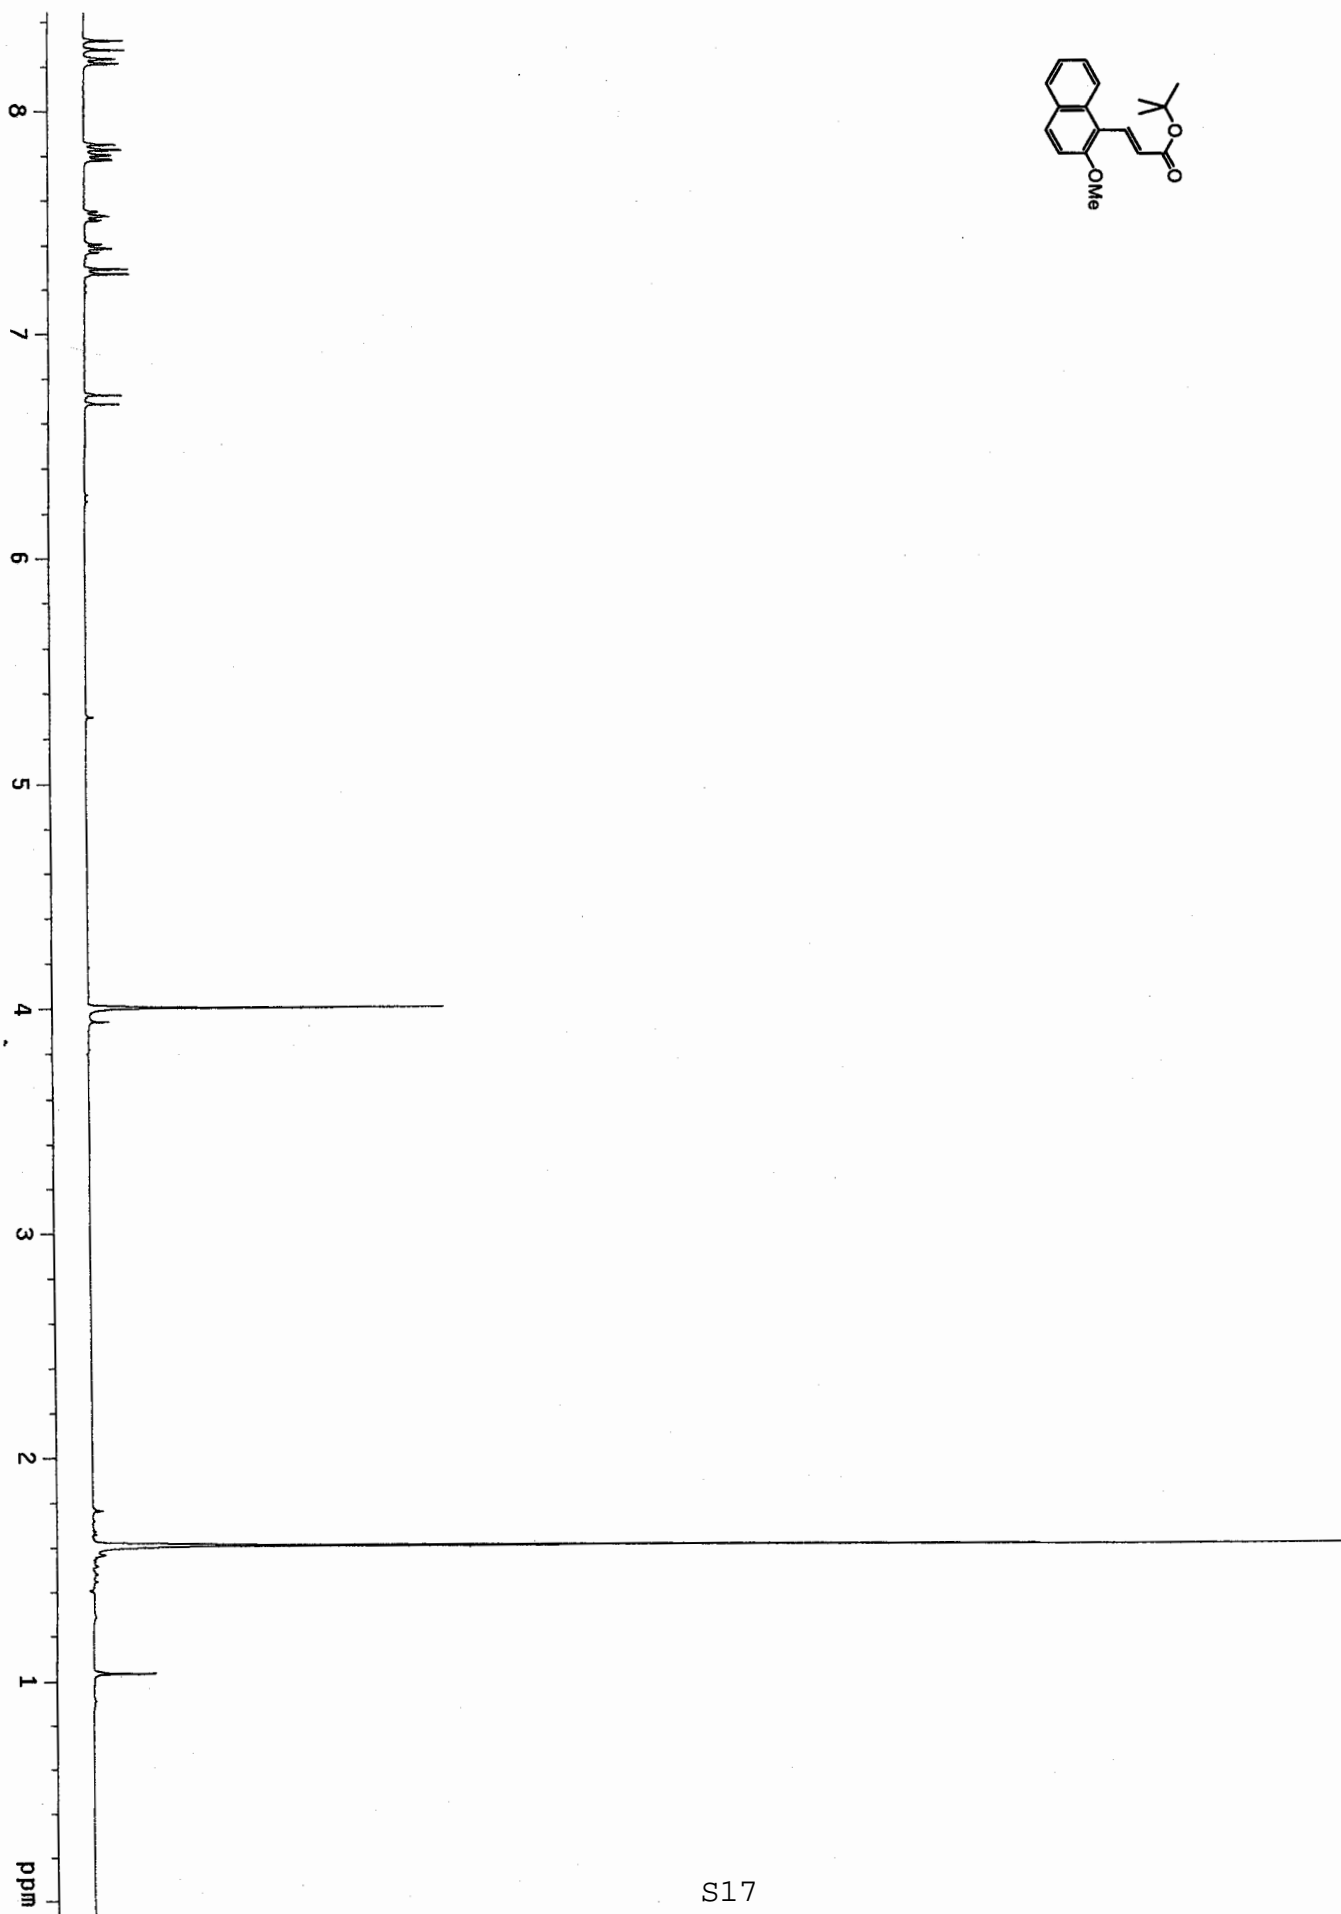

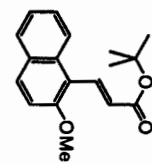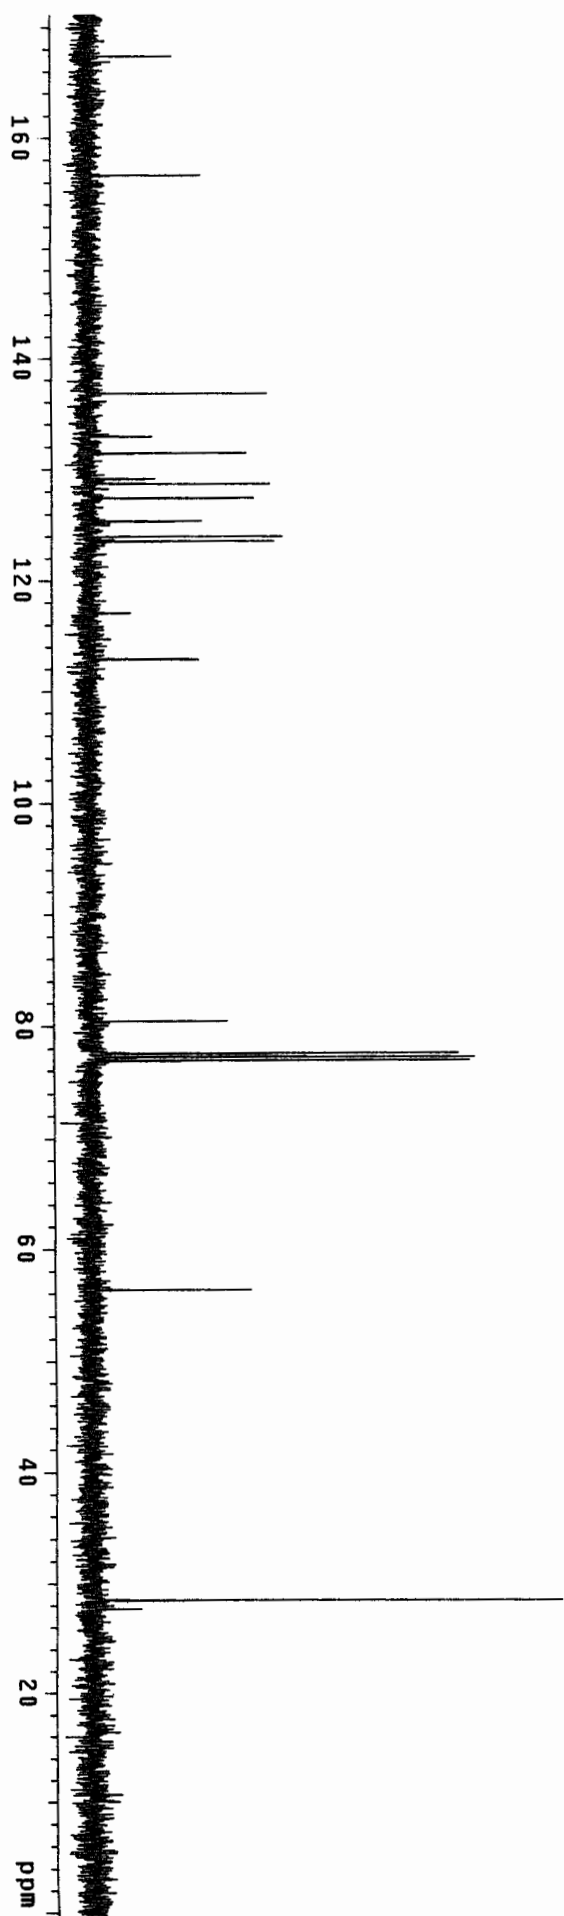

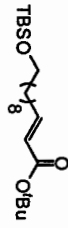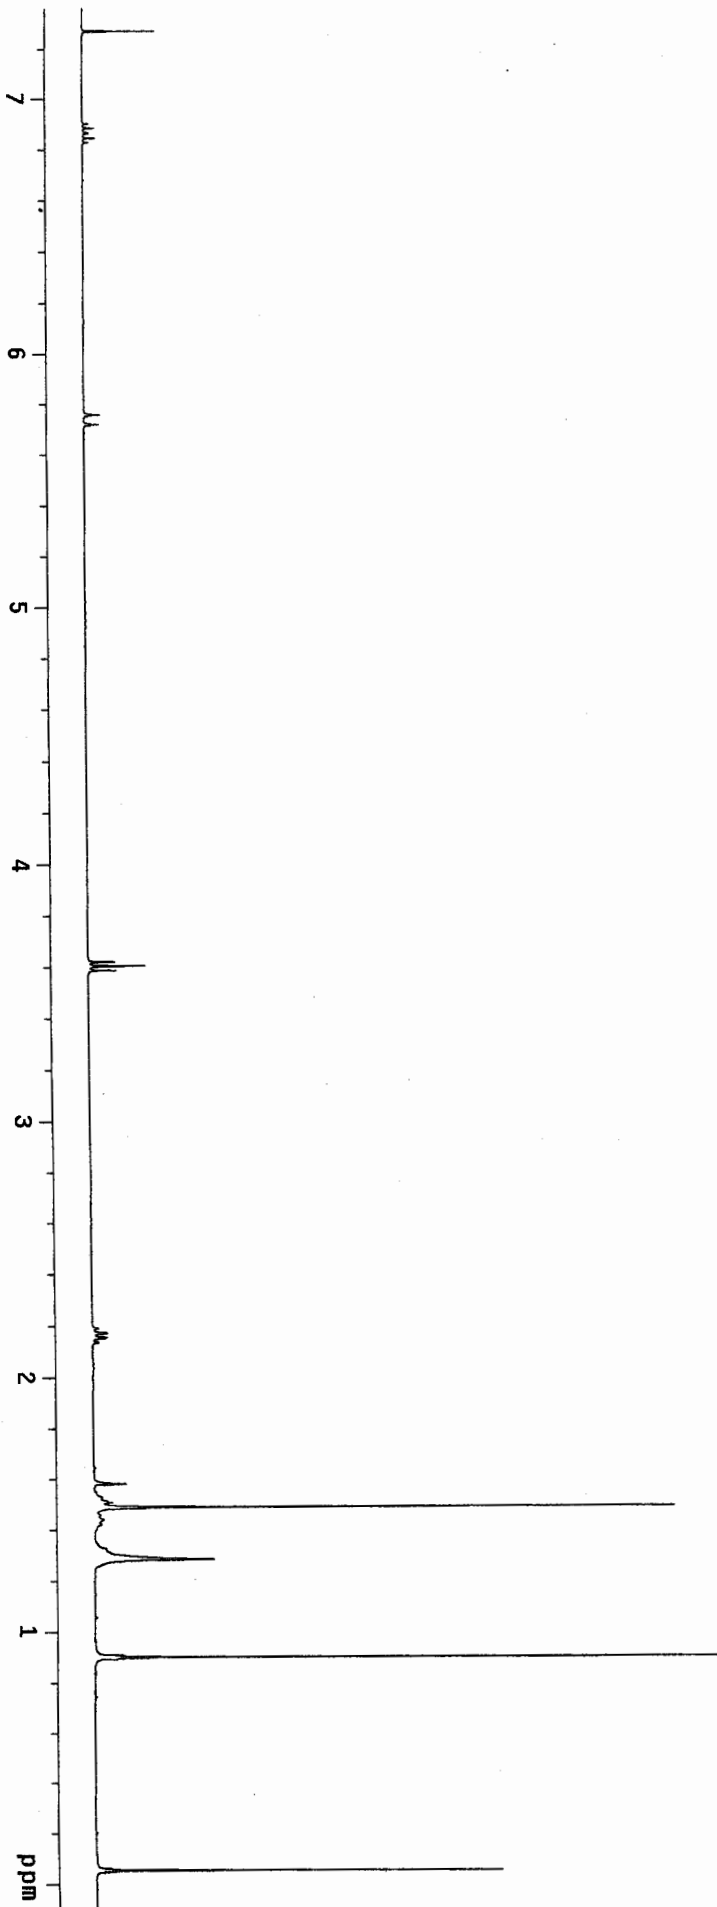

Table 5, entry 2

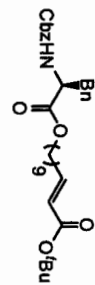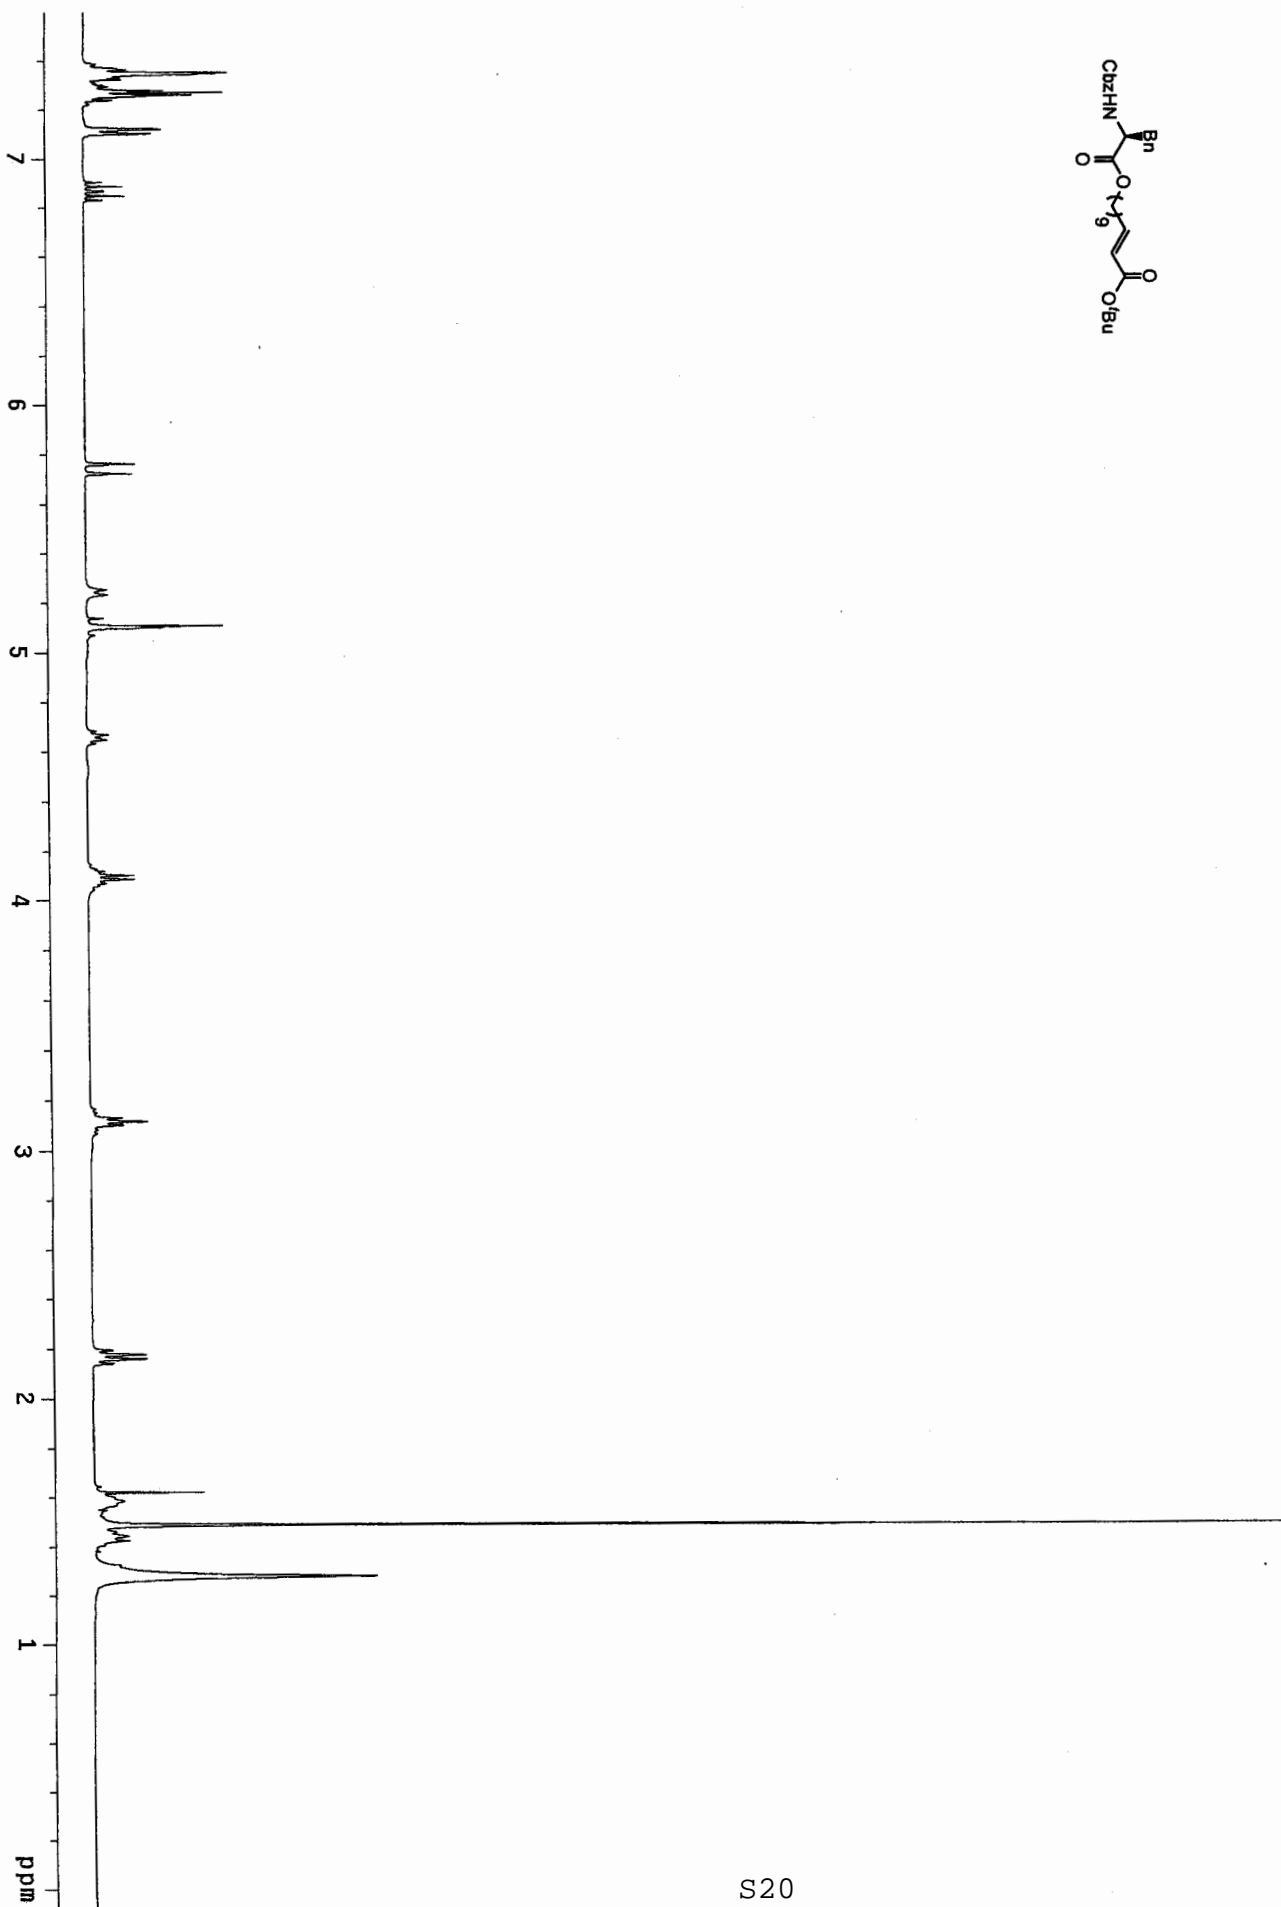

Table 5, entry 3

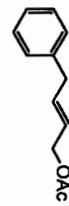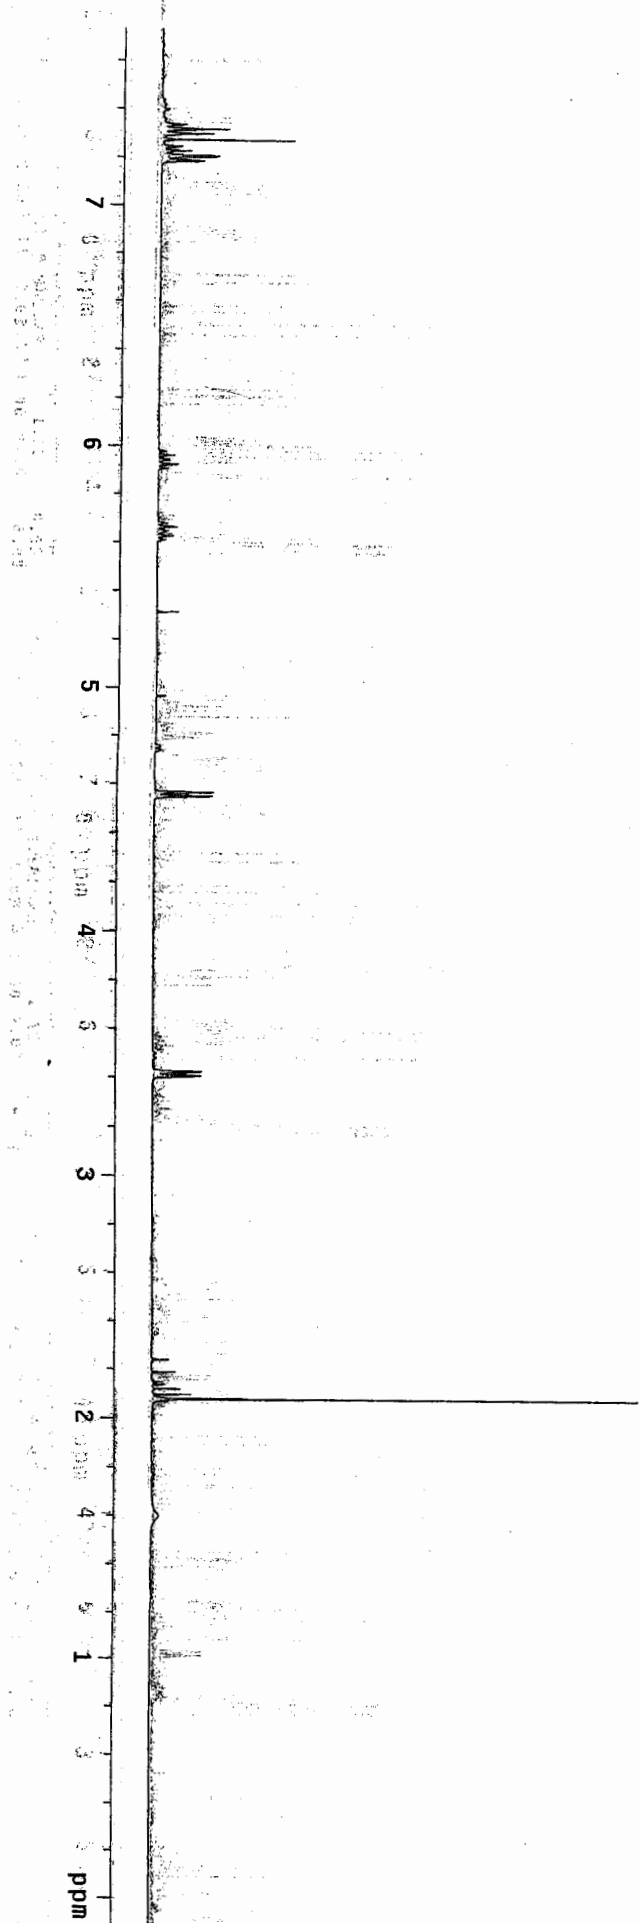

Table 5, entry 4

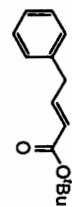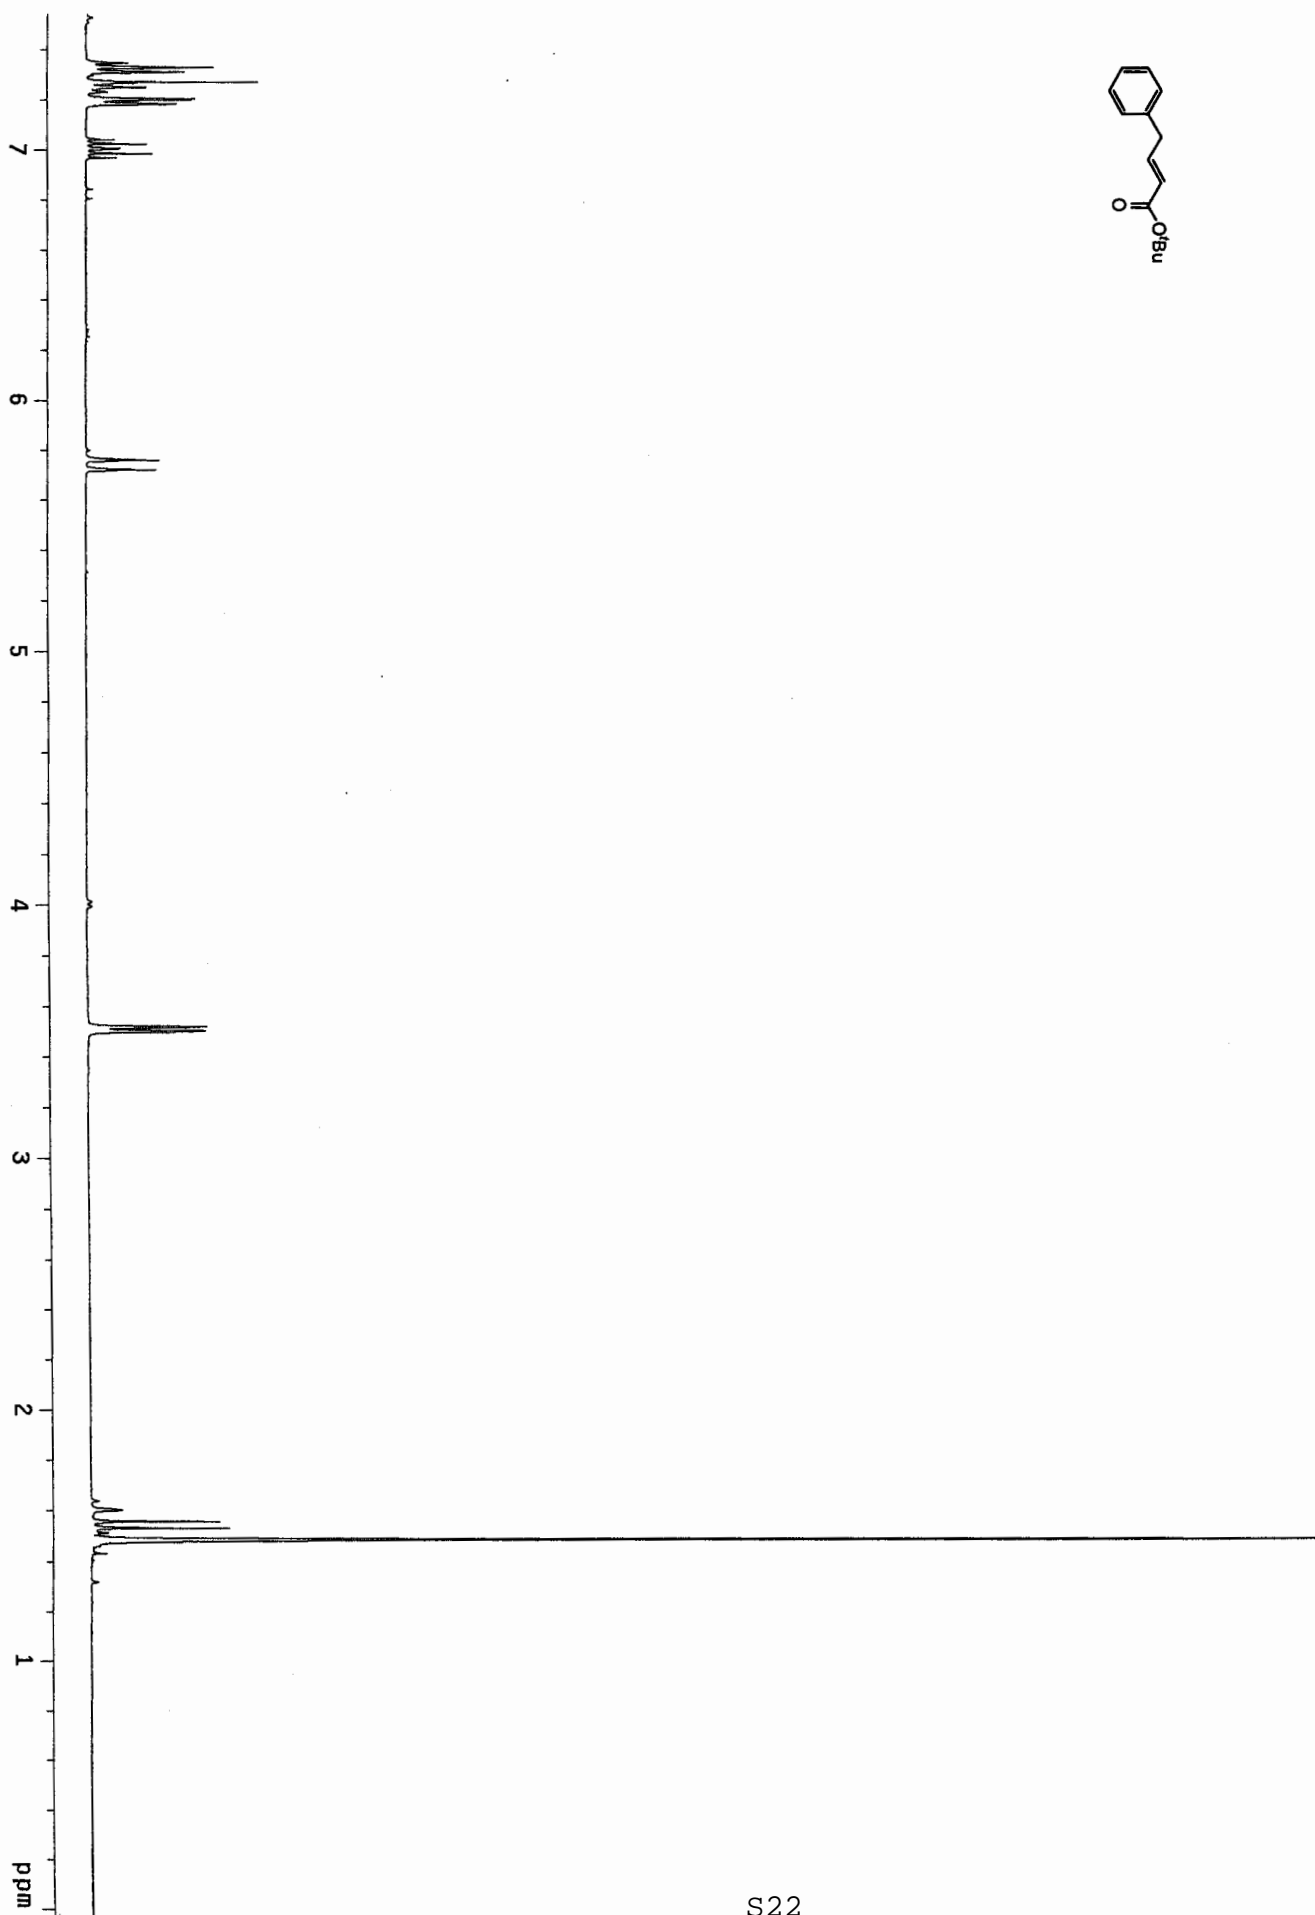

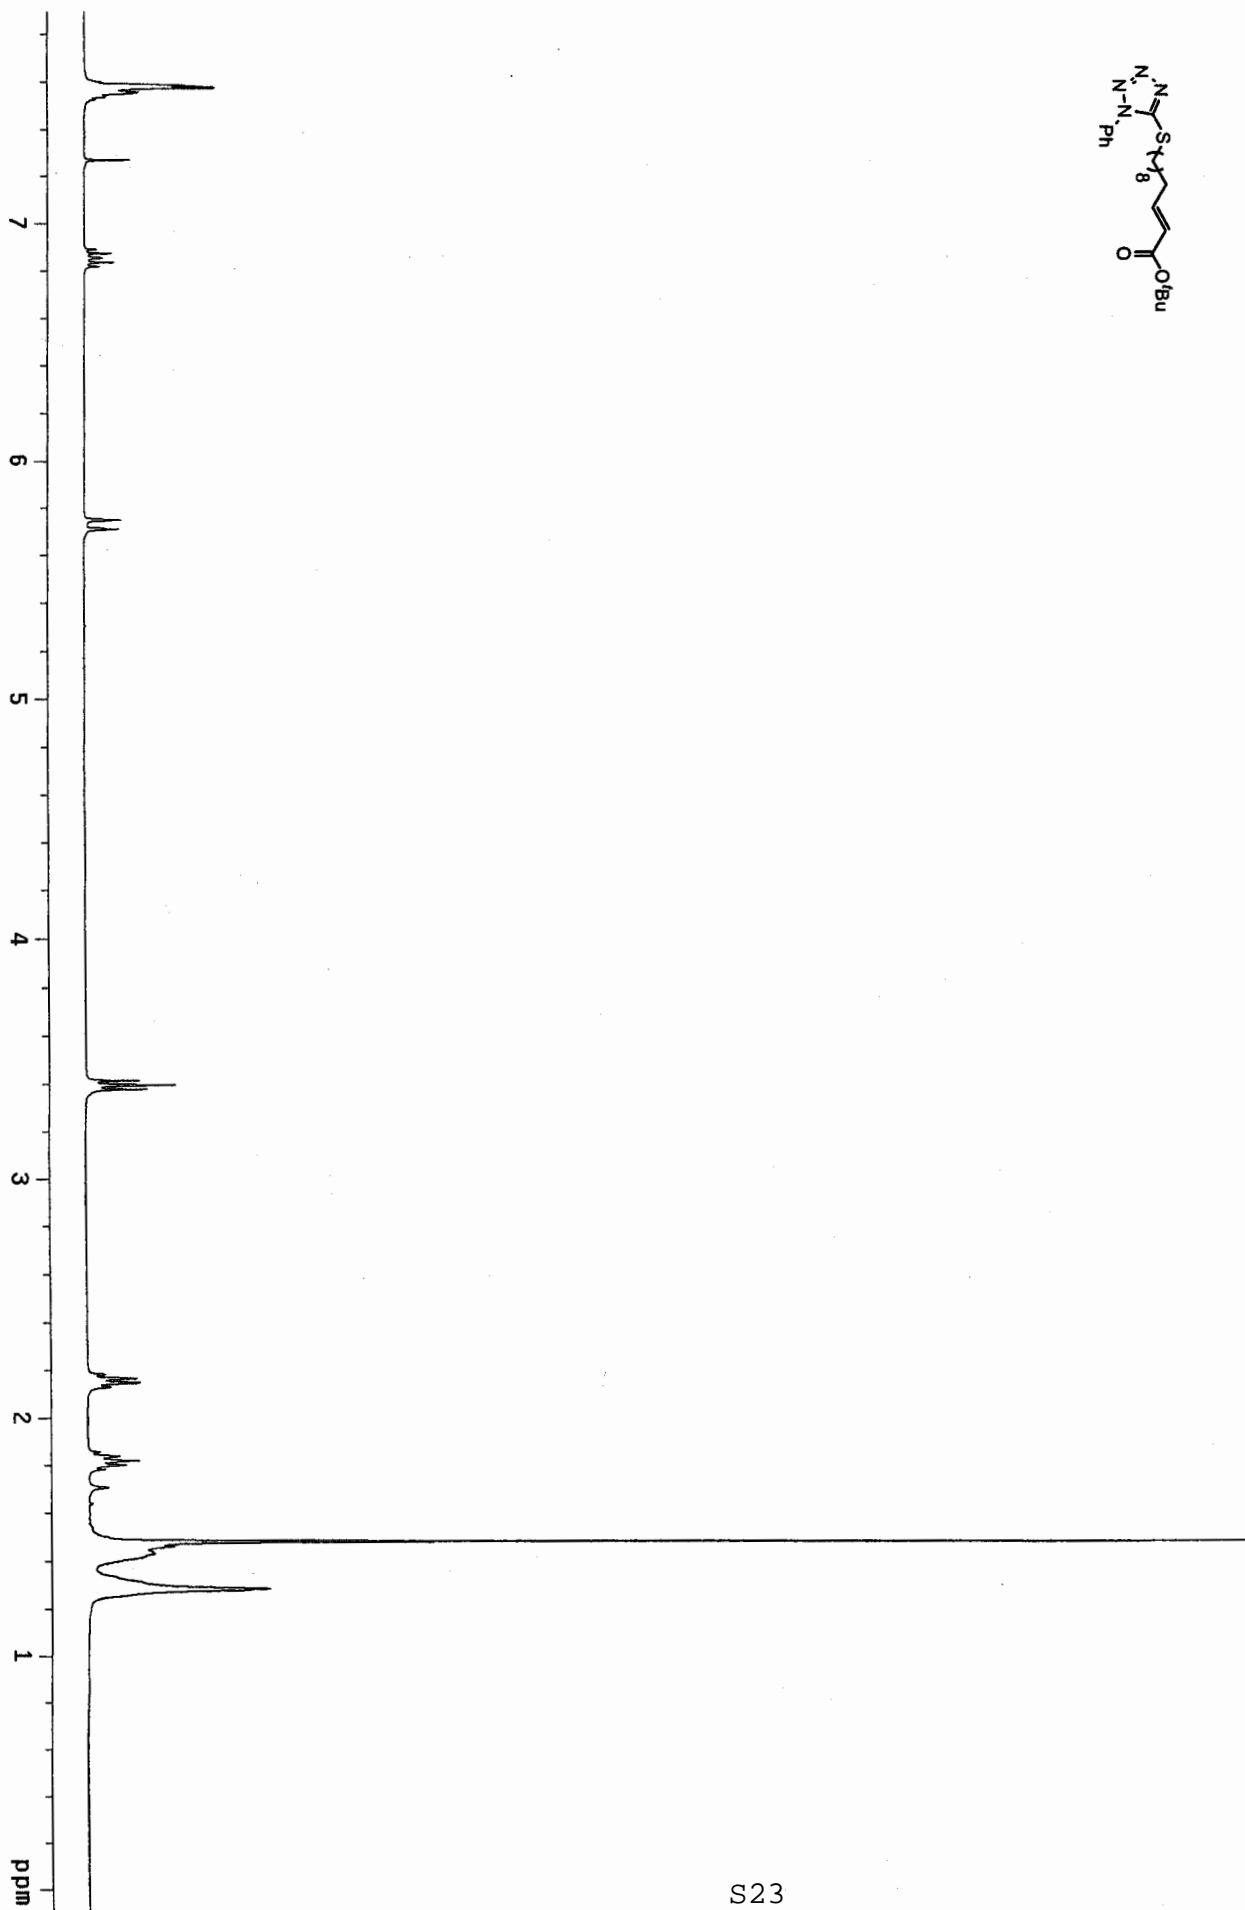

Table 5, entry 5

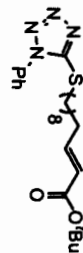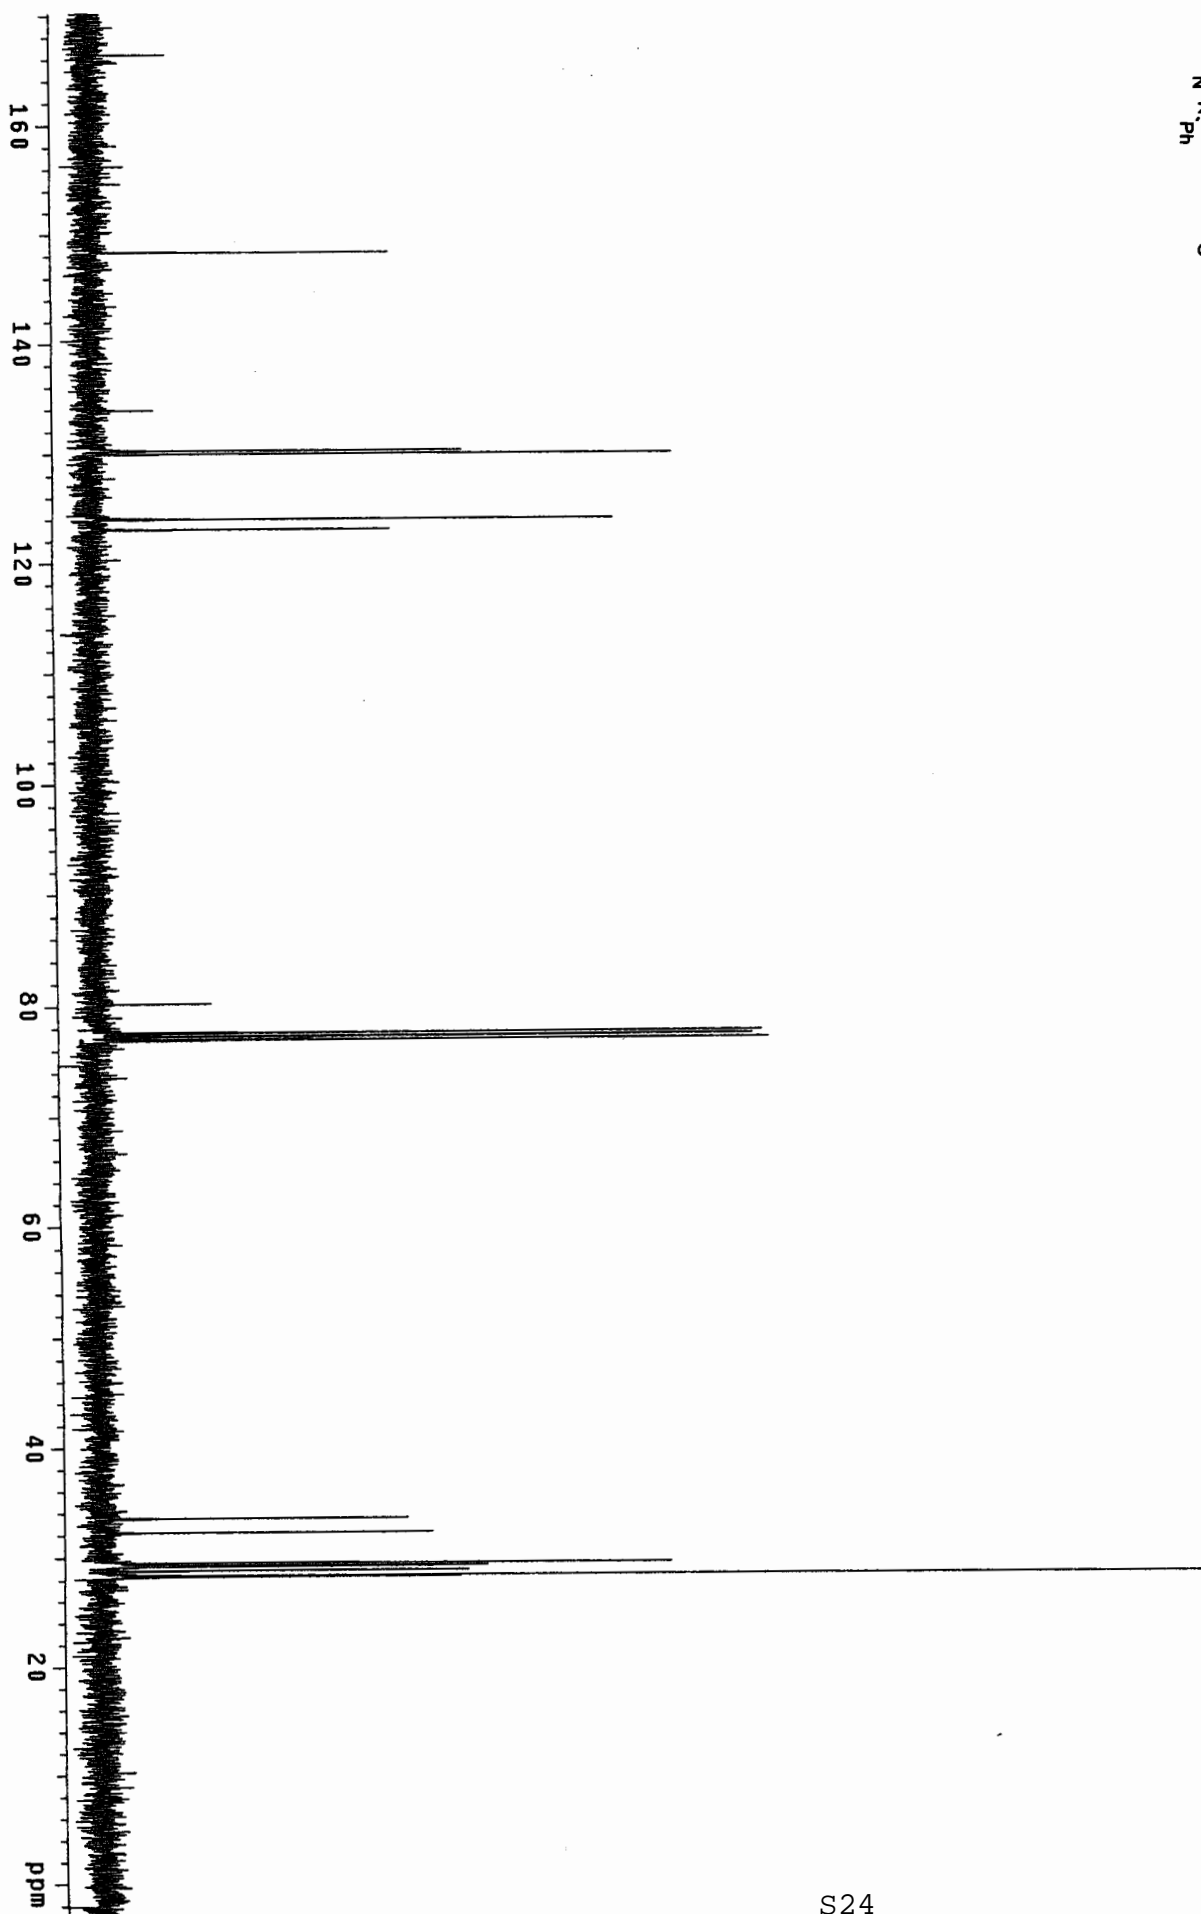



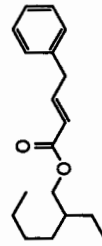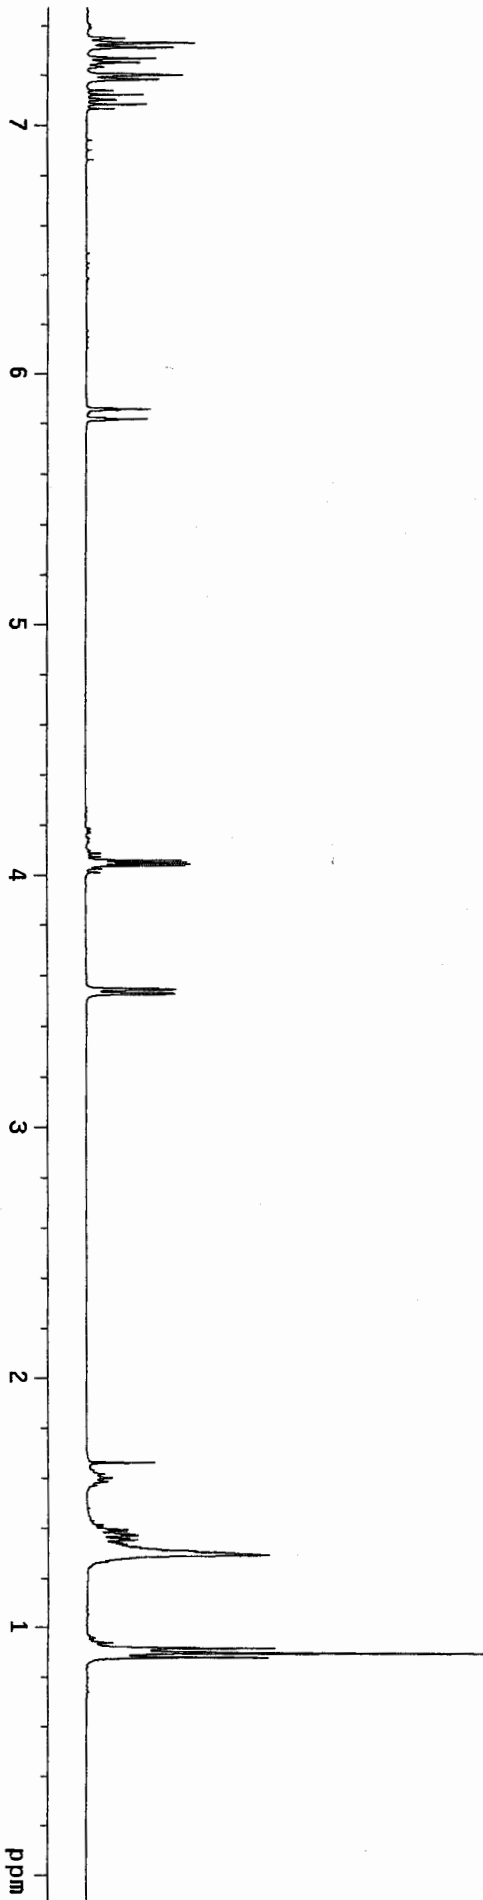

Table 5, entry 7

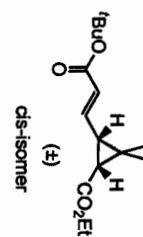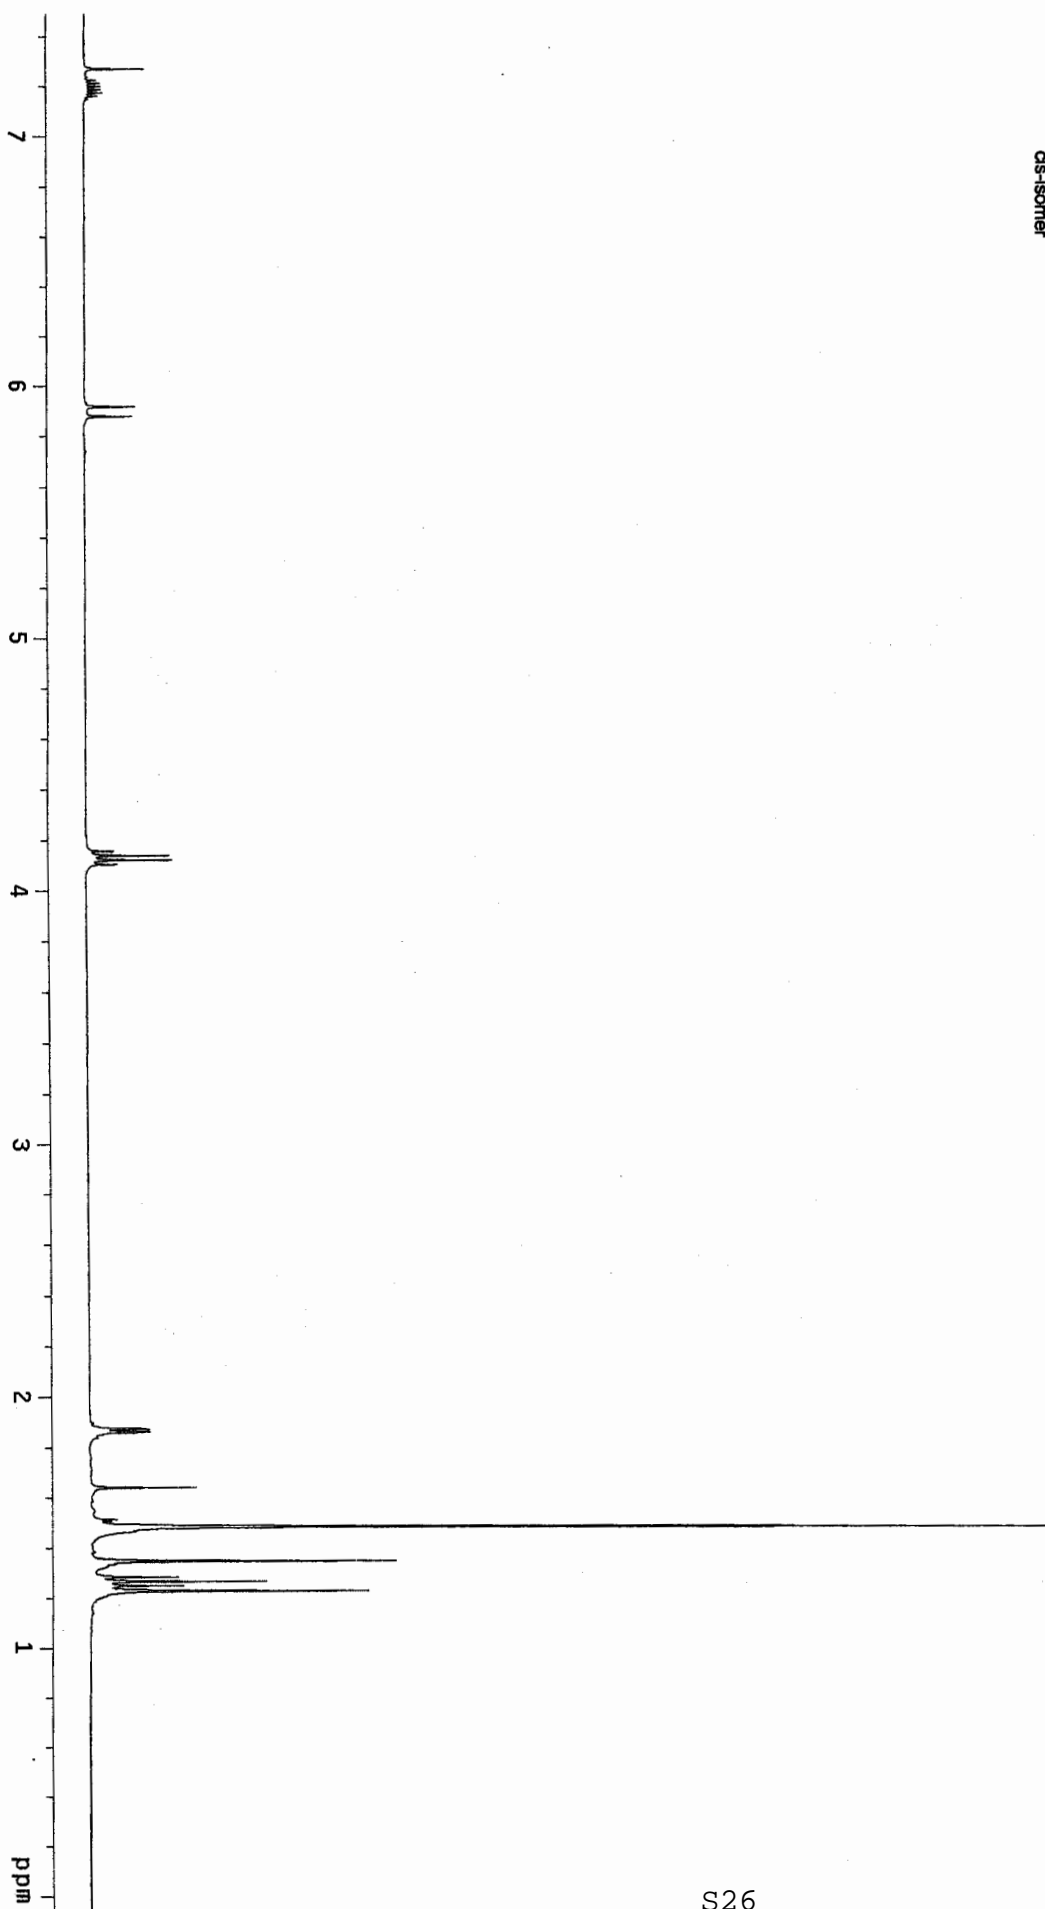

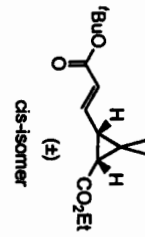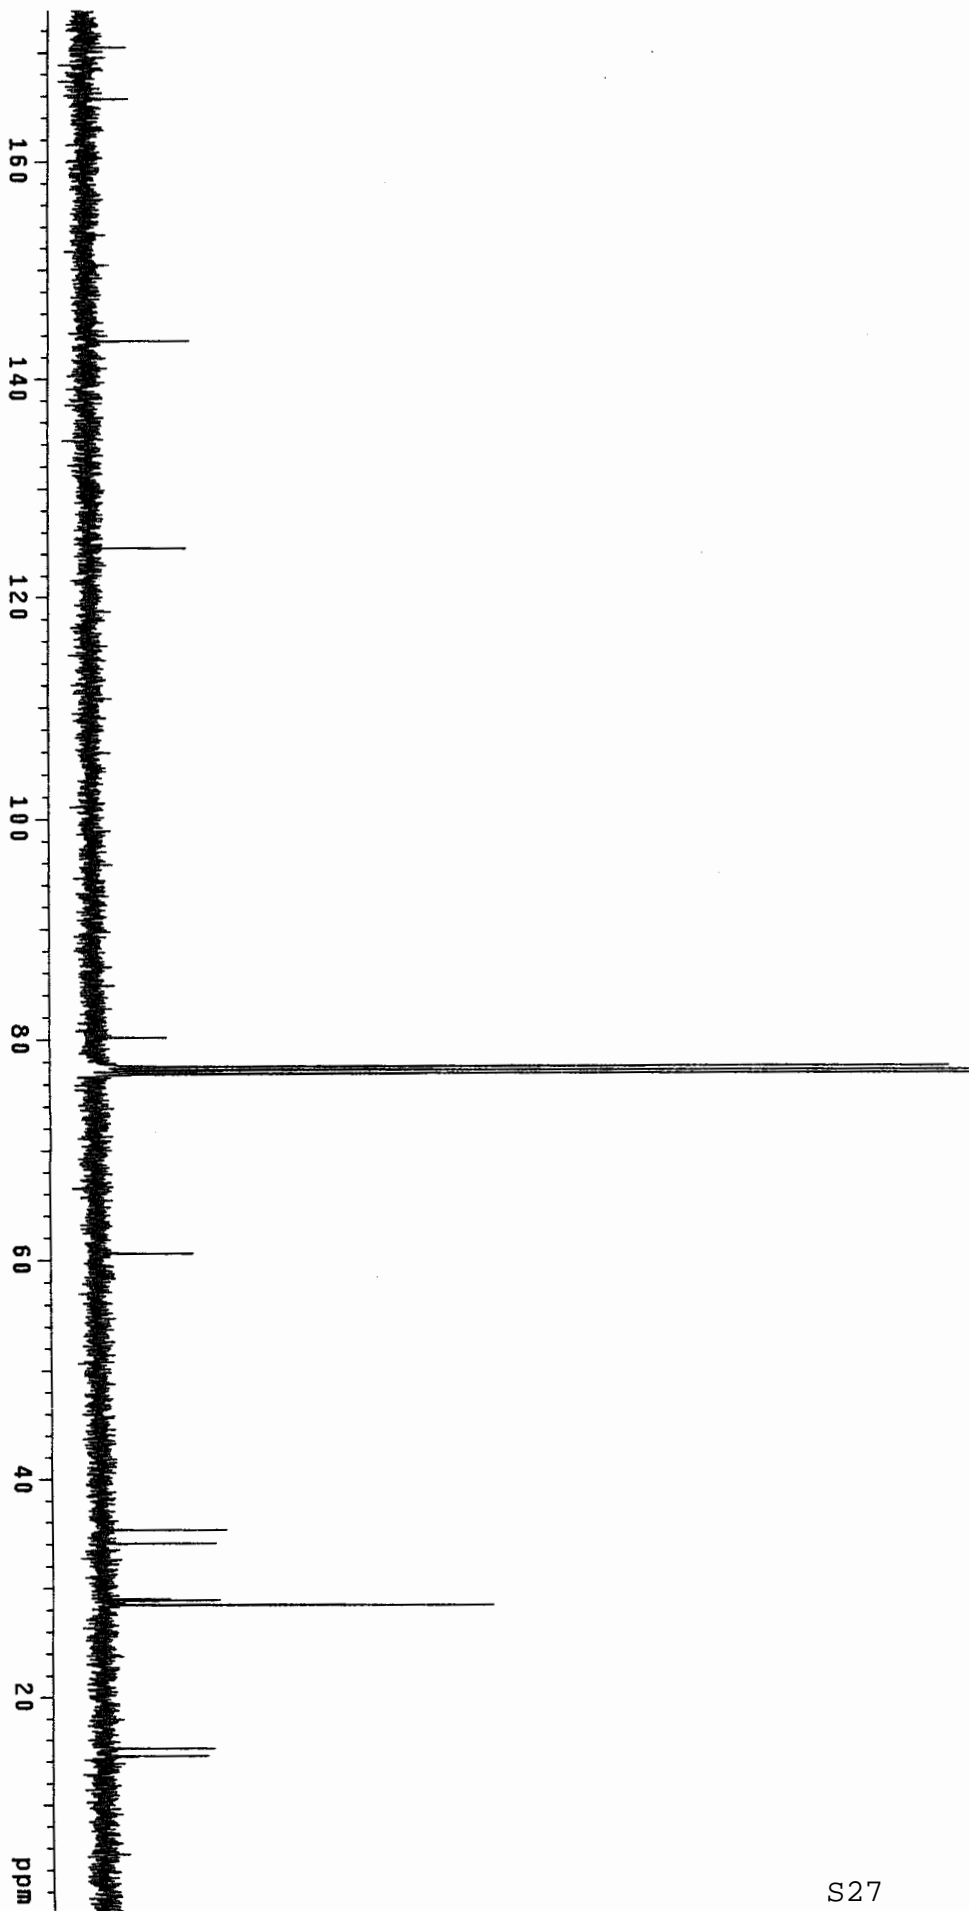

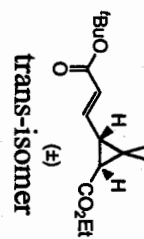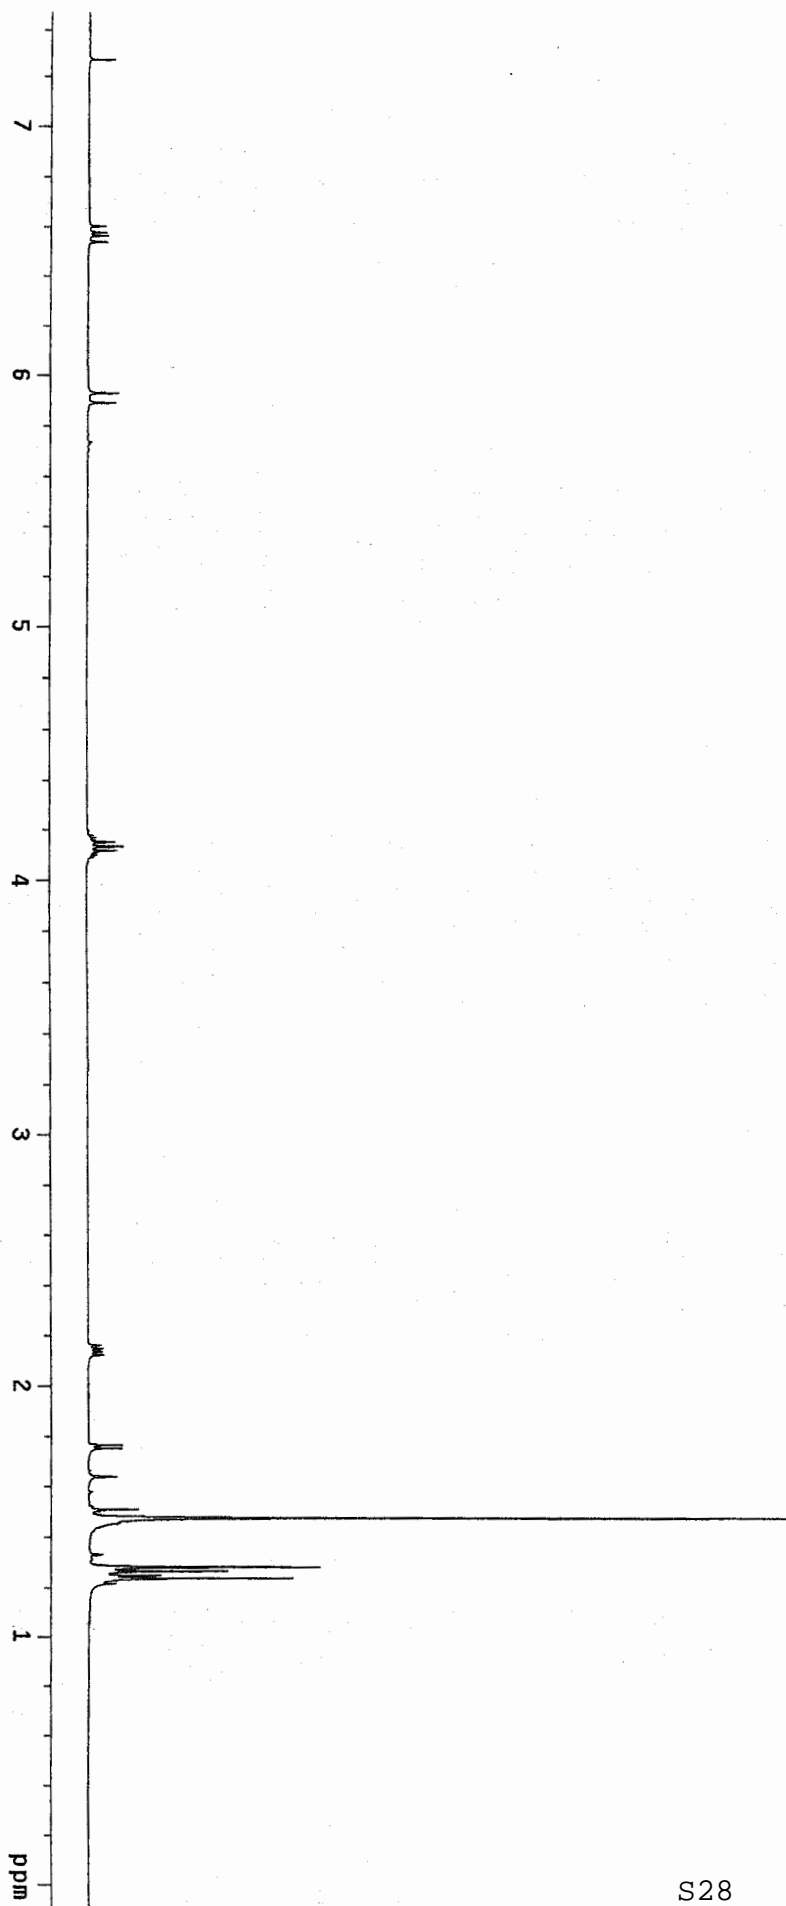

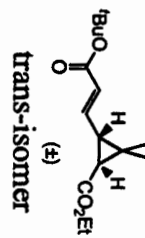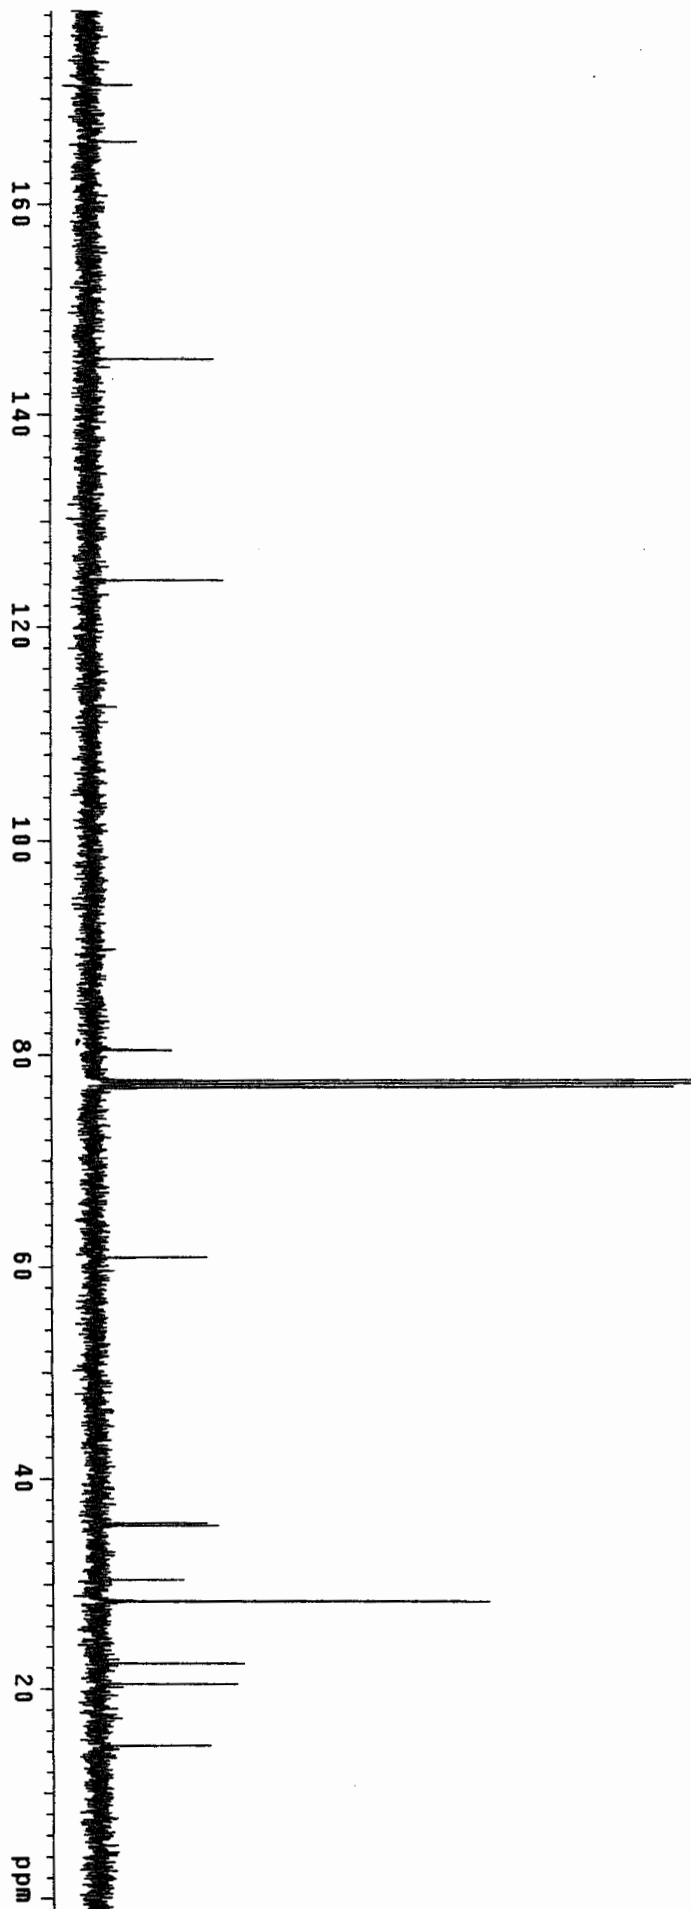

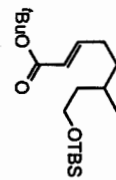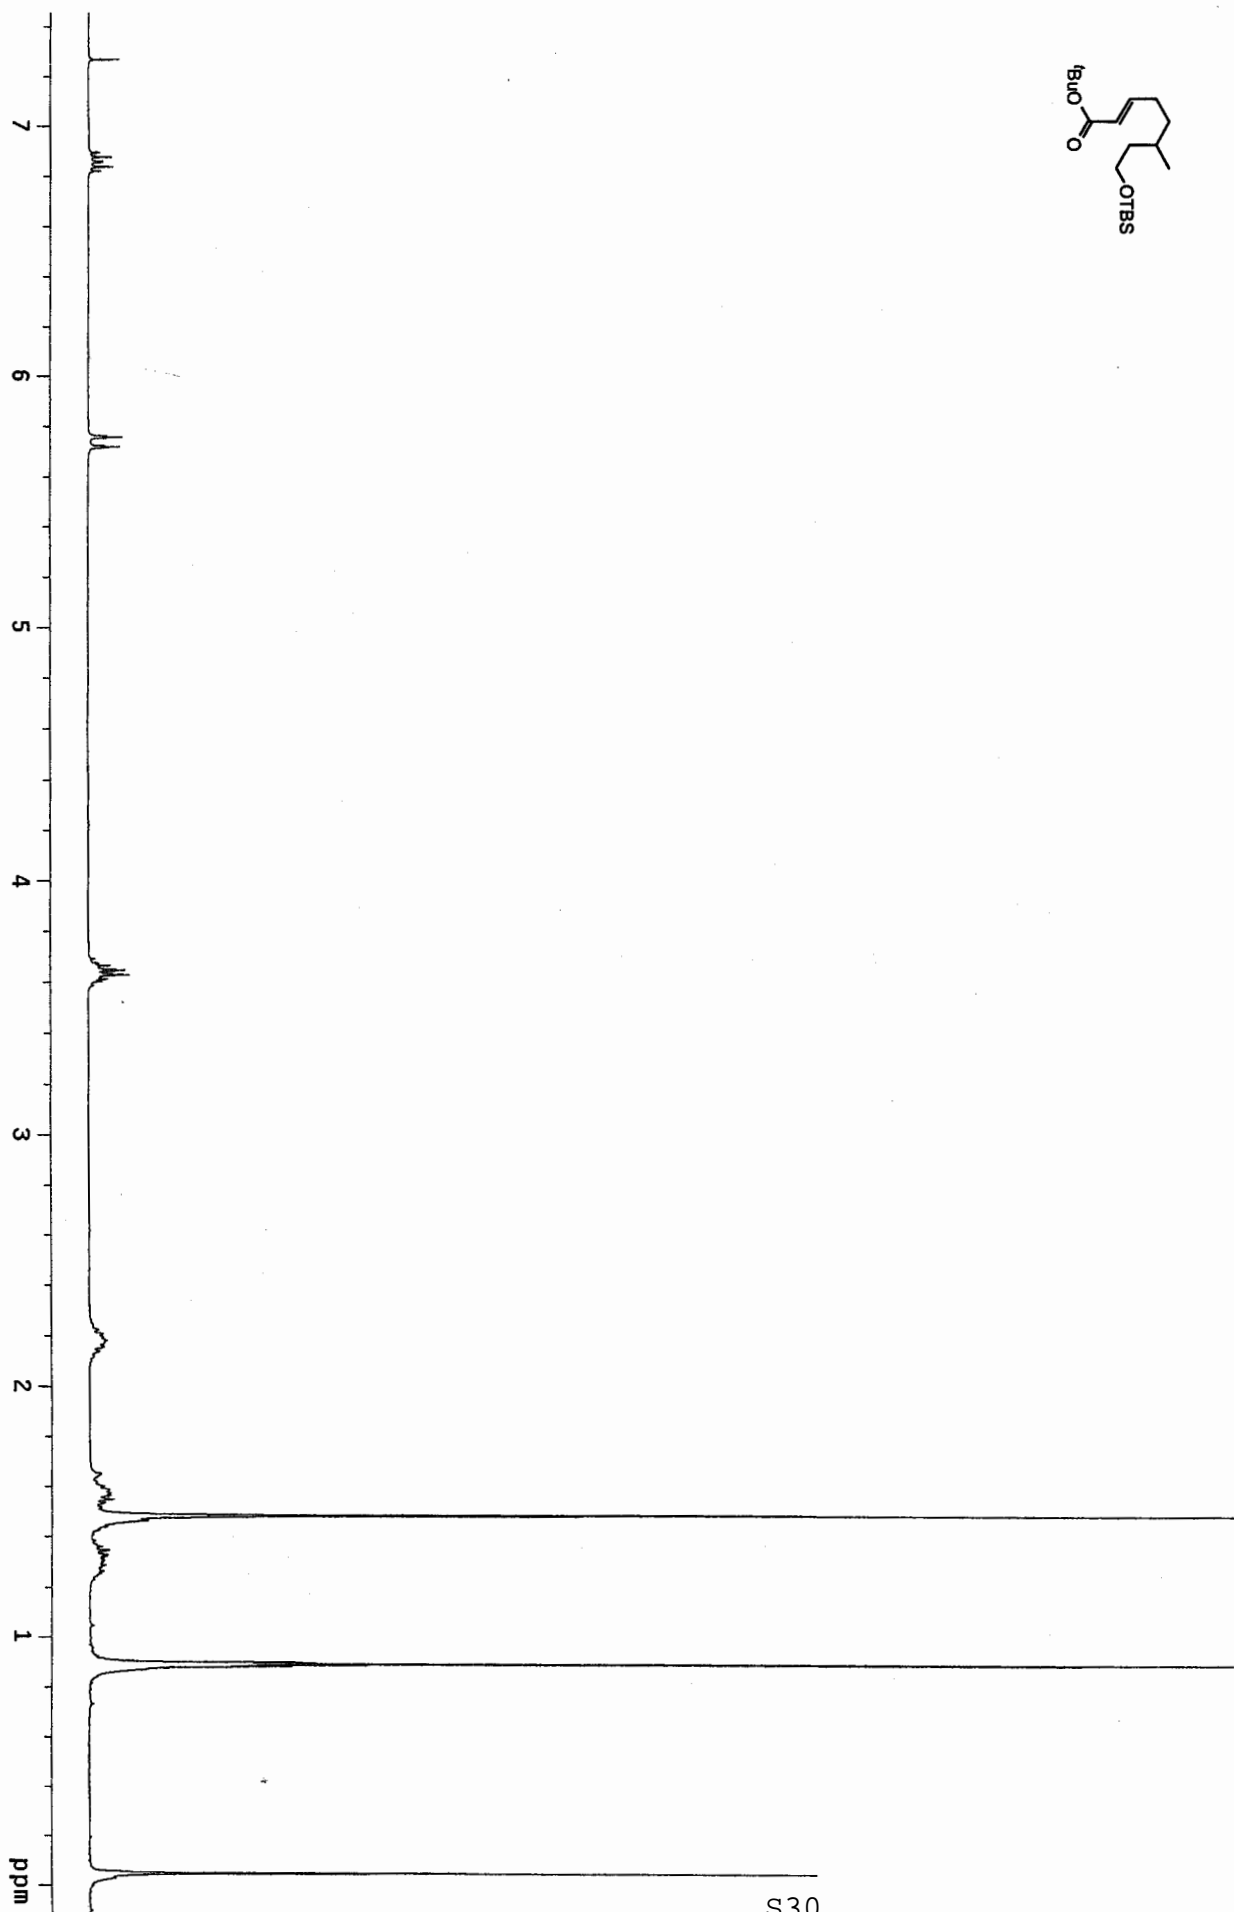

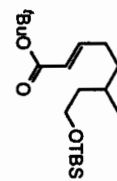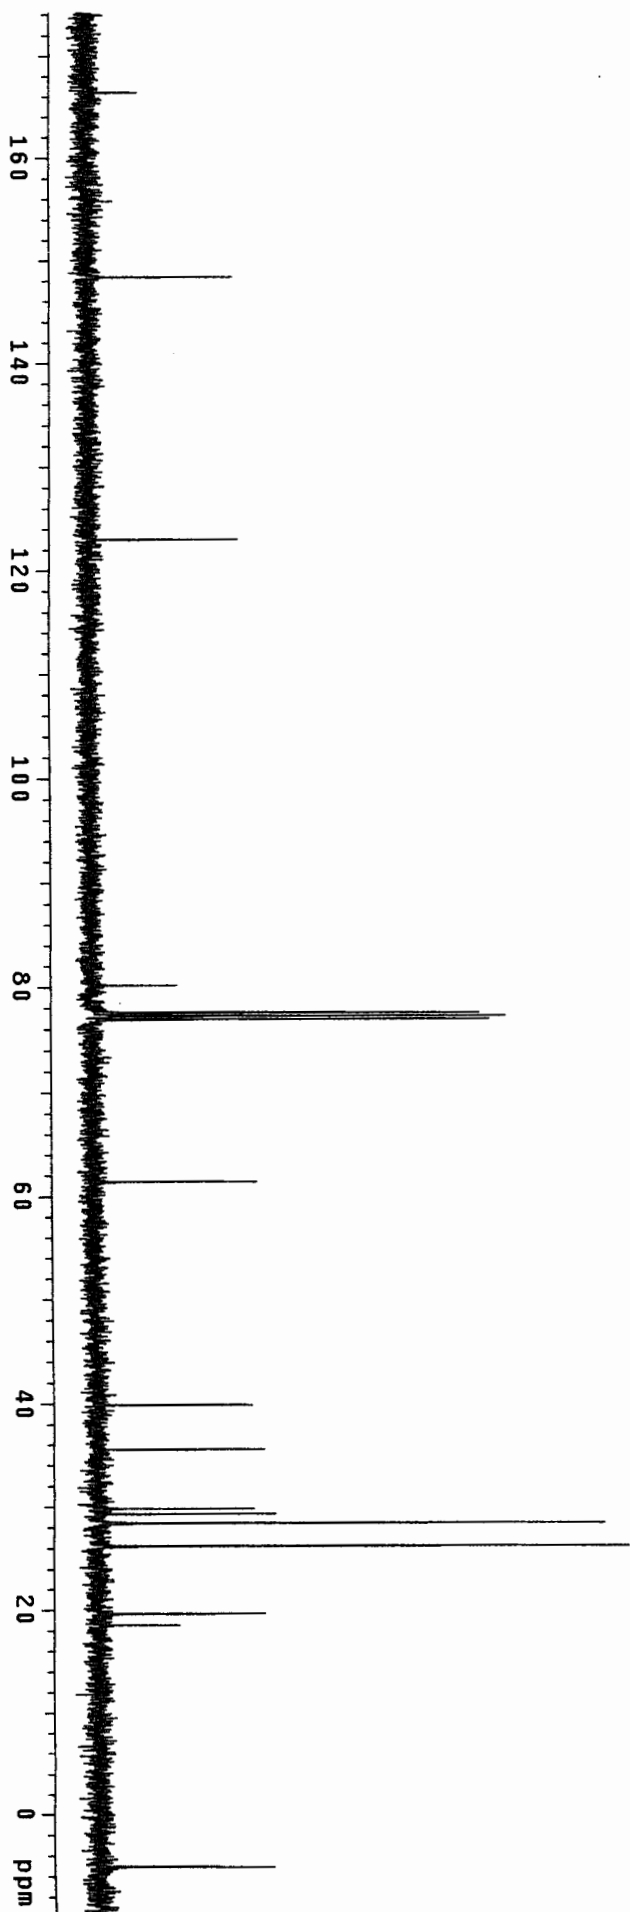

Table 5, entry 8

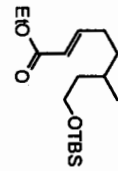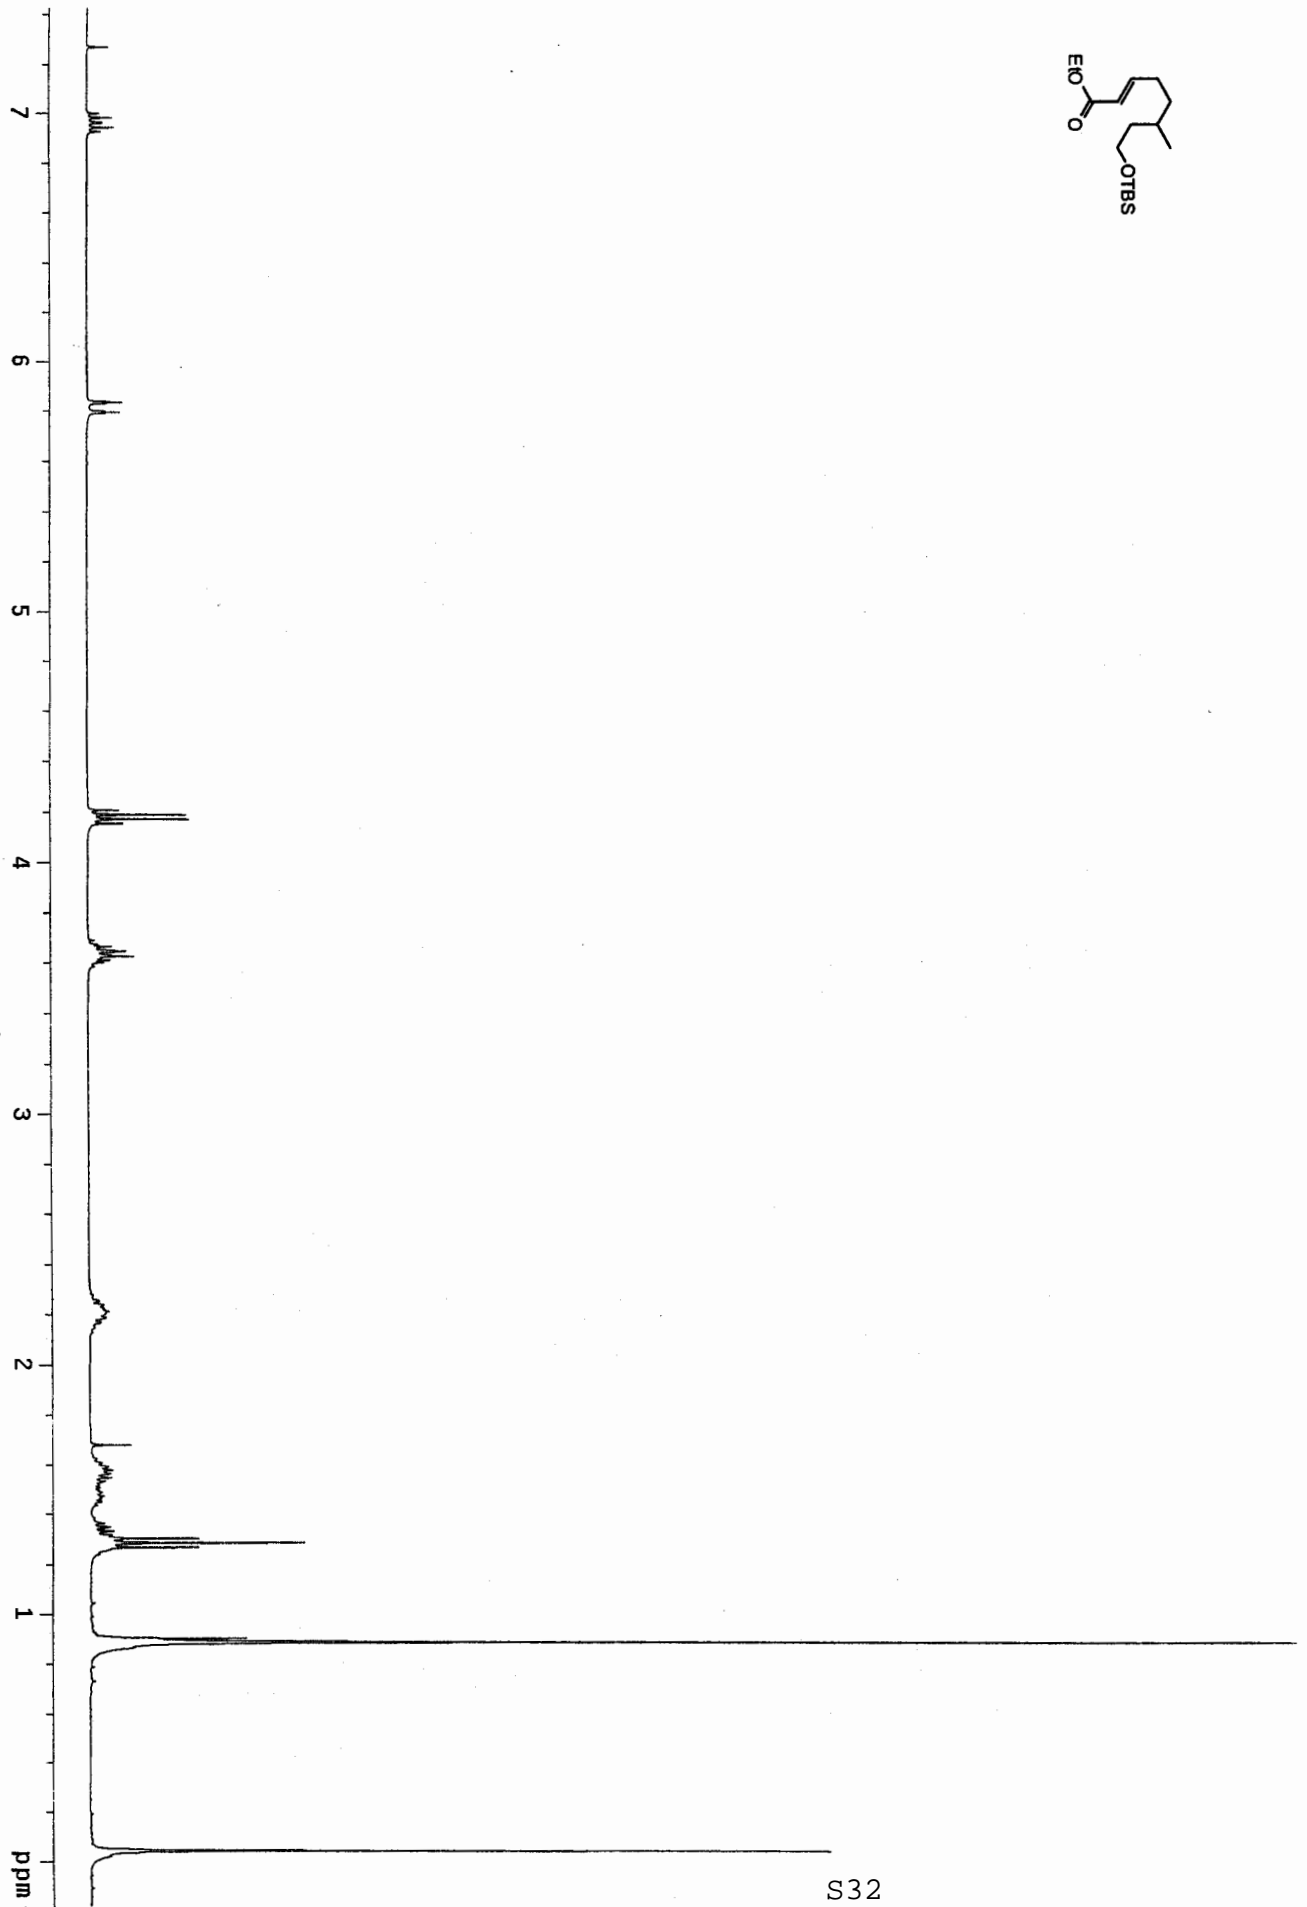



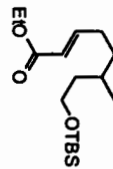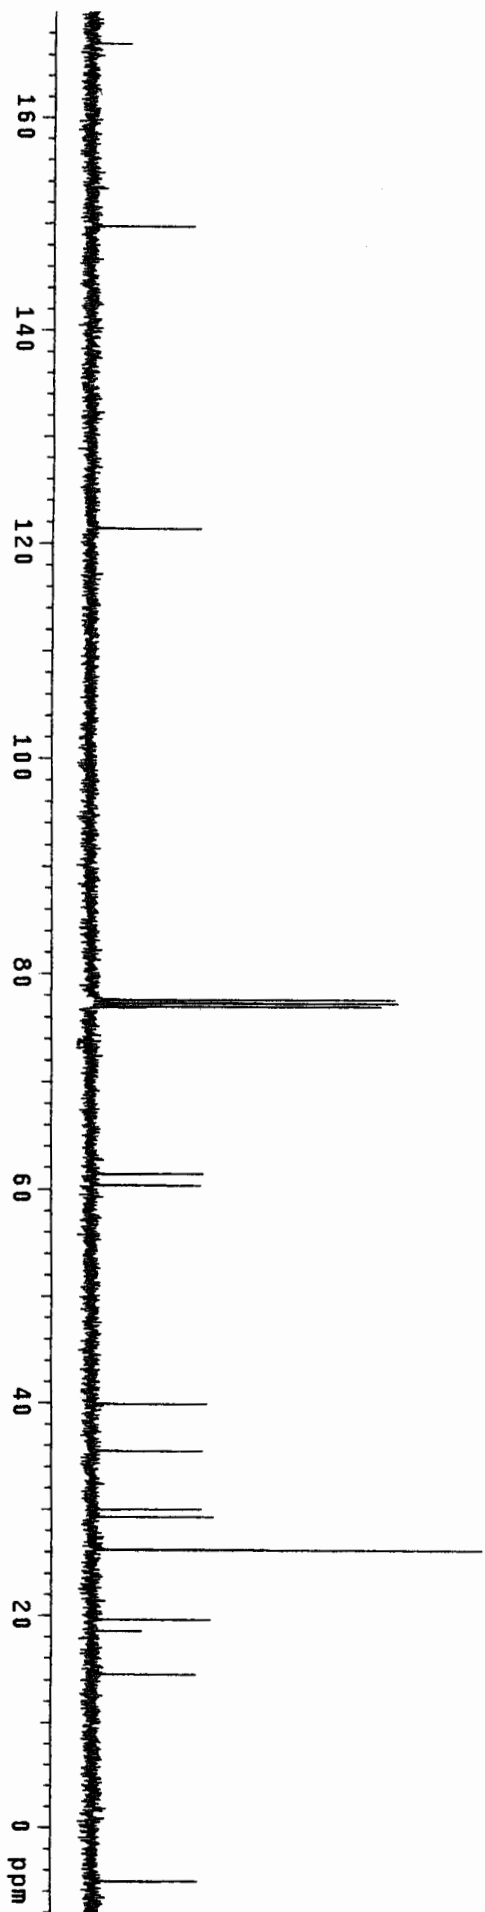

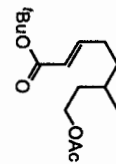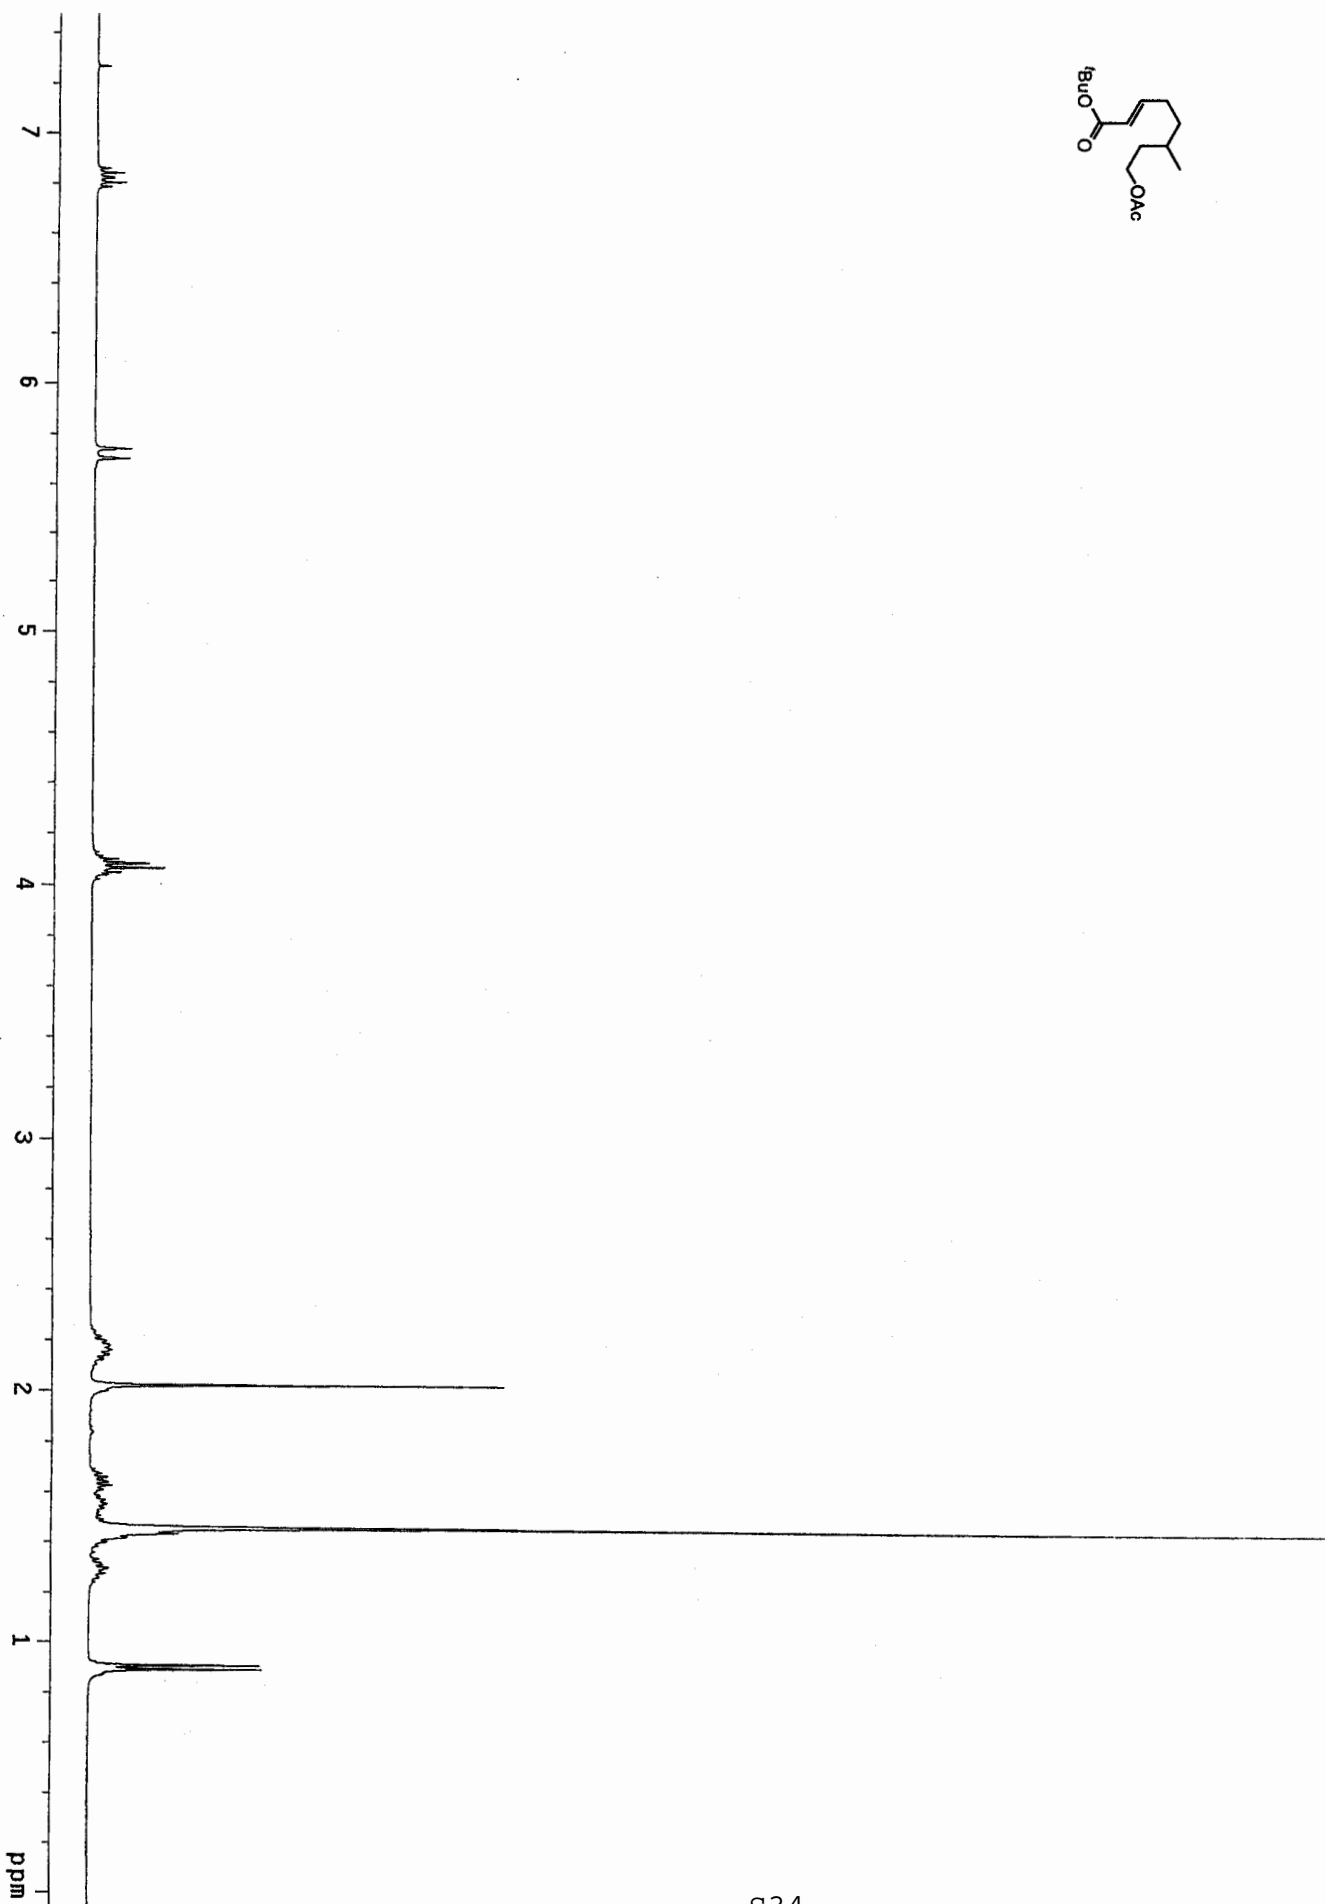

Table 5, entry 9

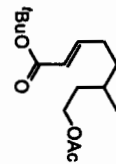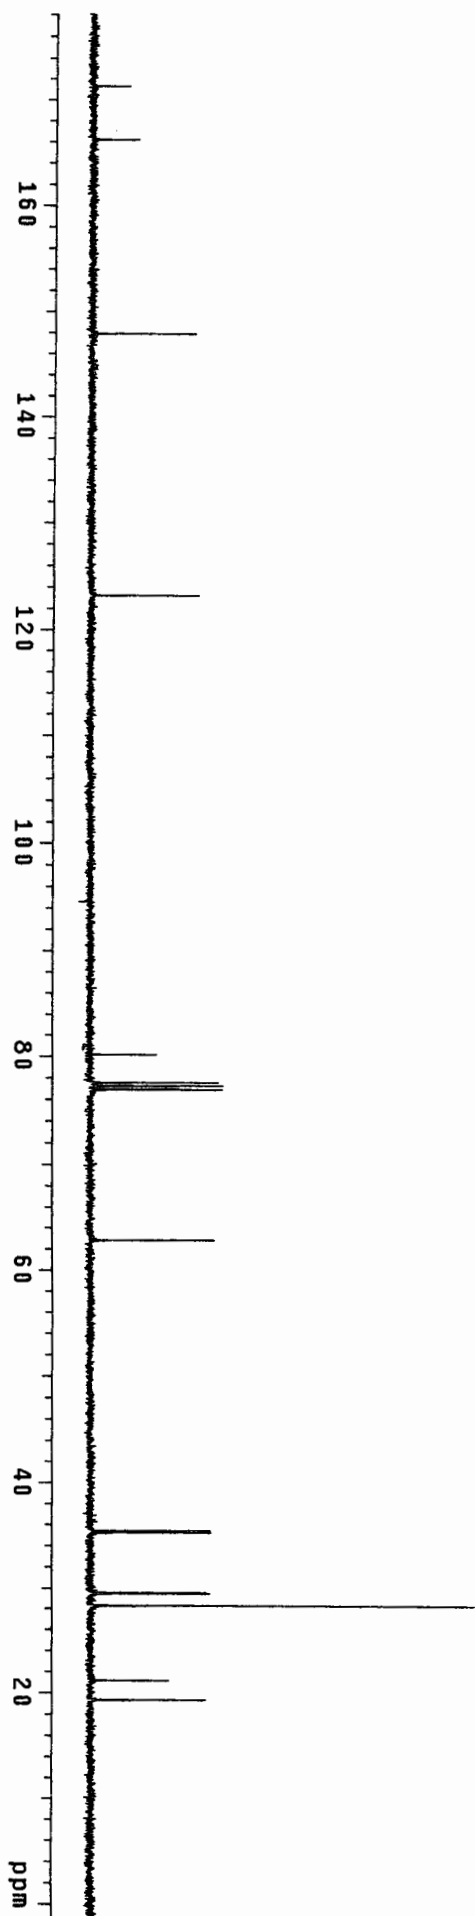

Table 5, entry 9

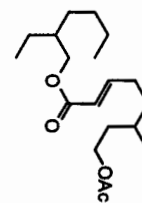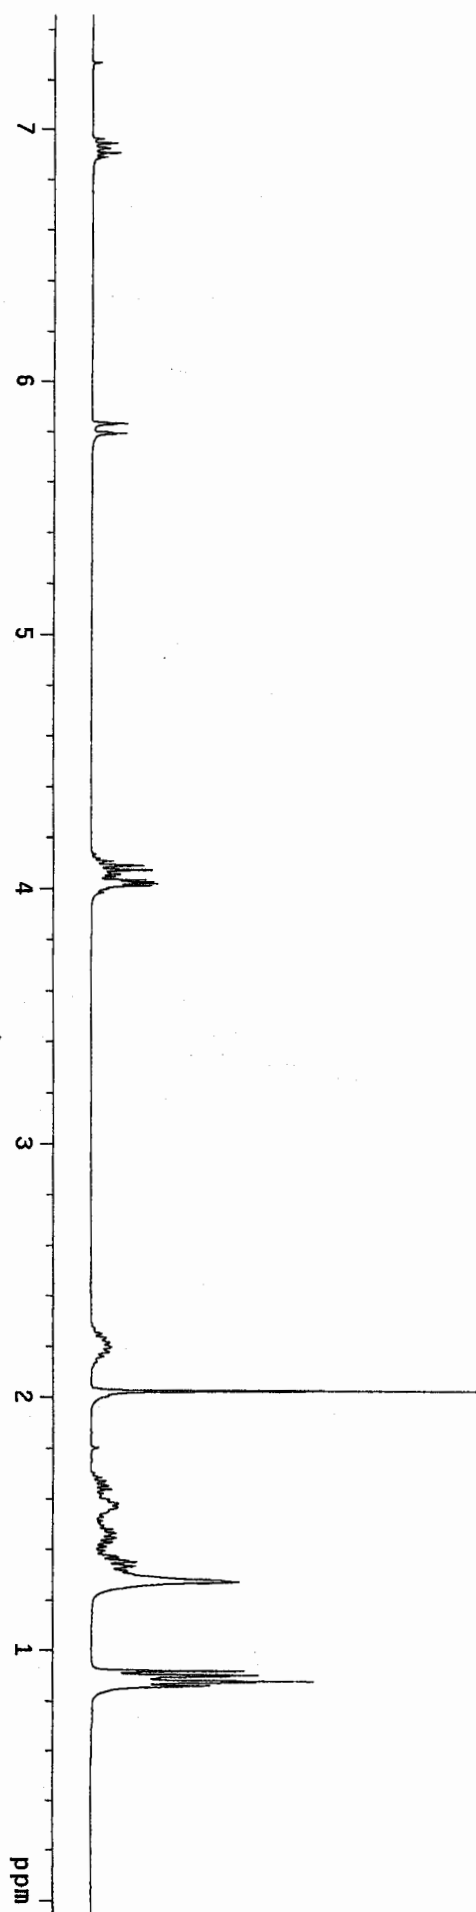

Table 5, entry 9

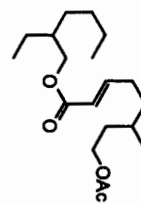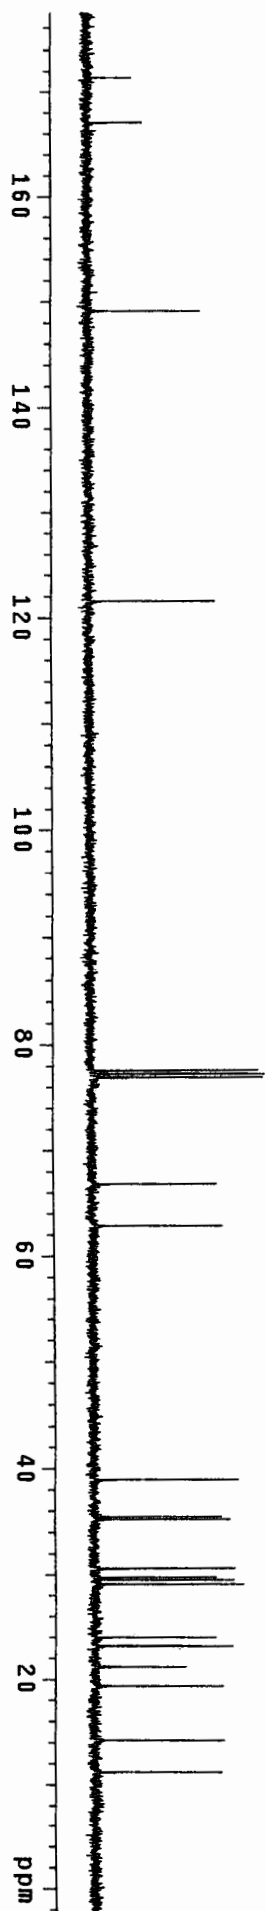

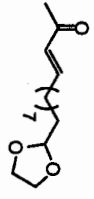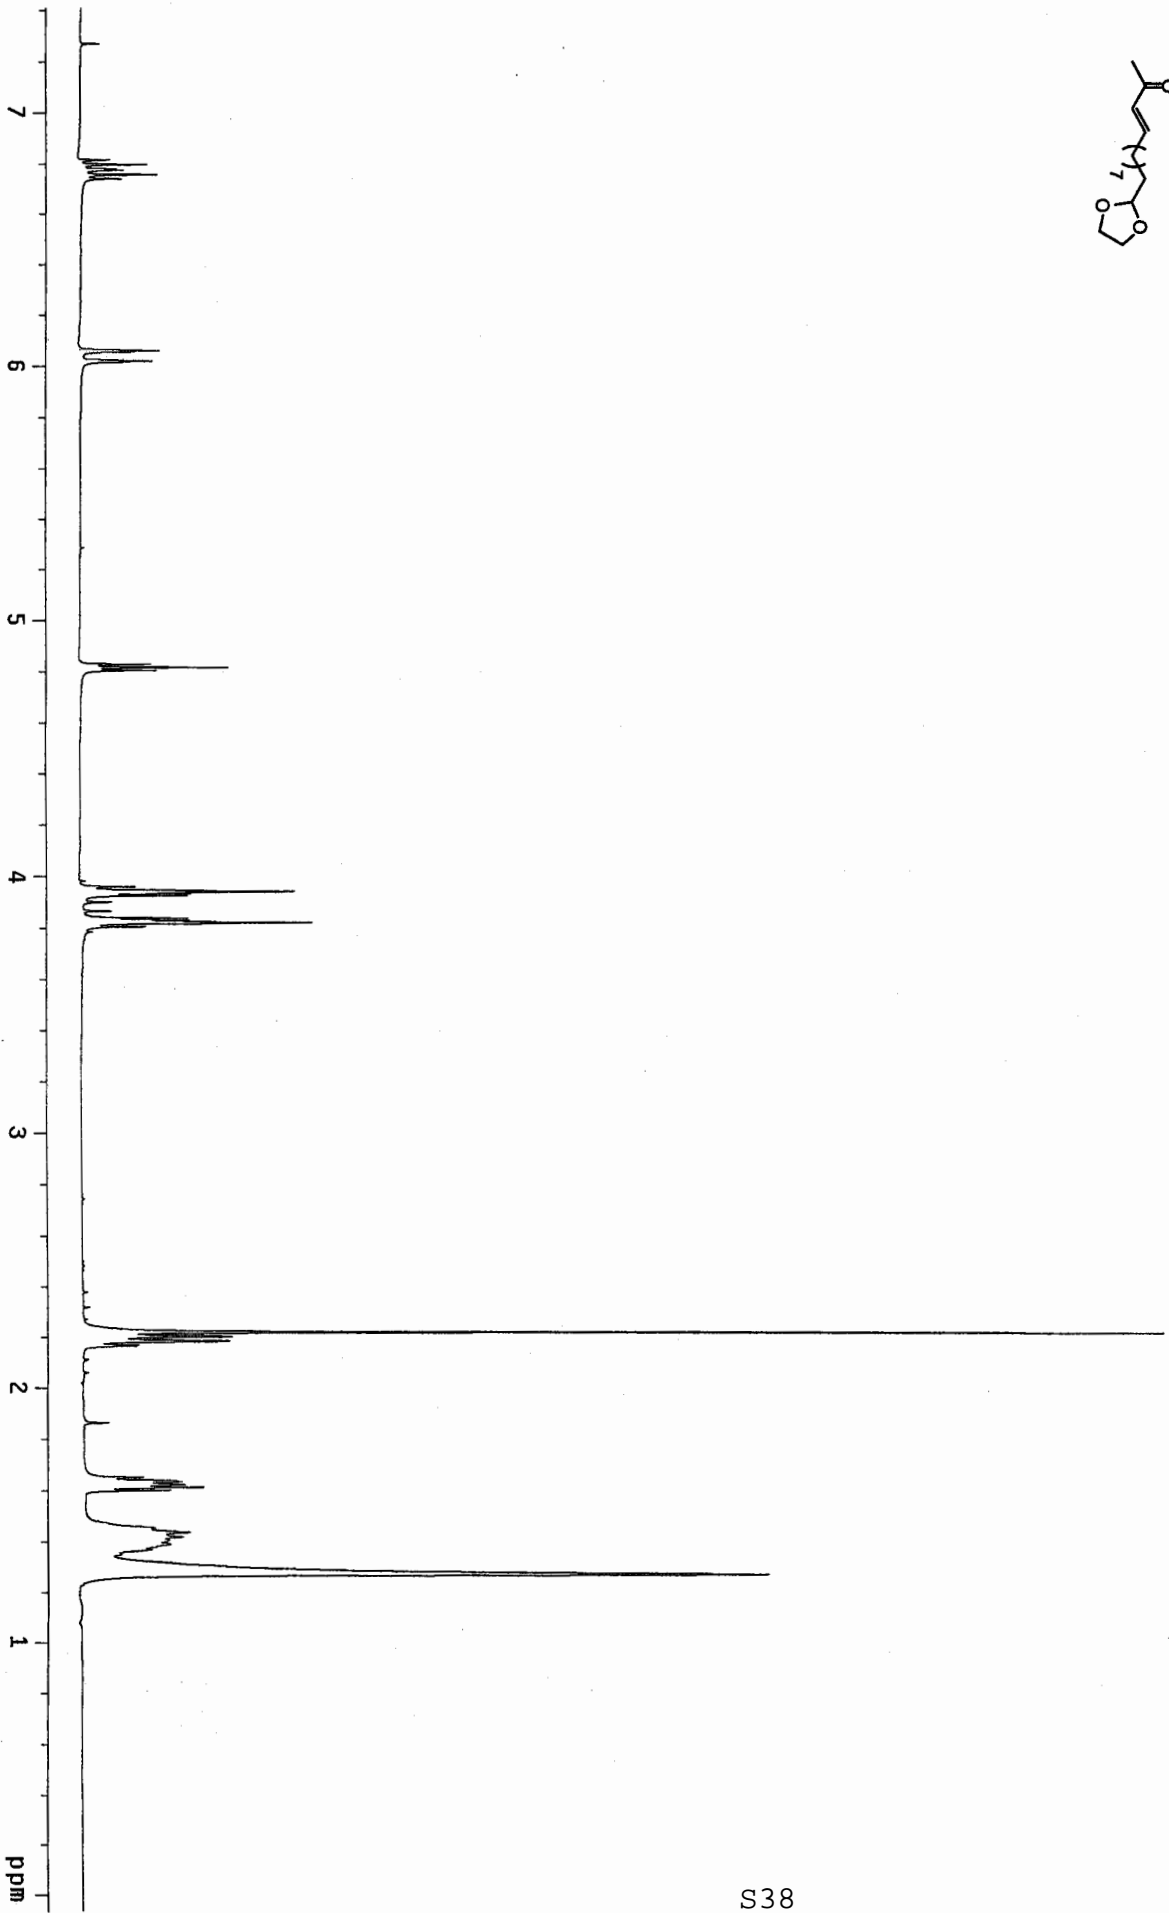

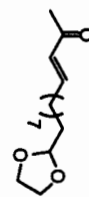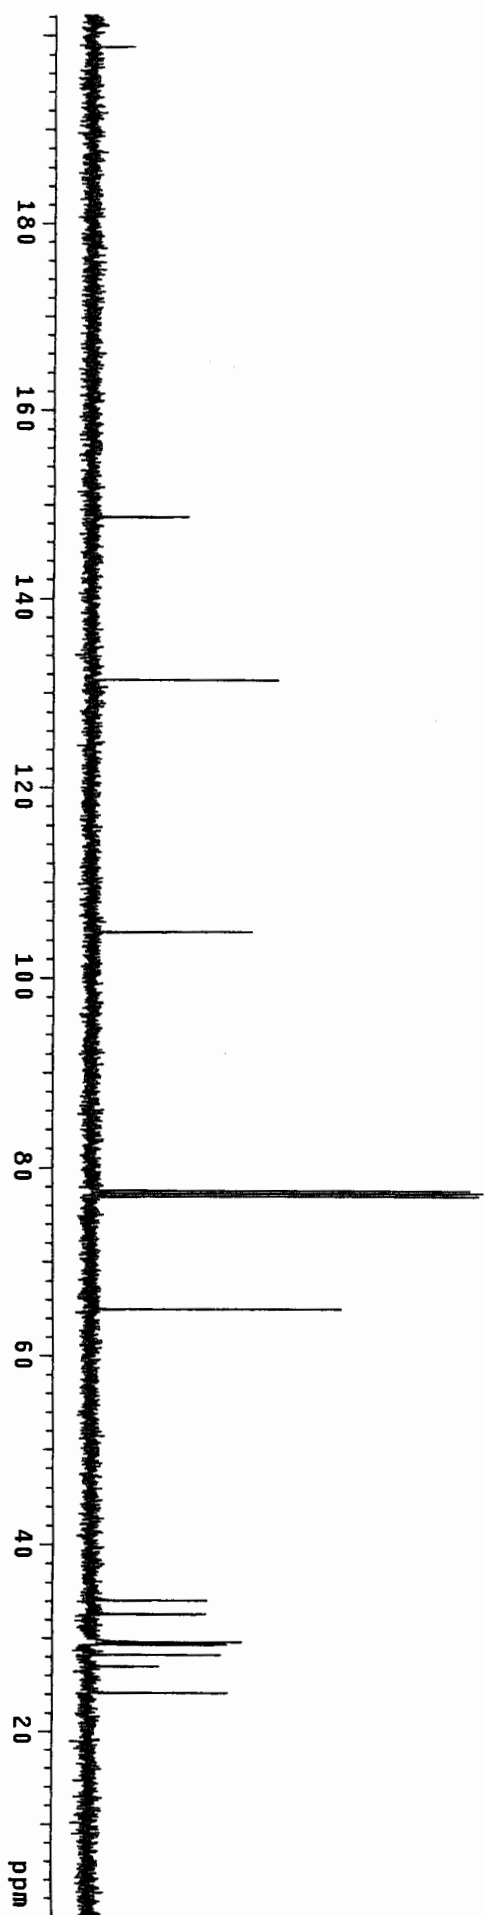

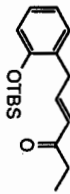

23

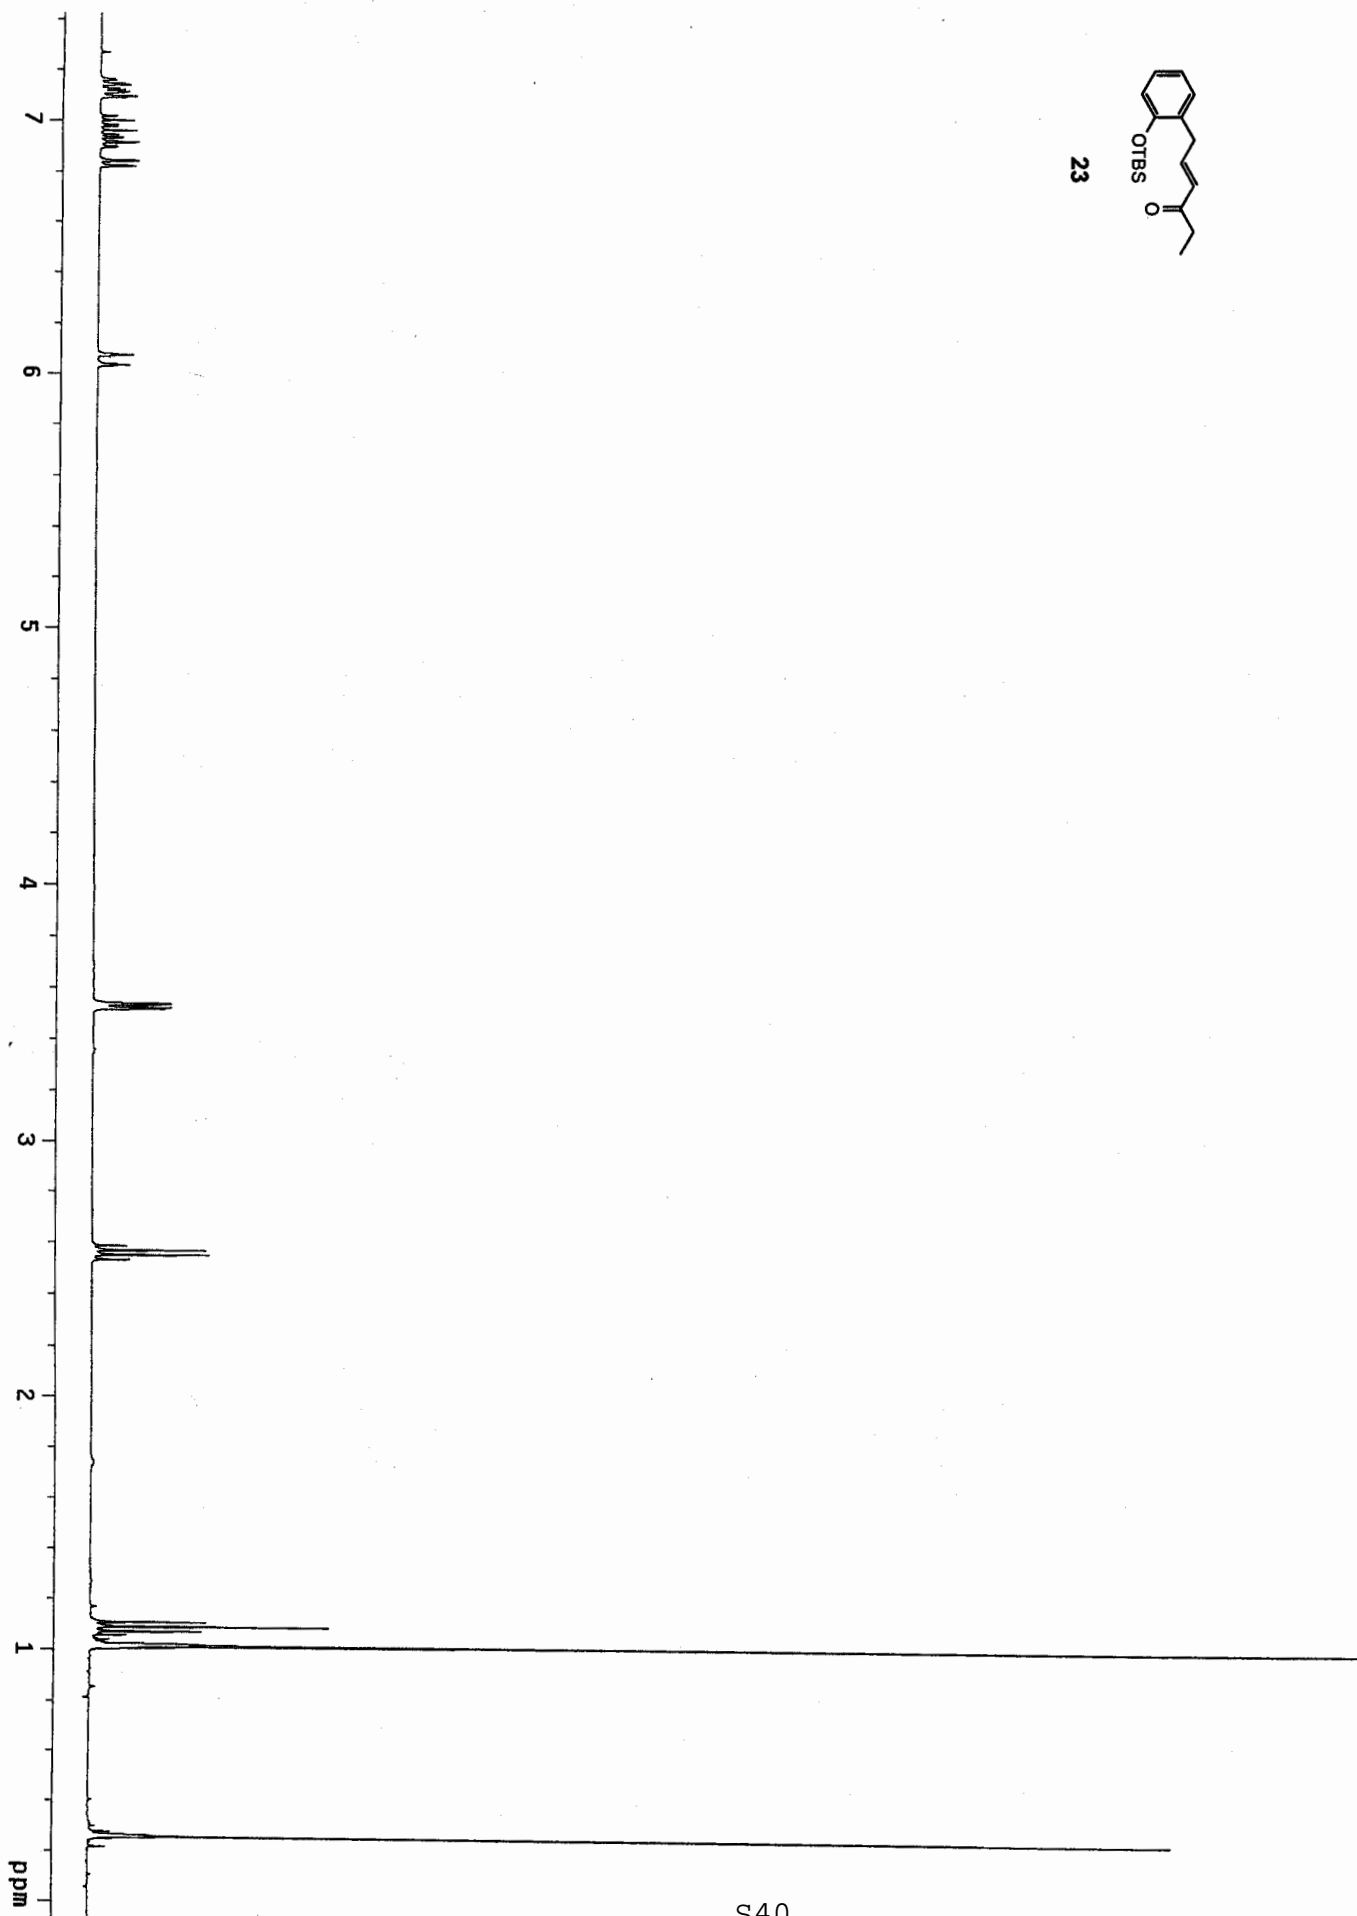



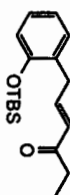

23

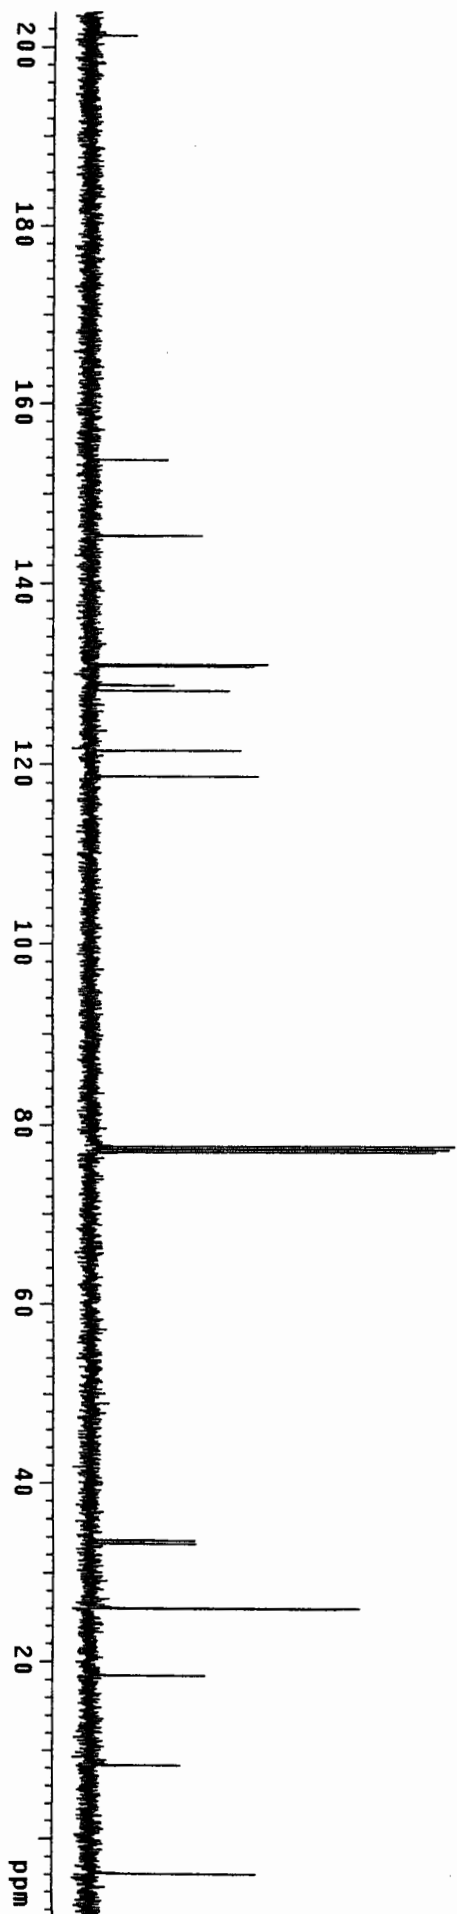

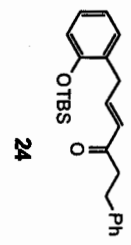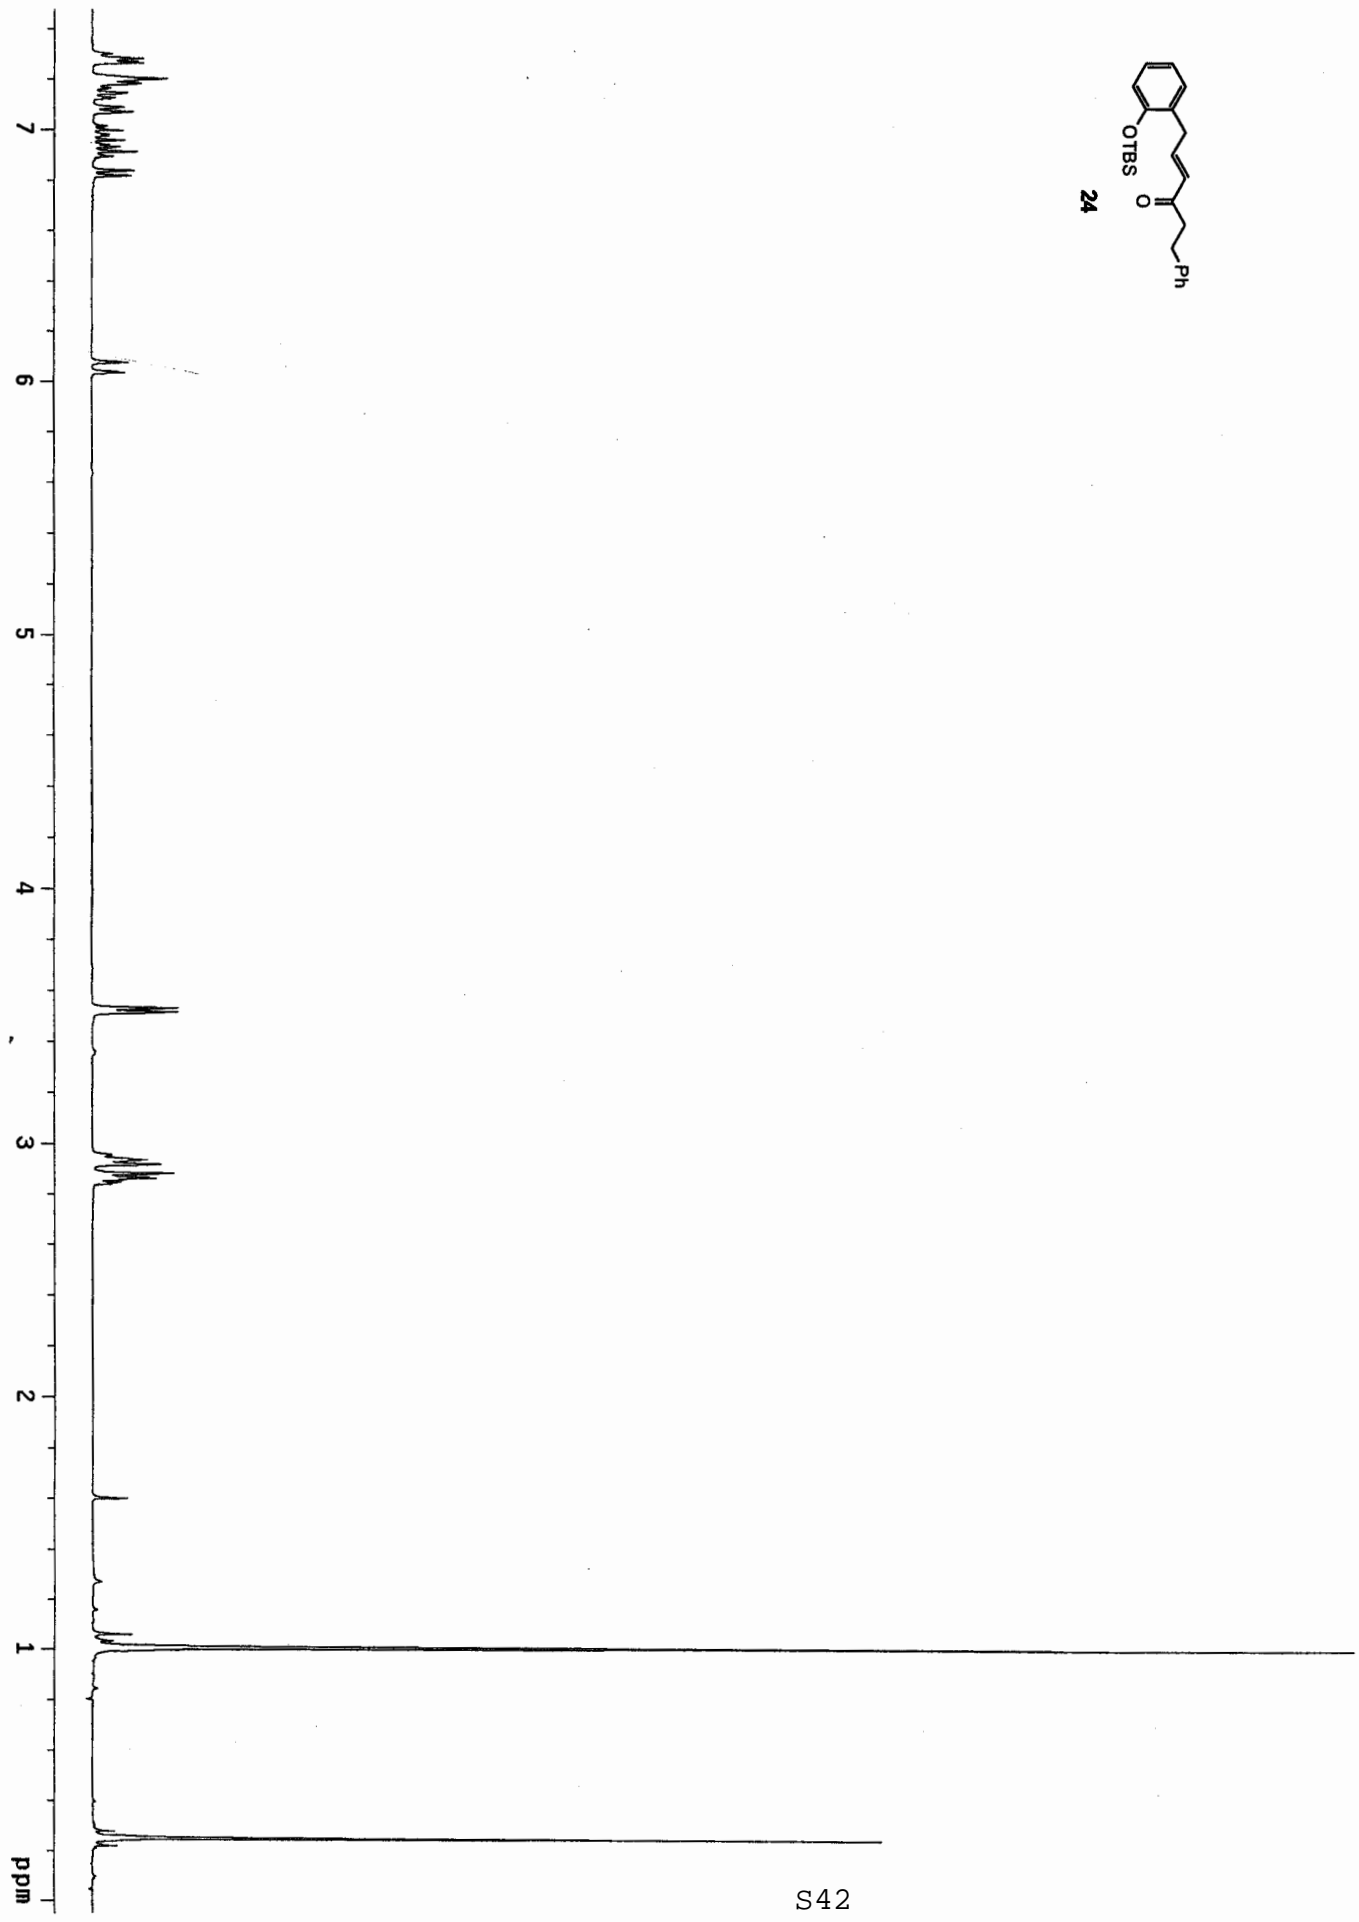

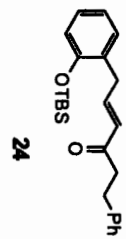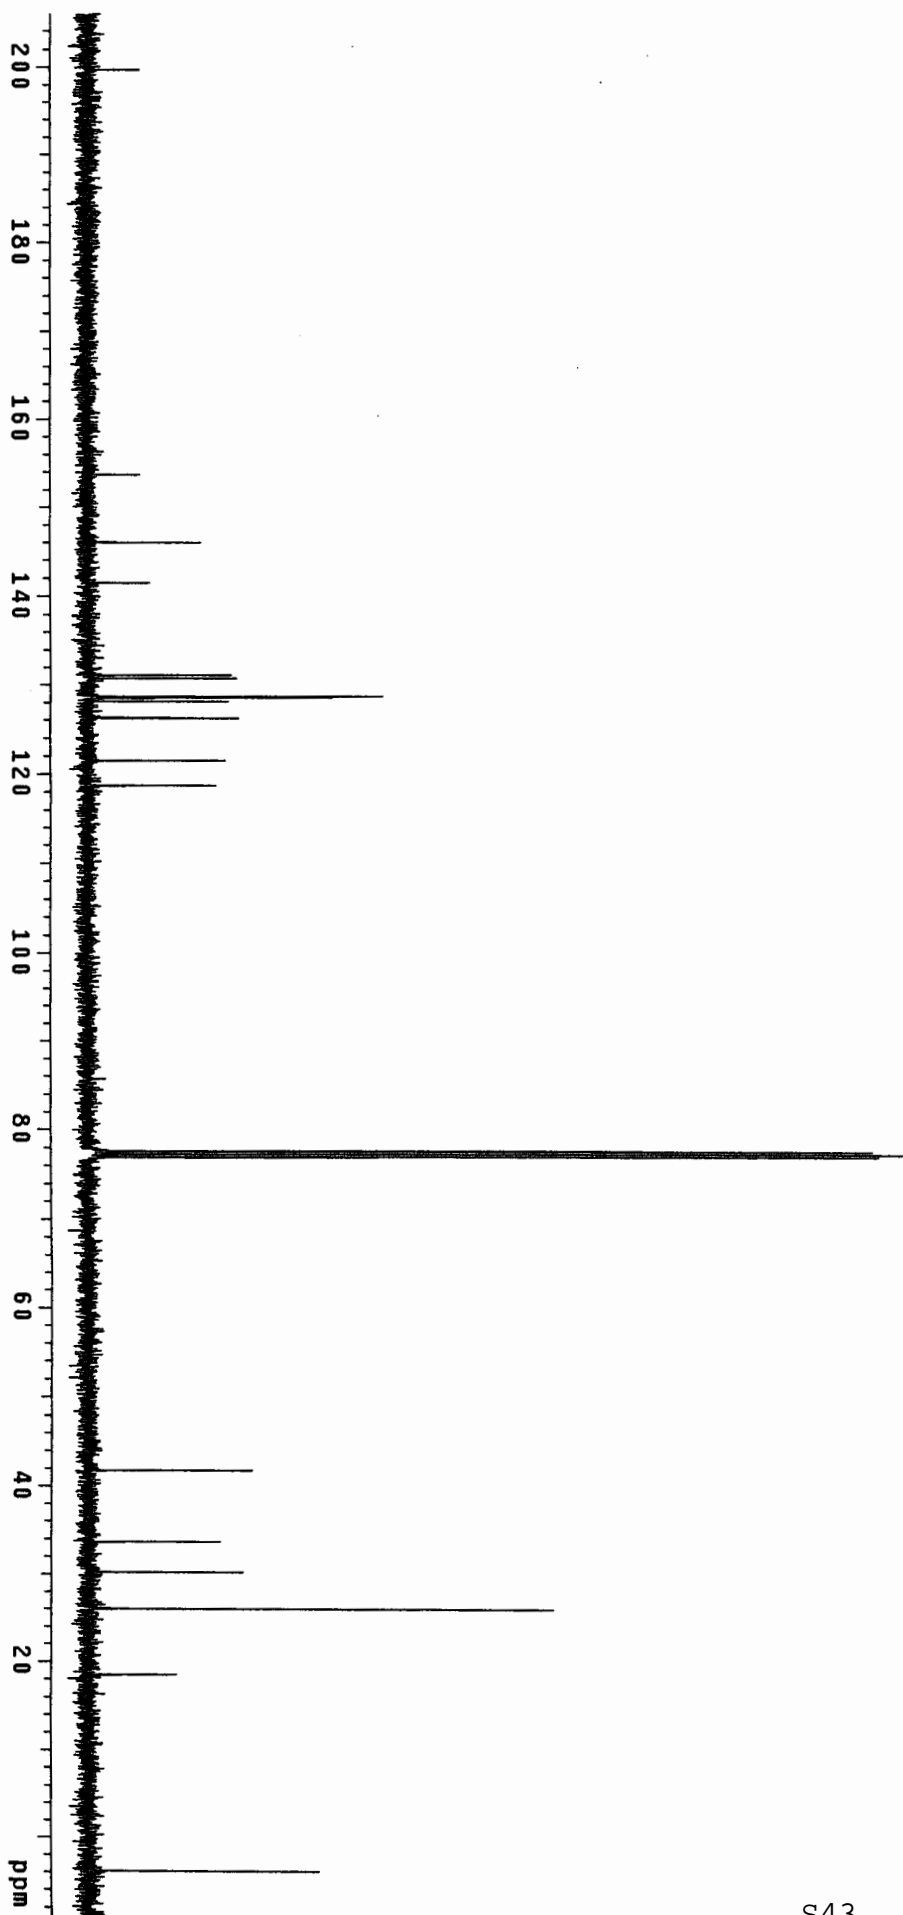

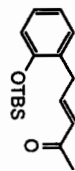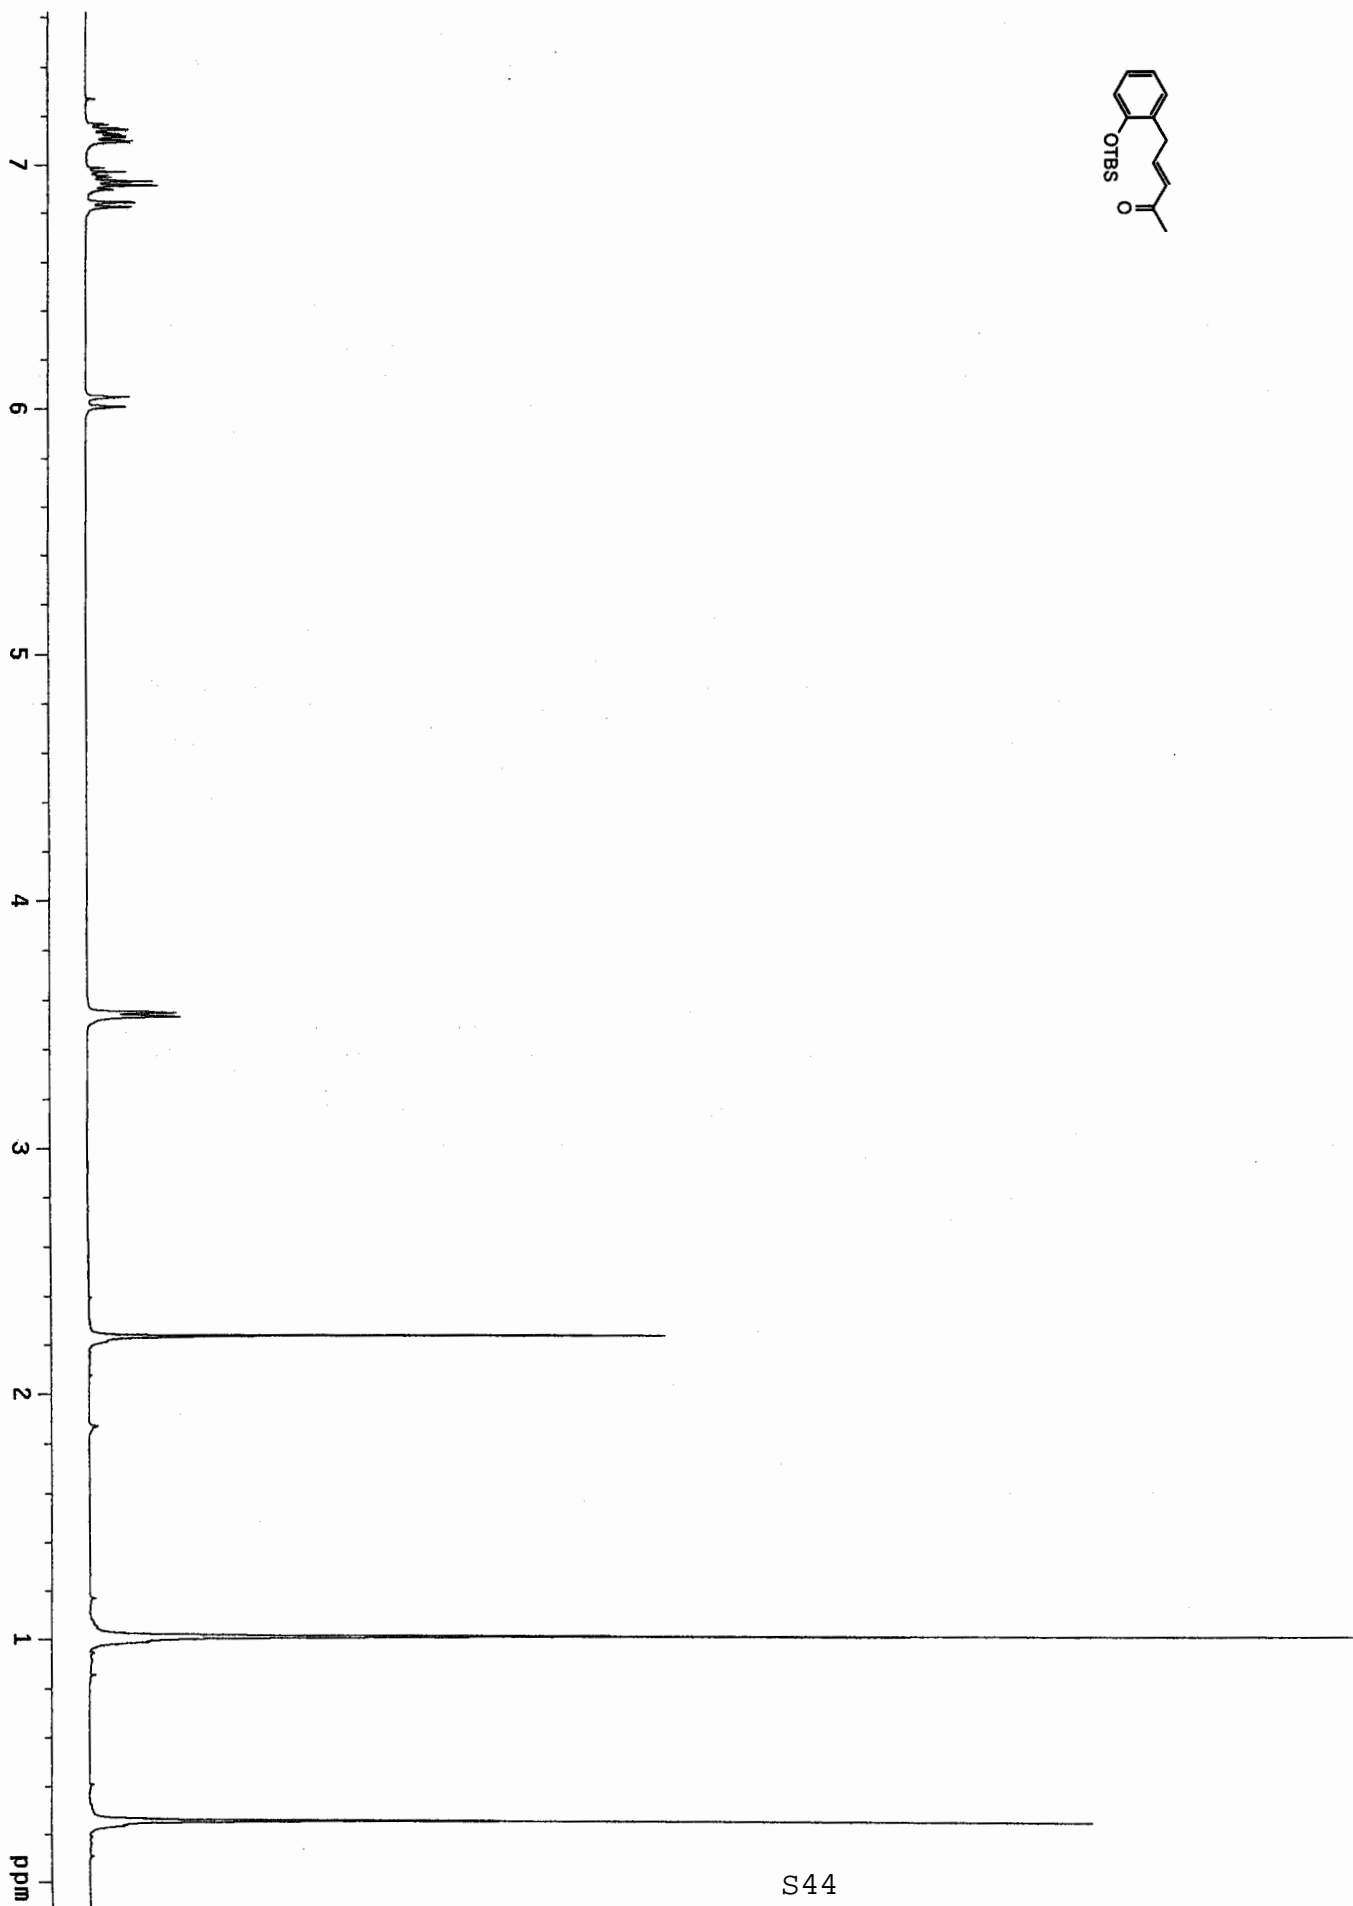

Table 7, entry 1

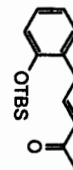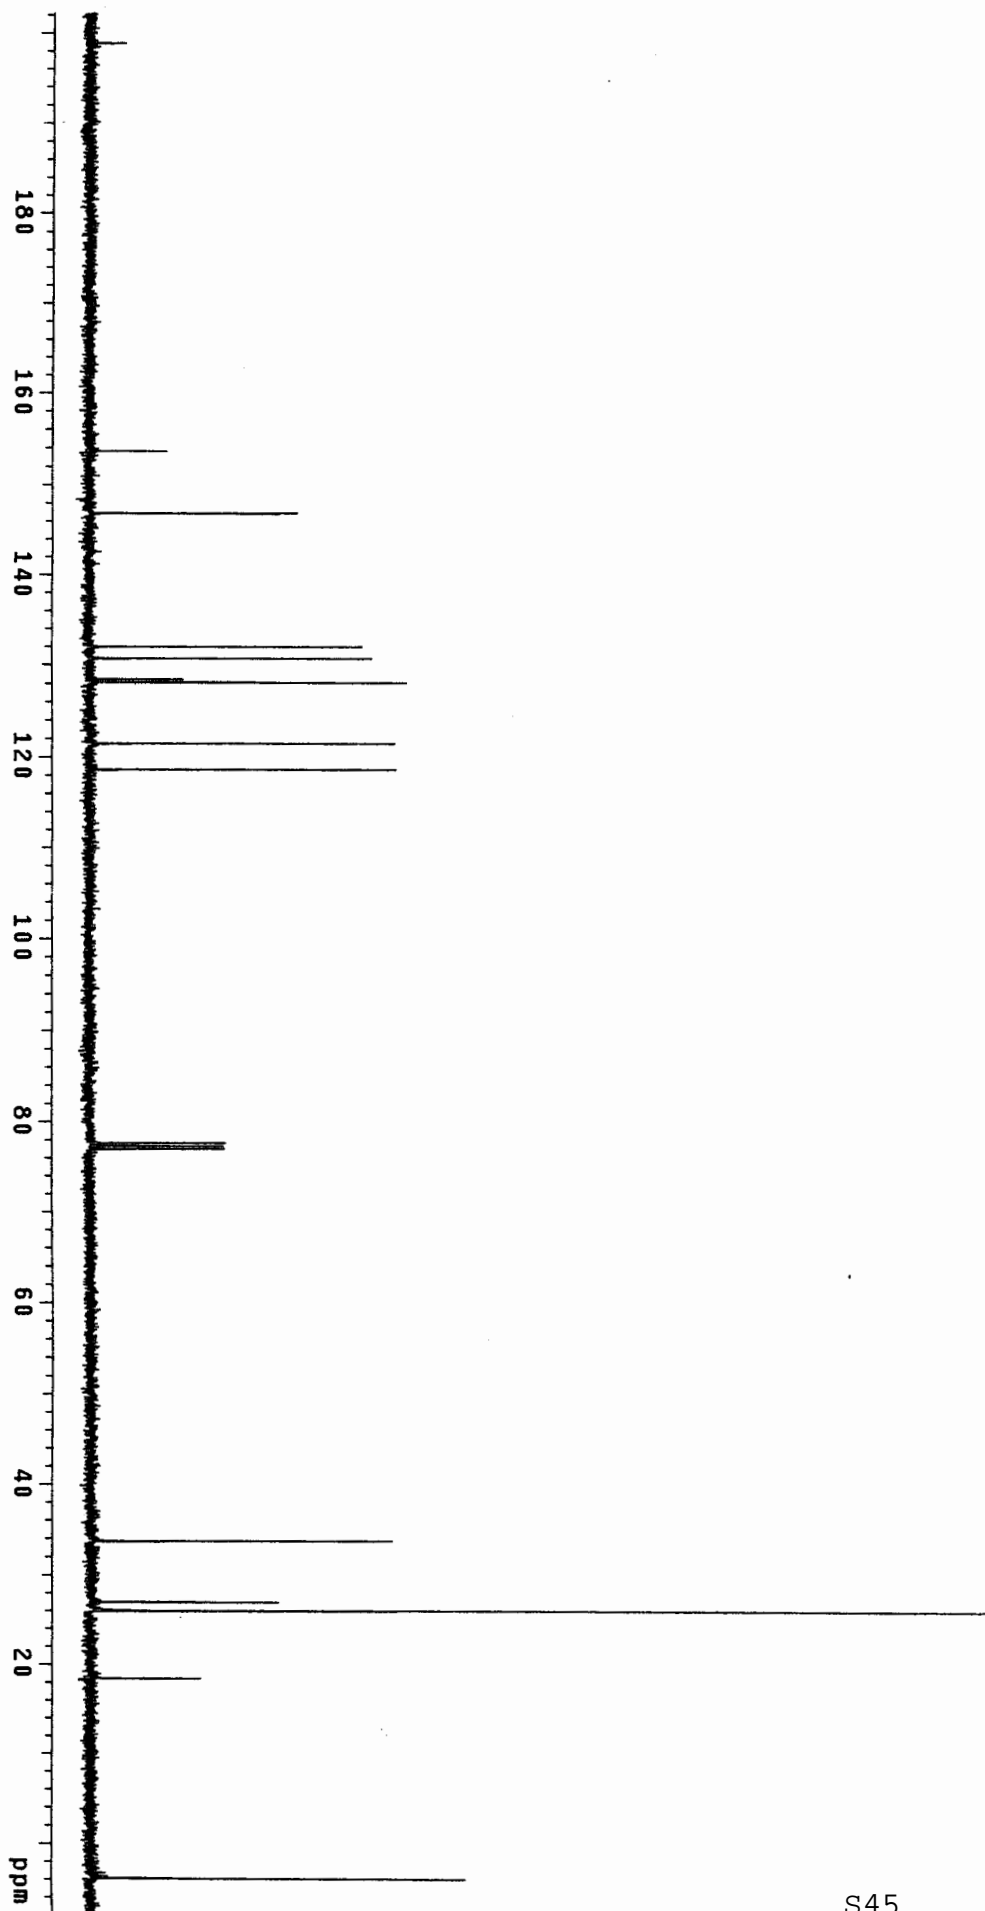

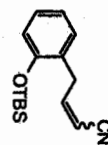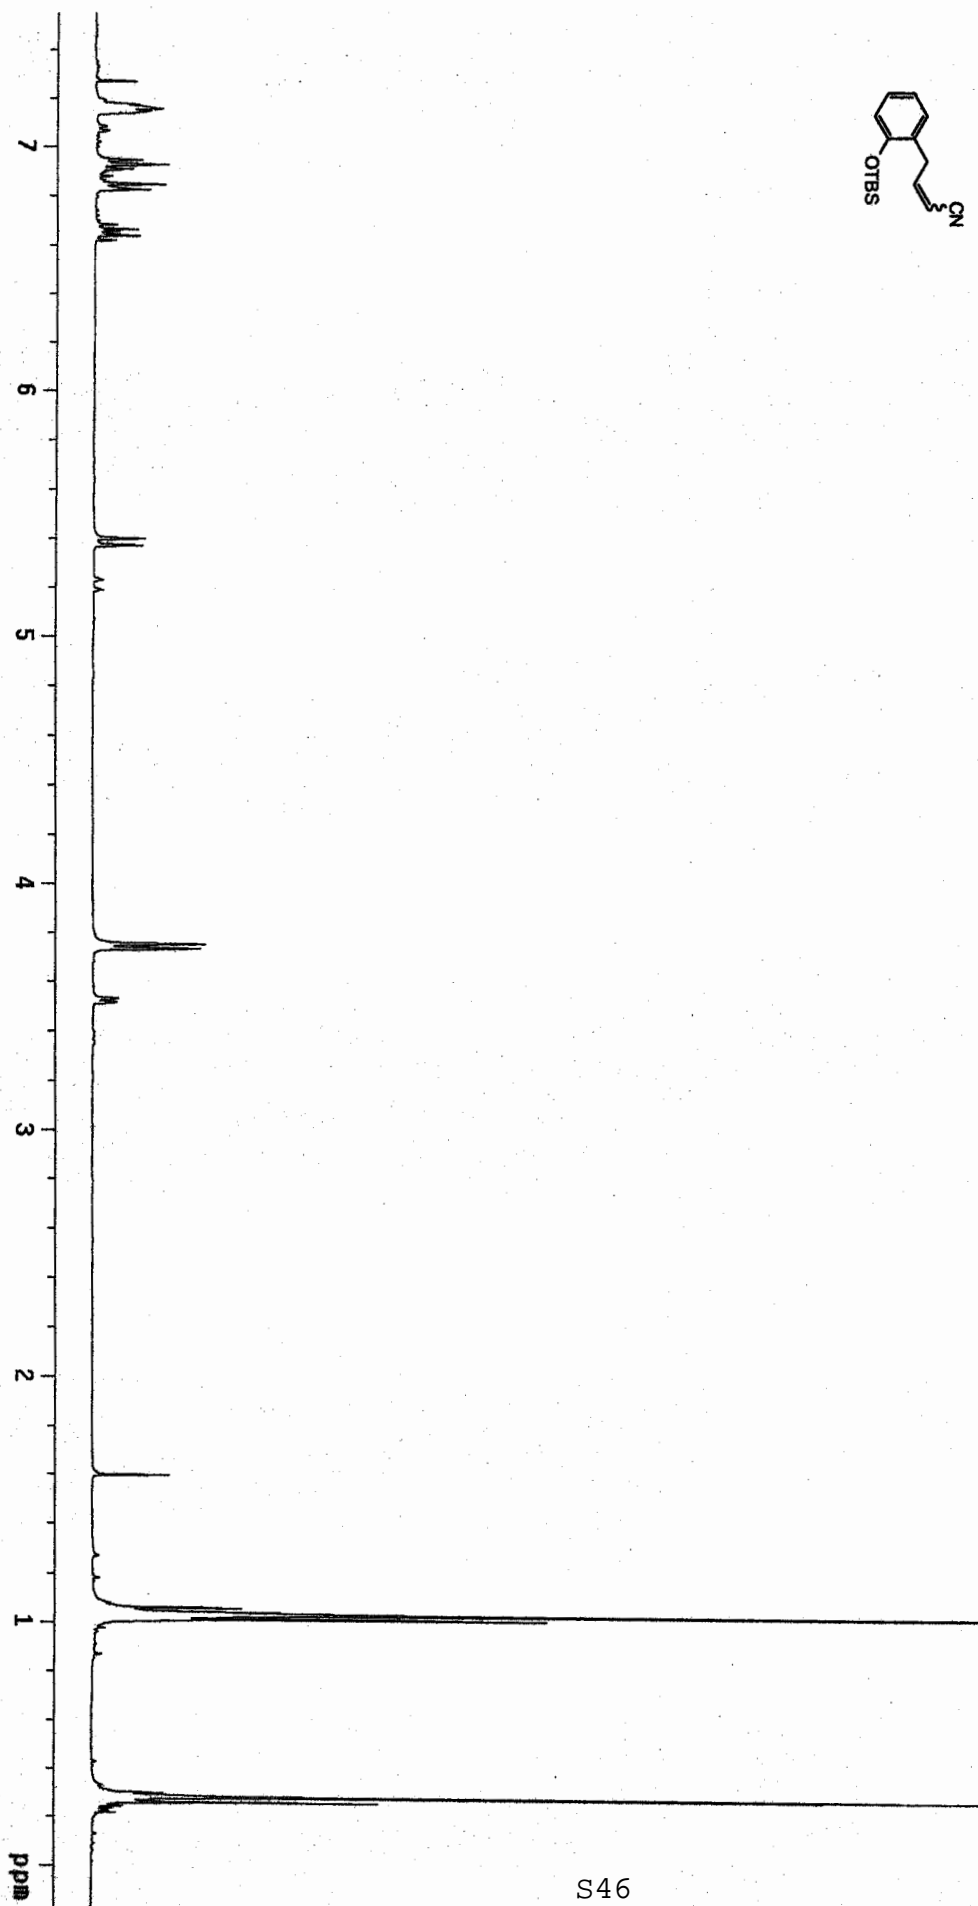

Table 7, entry 2

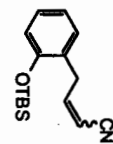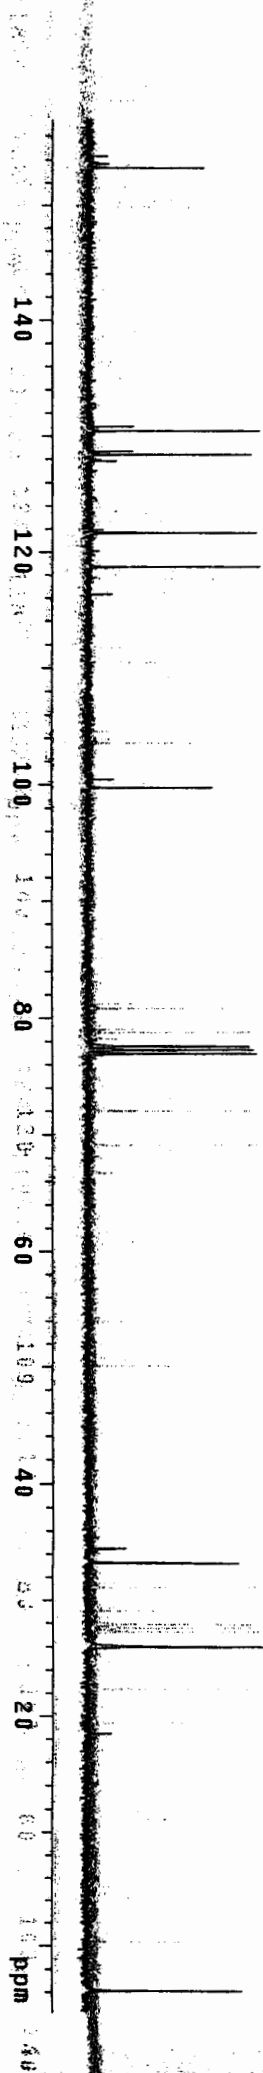

Table 7, entry 3

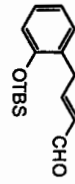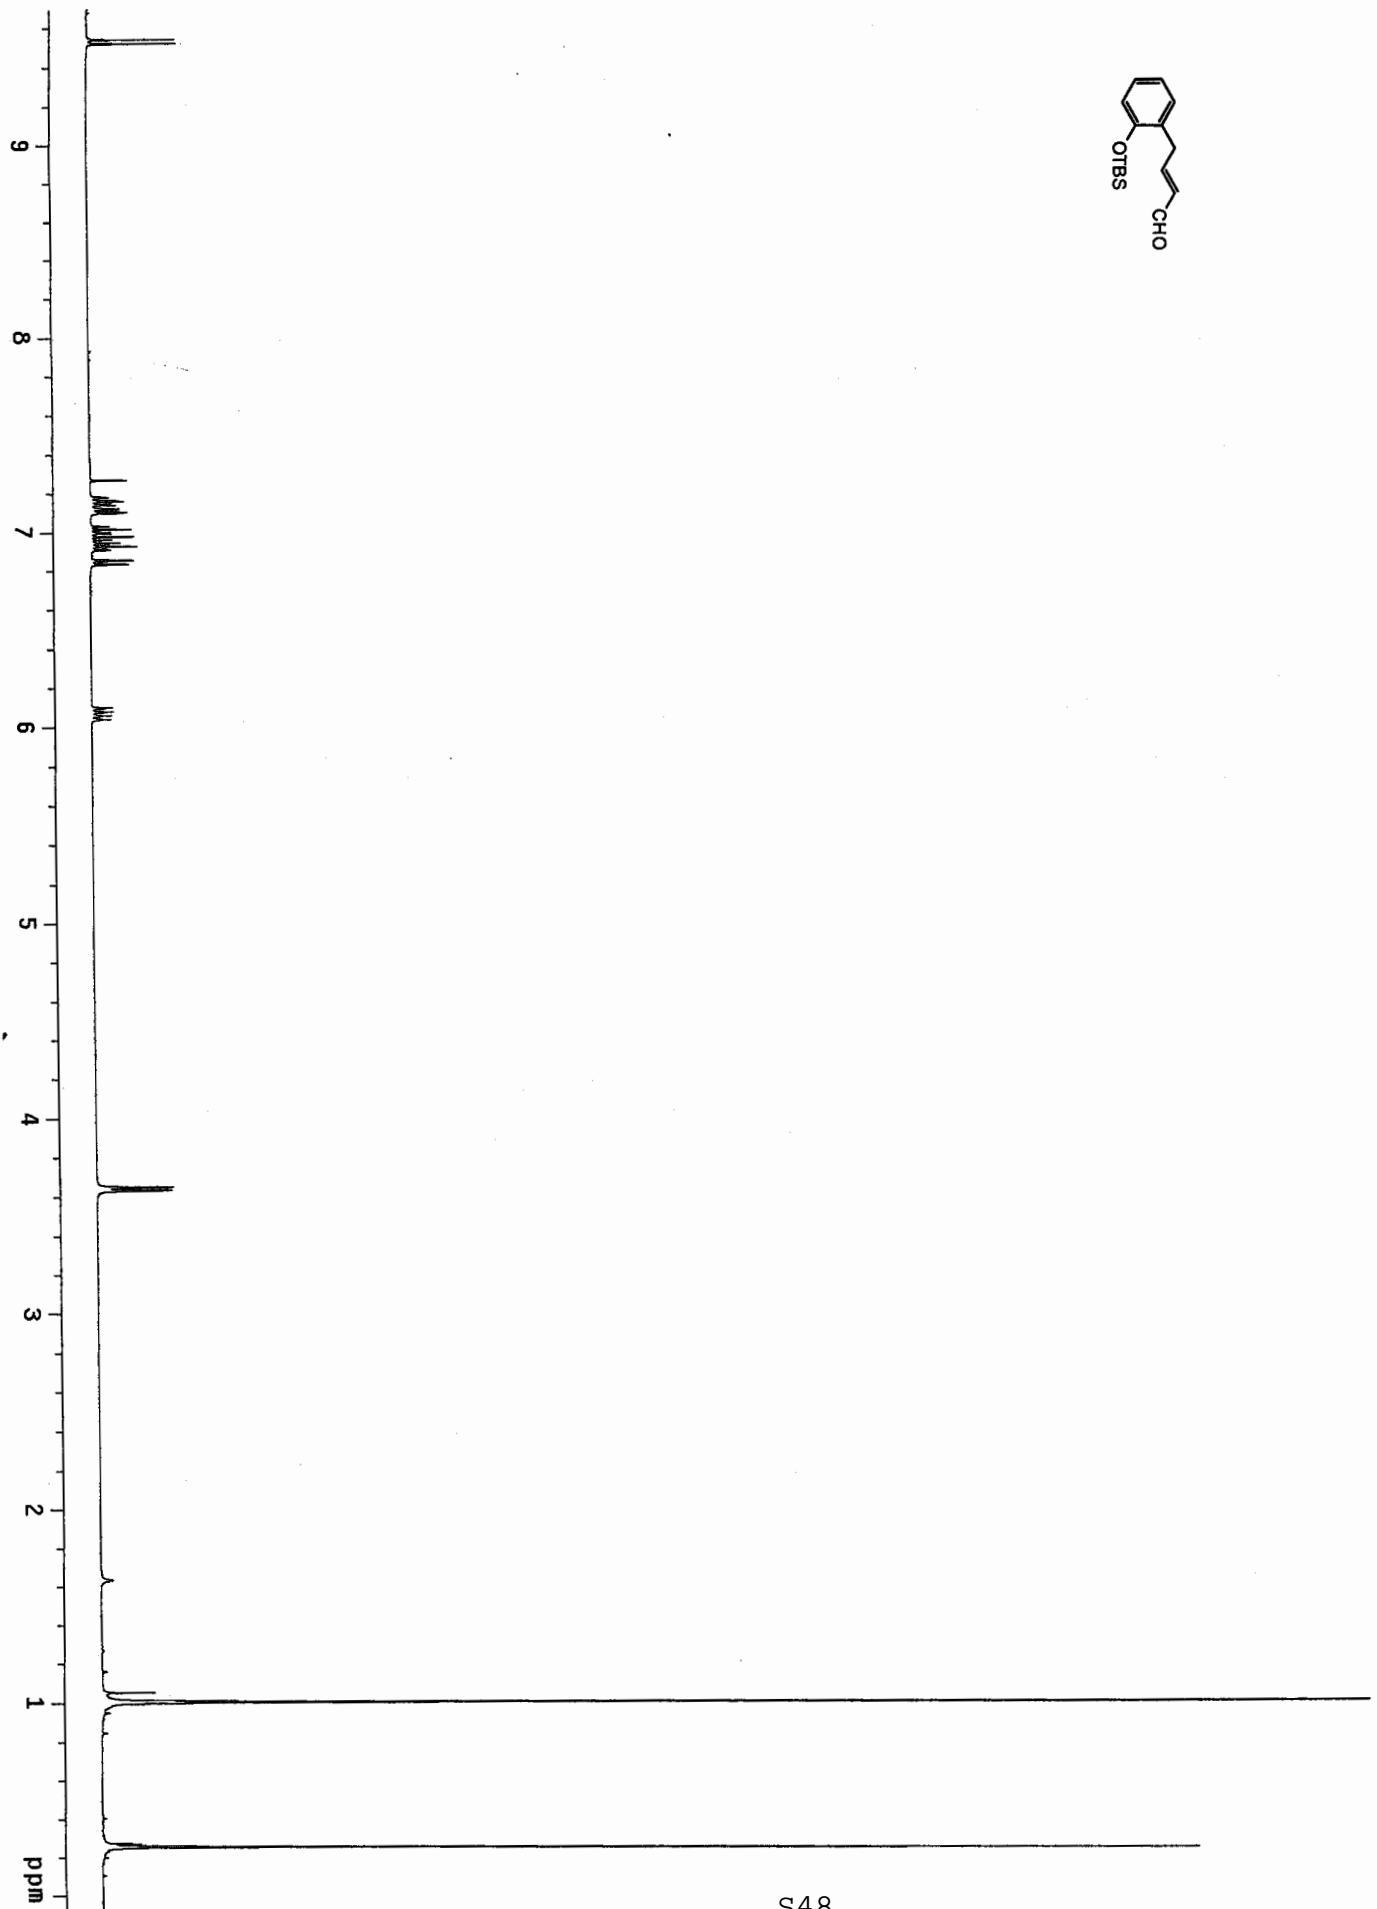



Table 7, entry 3

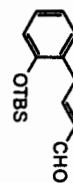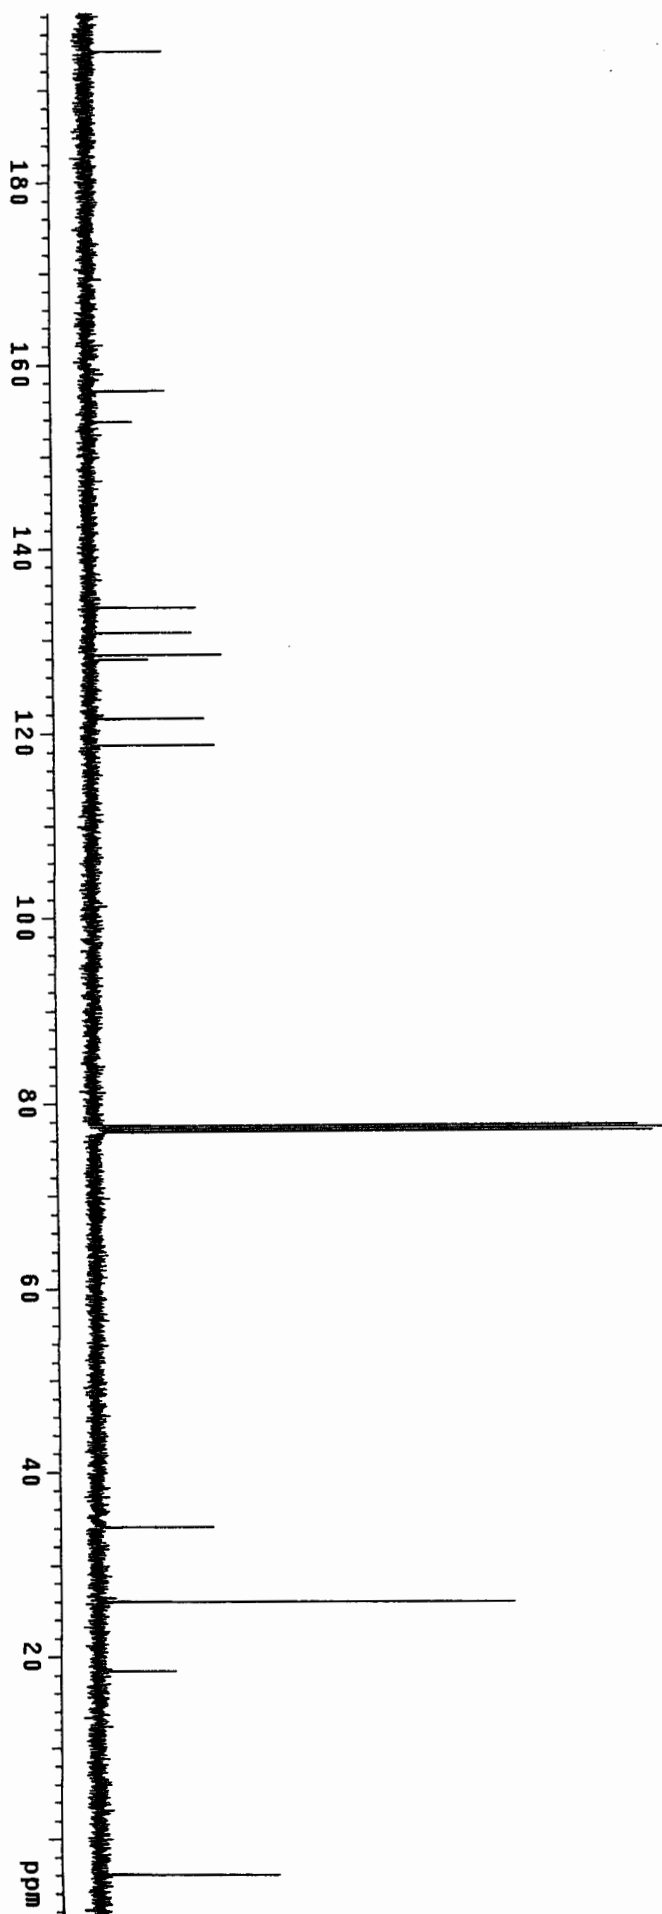

Table 7, entry 4

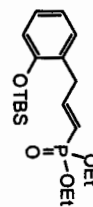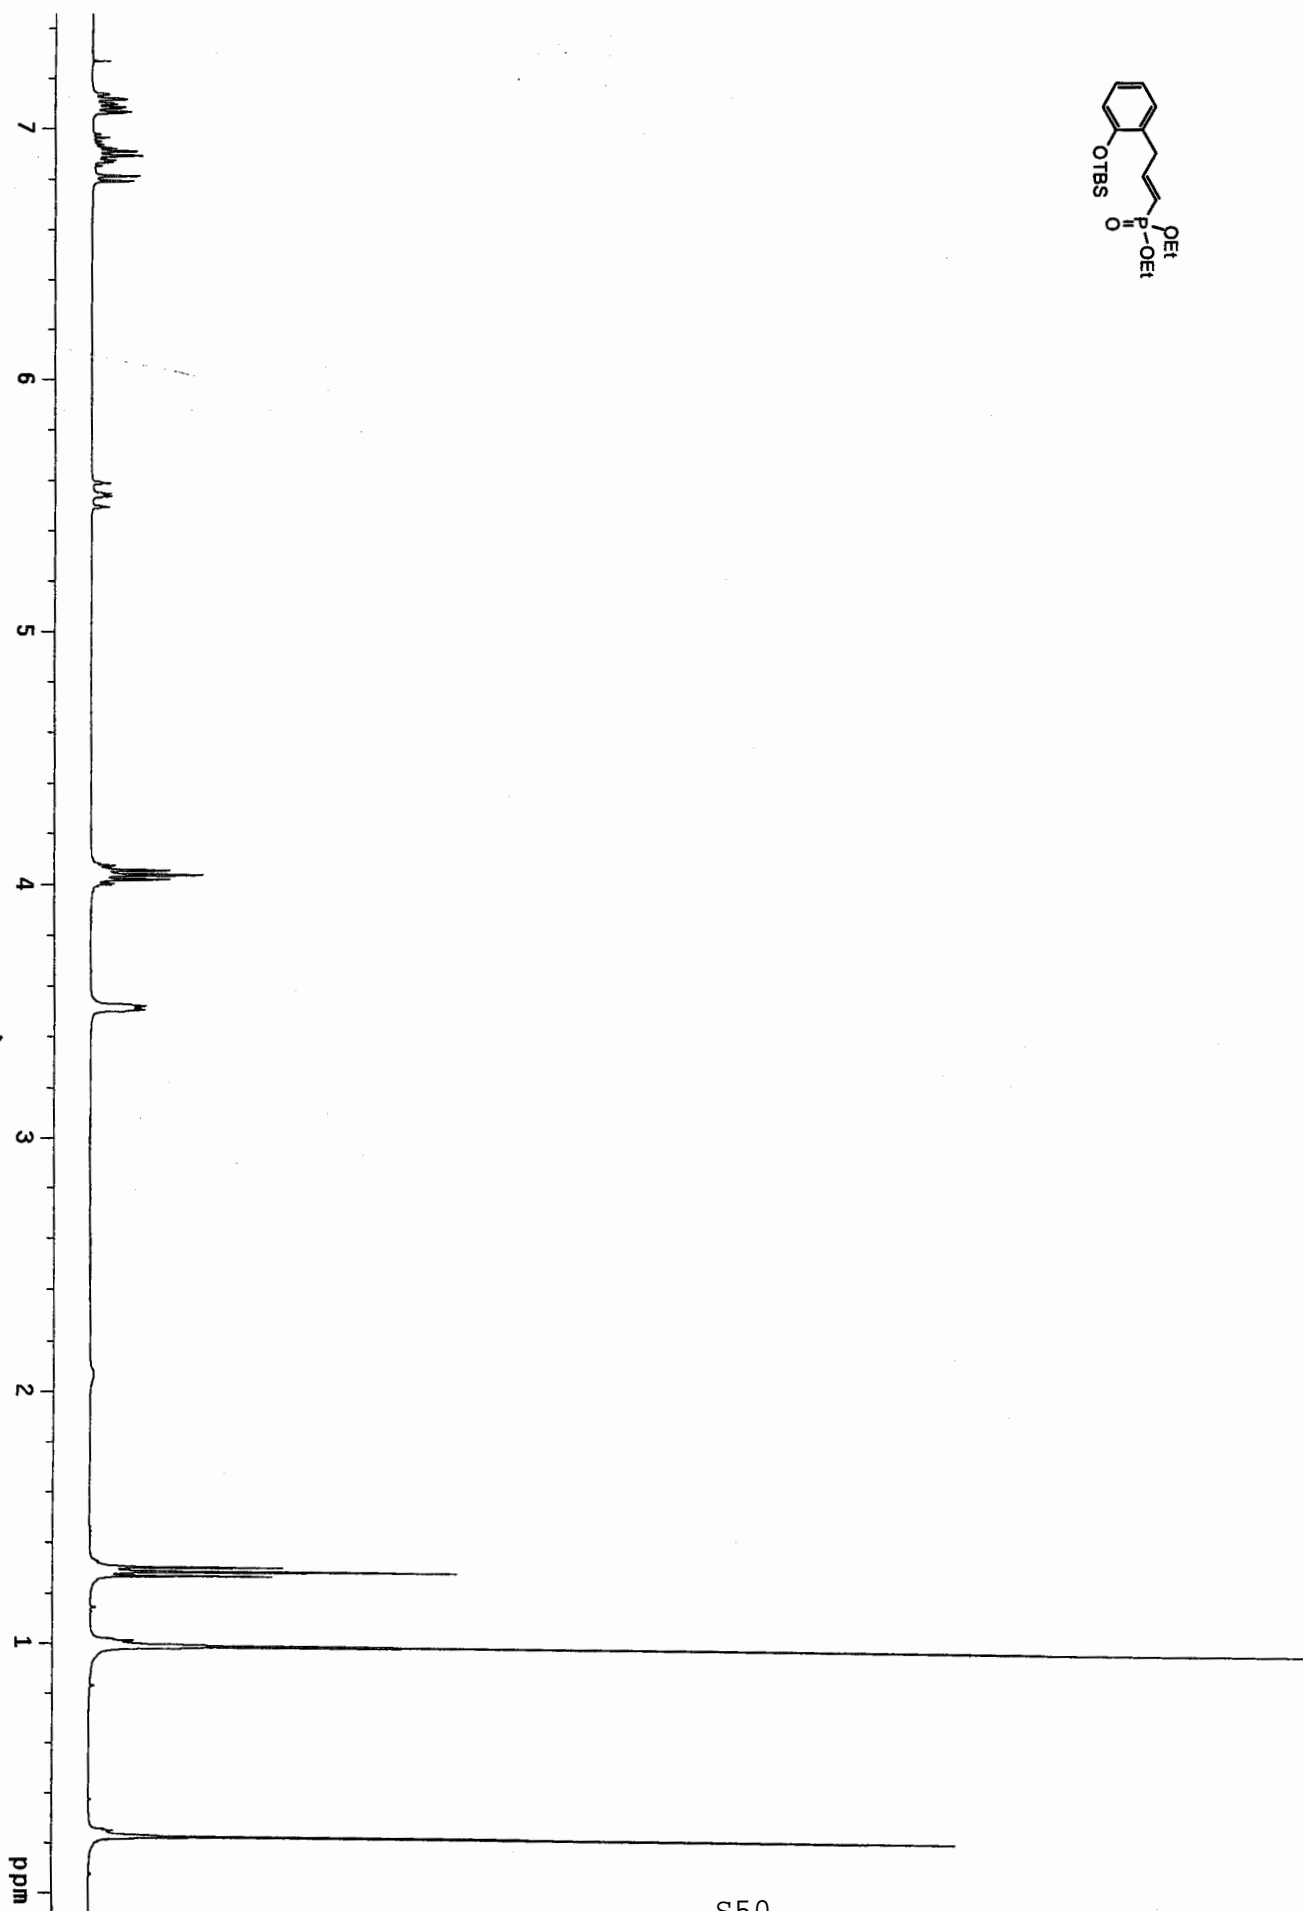

Table 7, entry 4

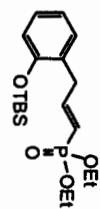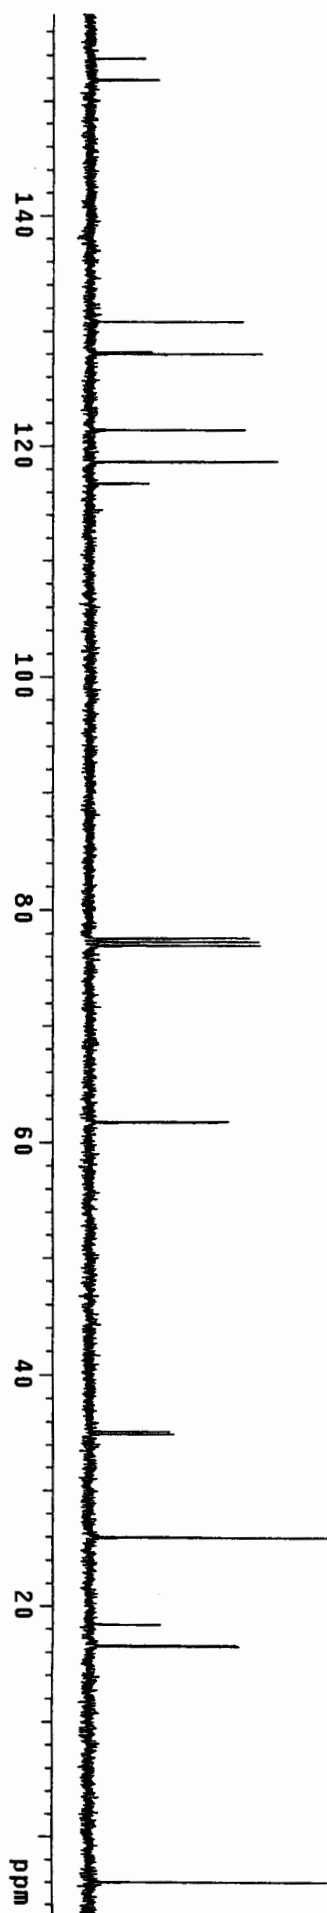

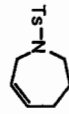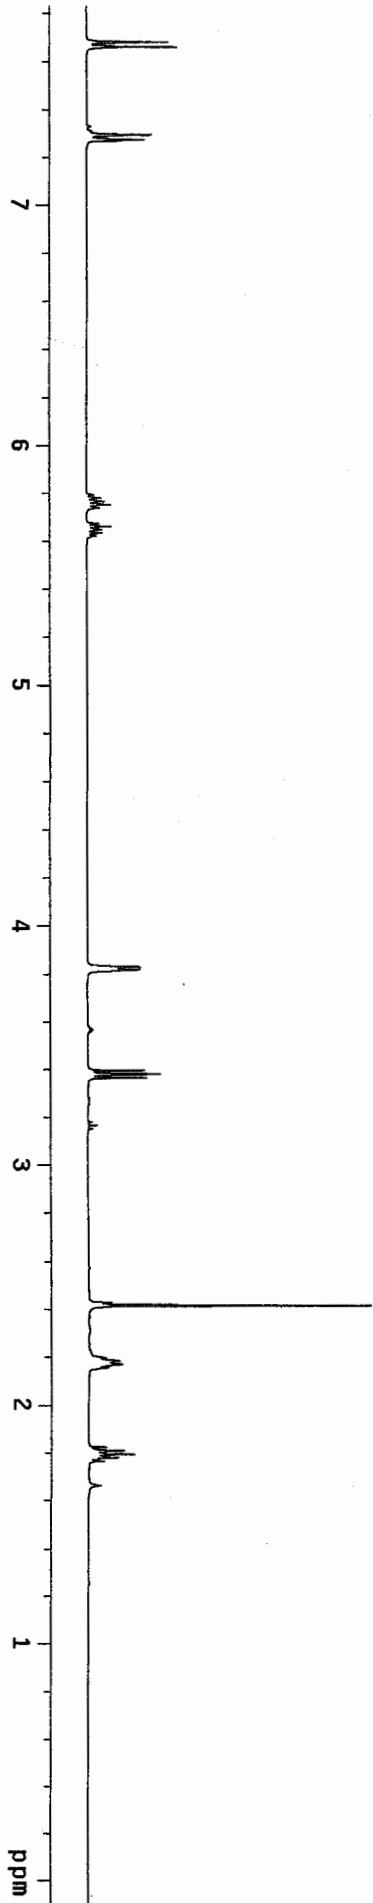

Table 12, entry 1

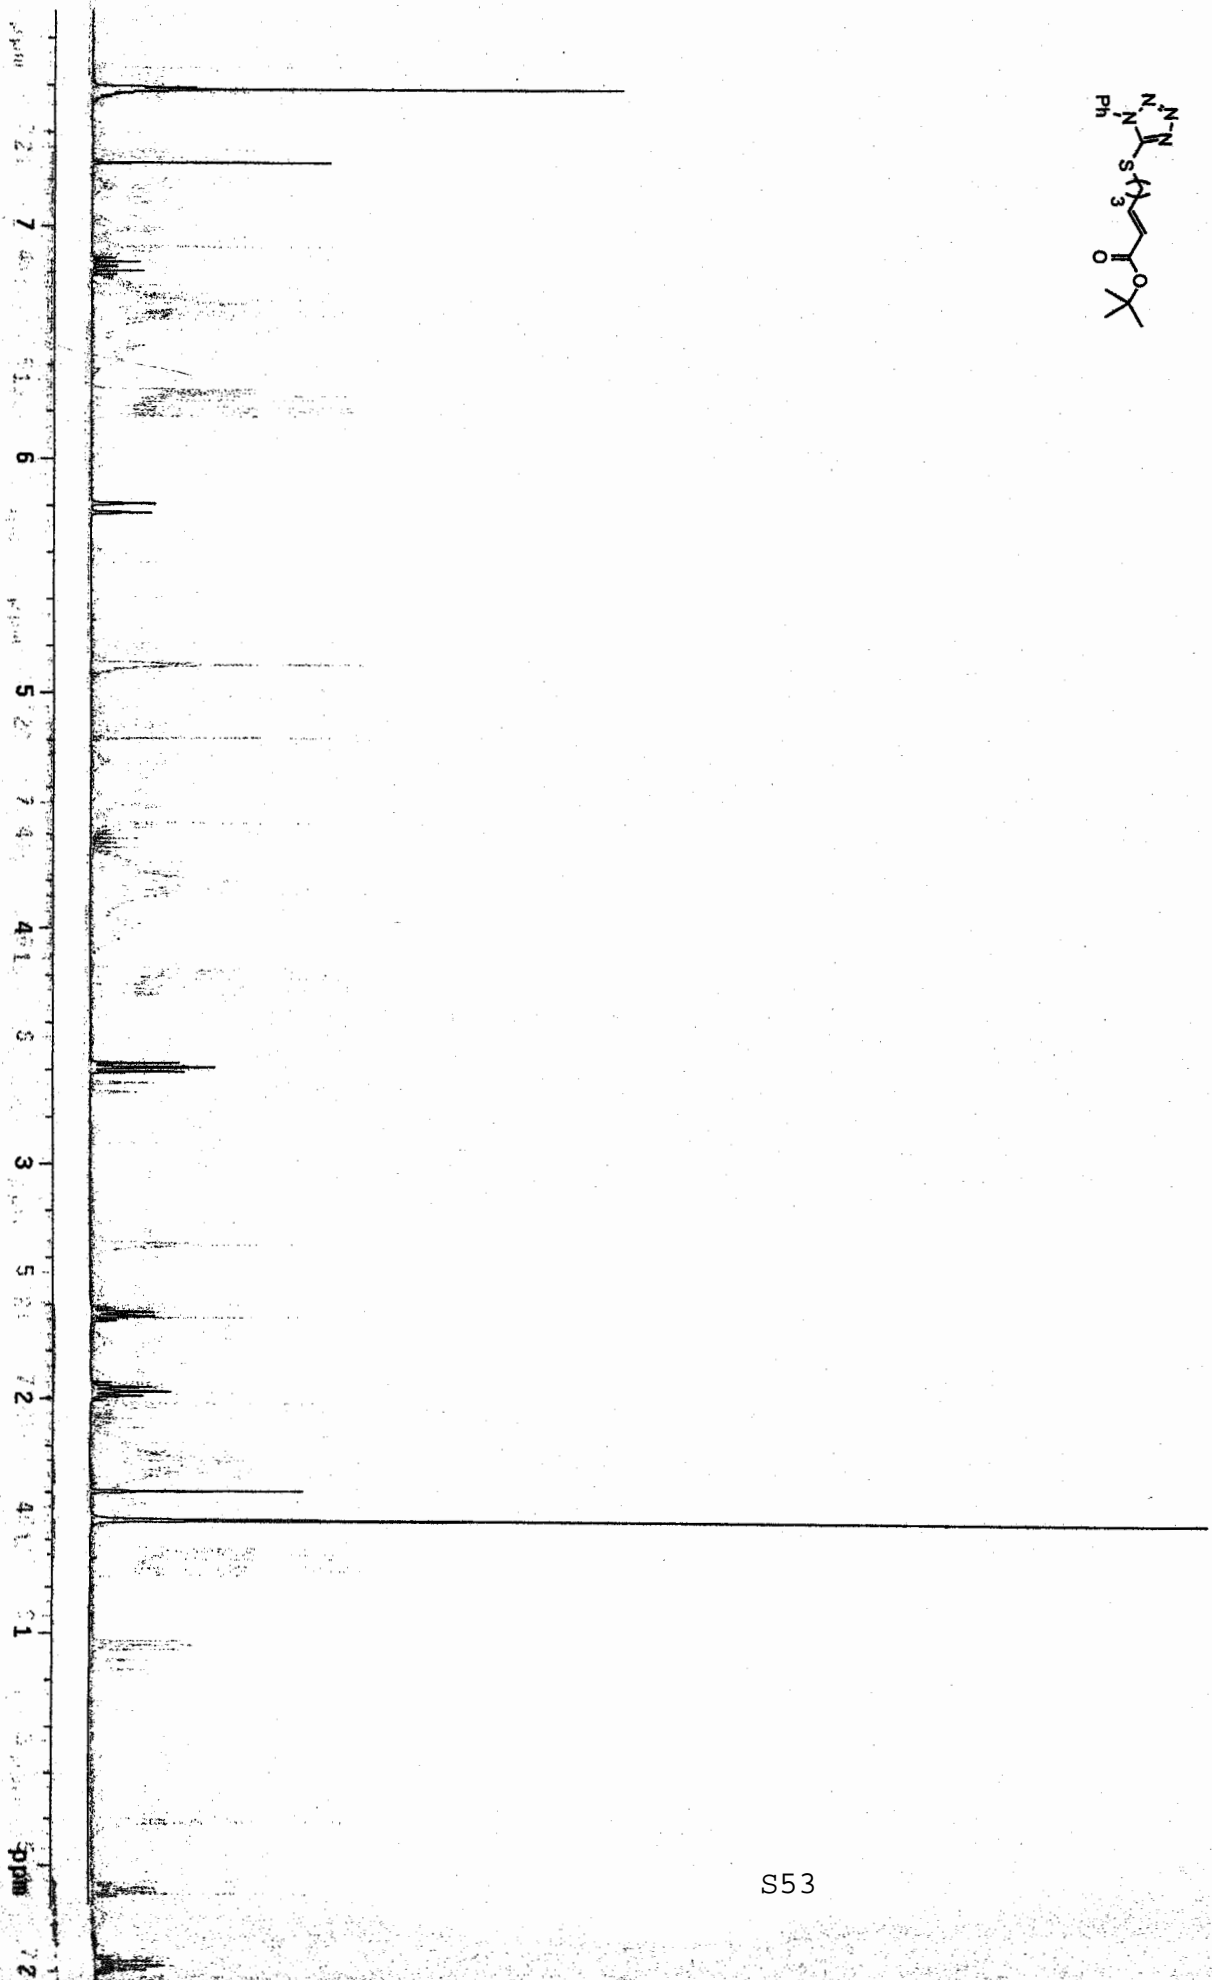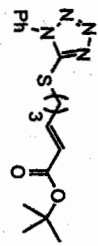

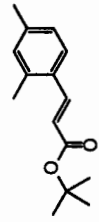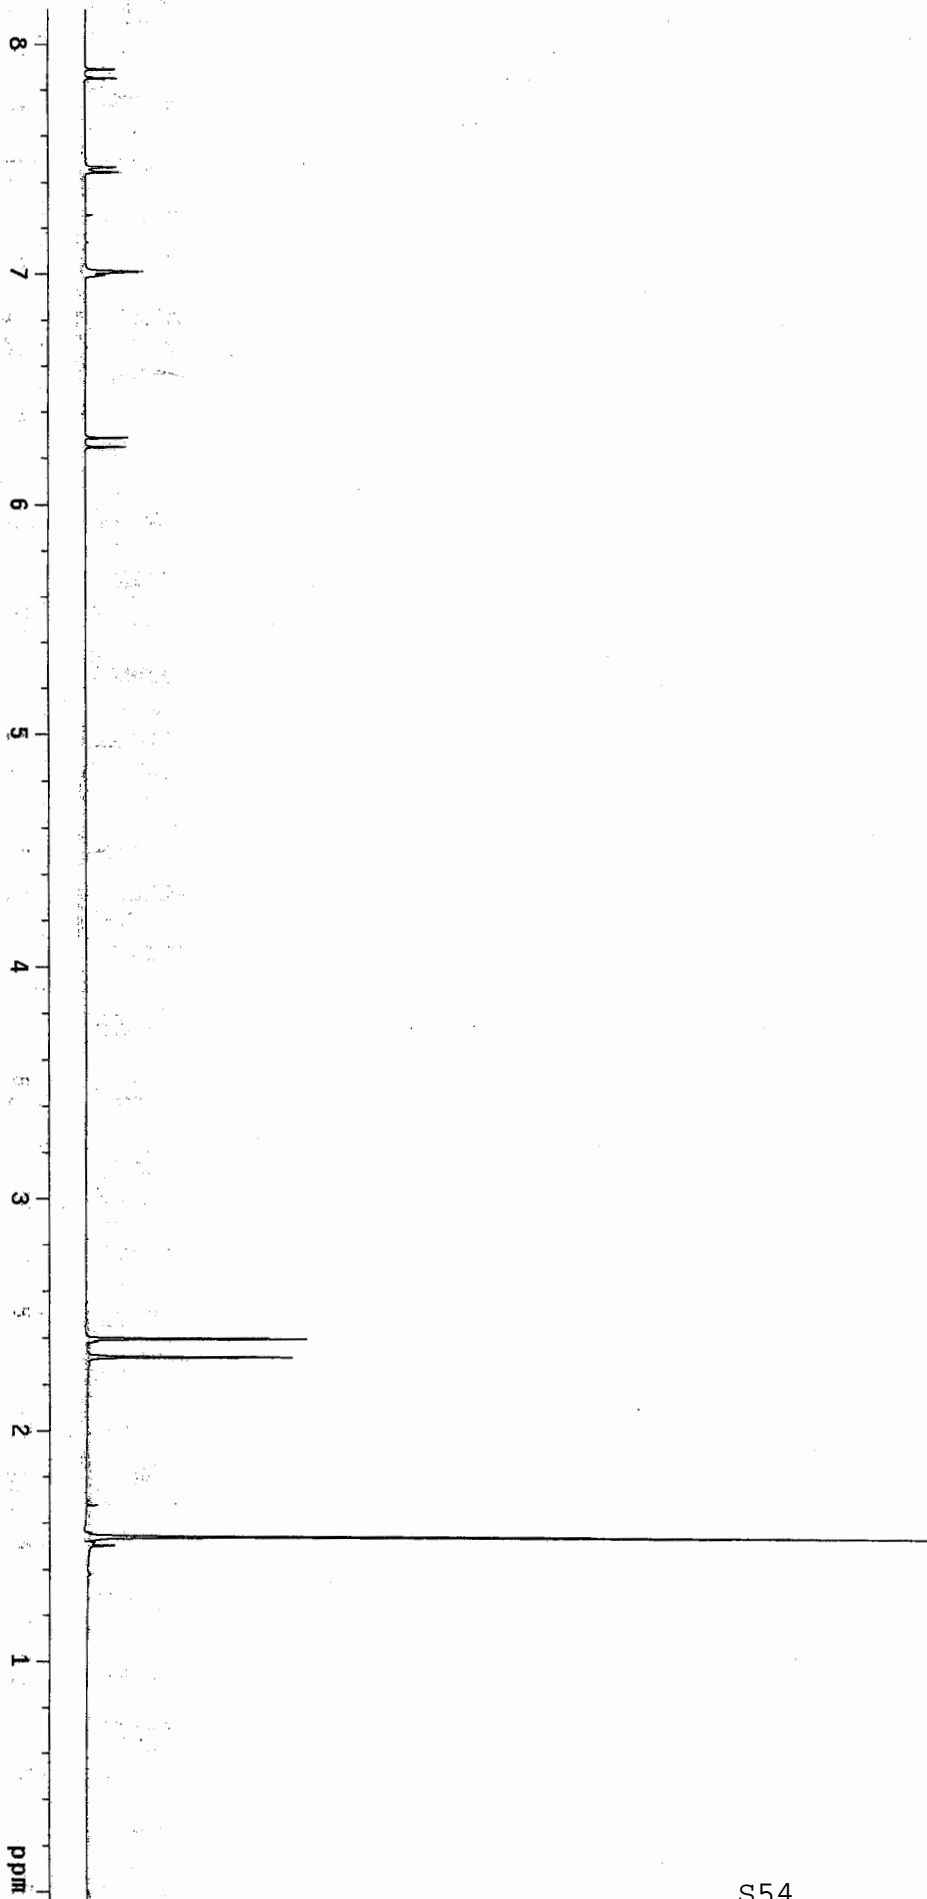

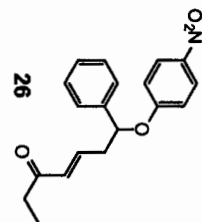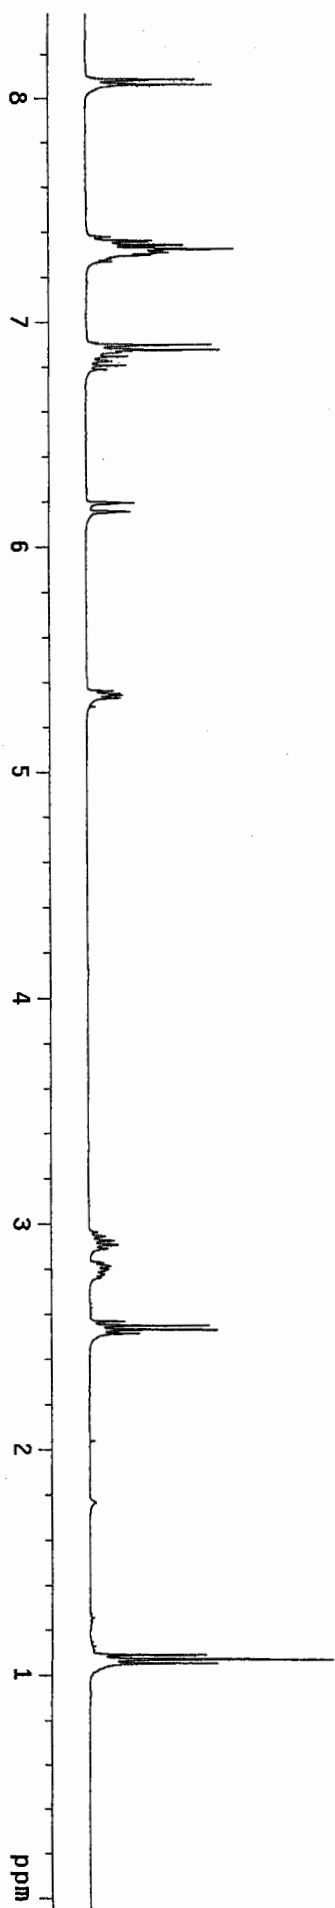

Table 5, entry 1  
(starting material)

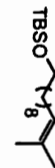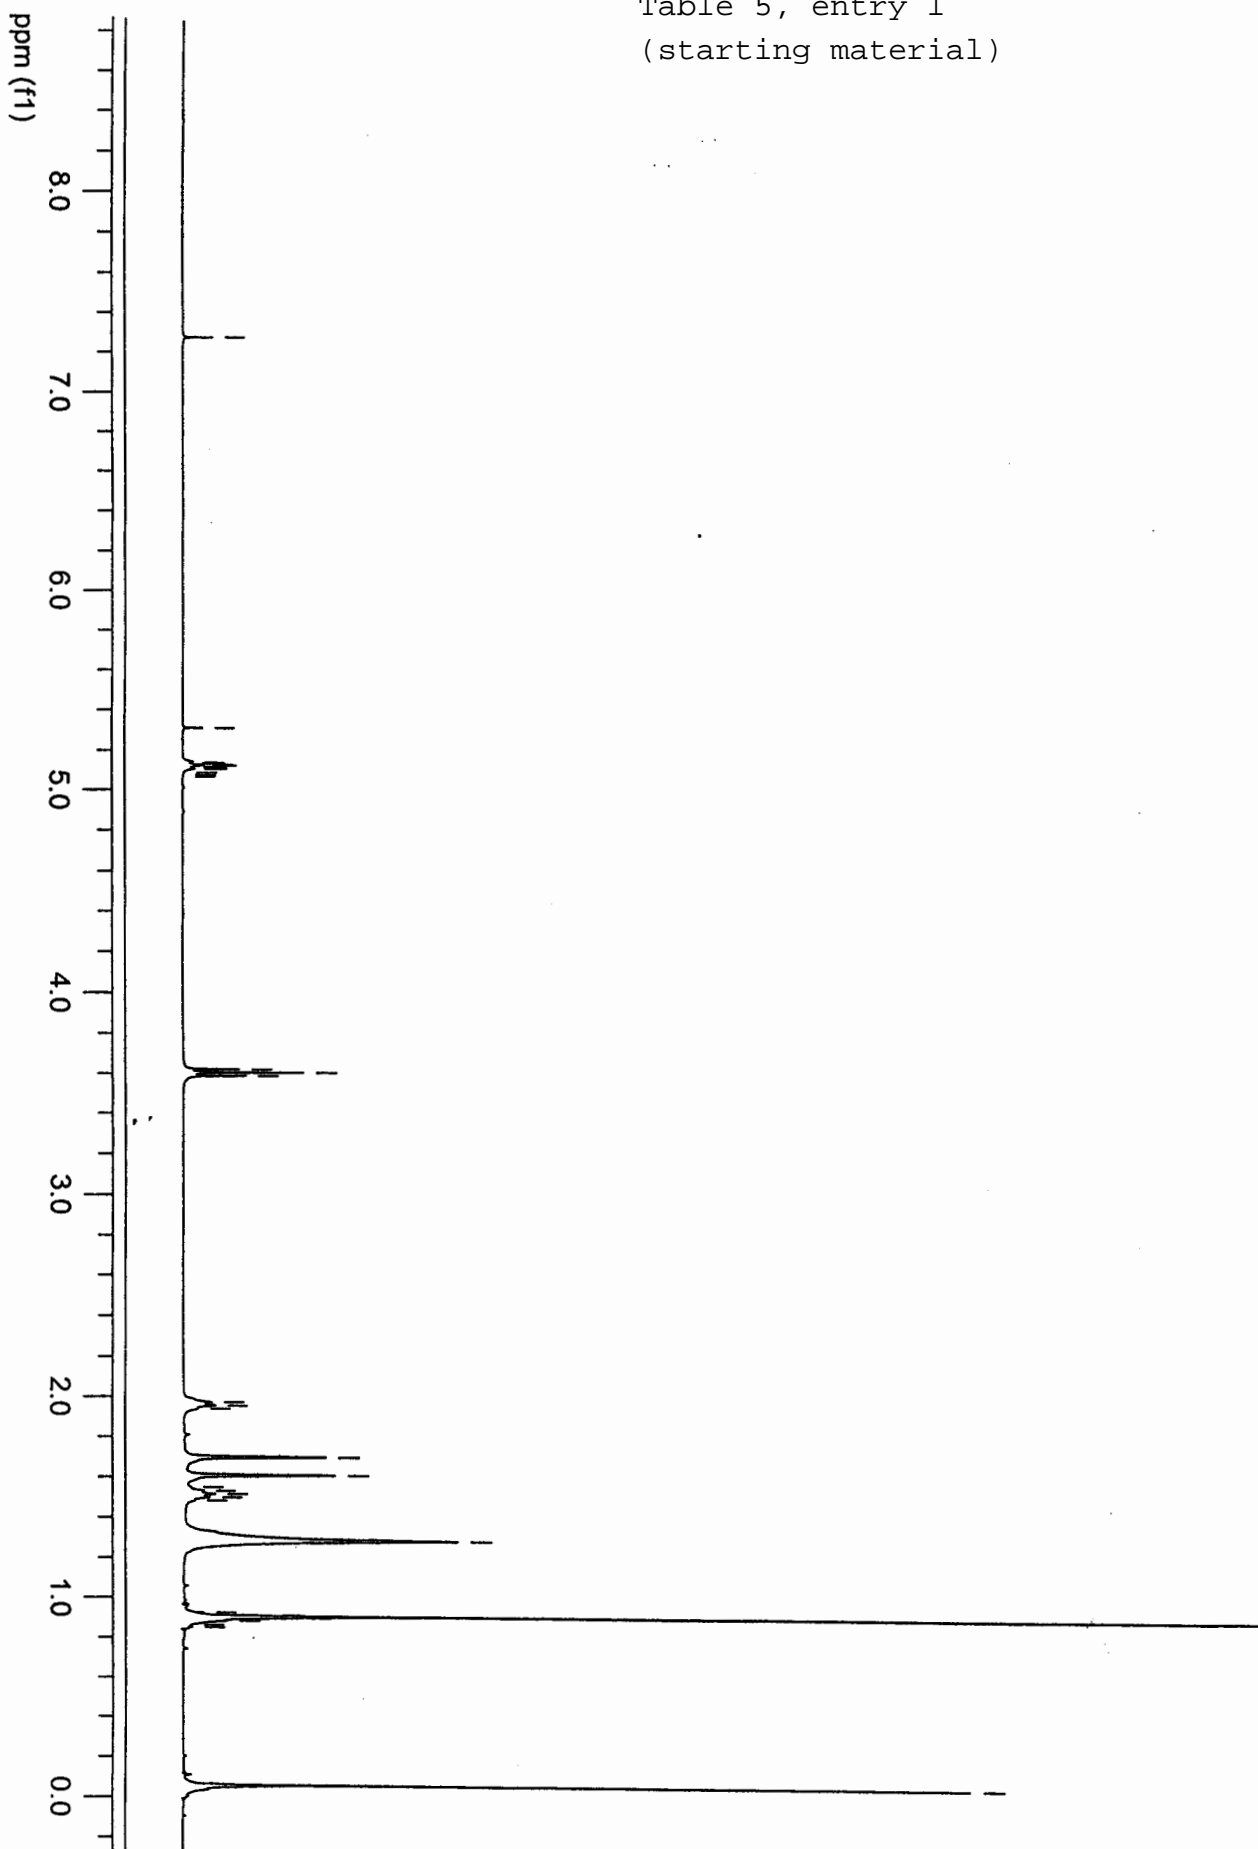



Table 5, entry 1  
(starting material)

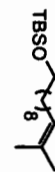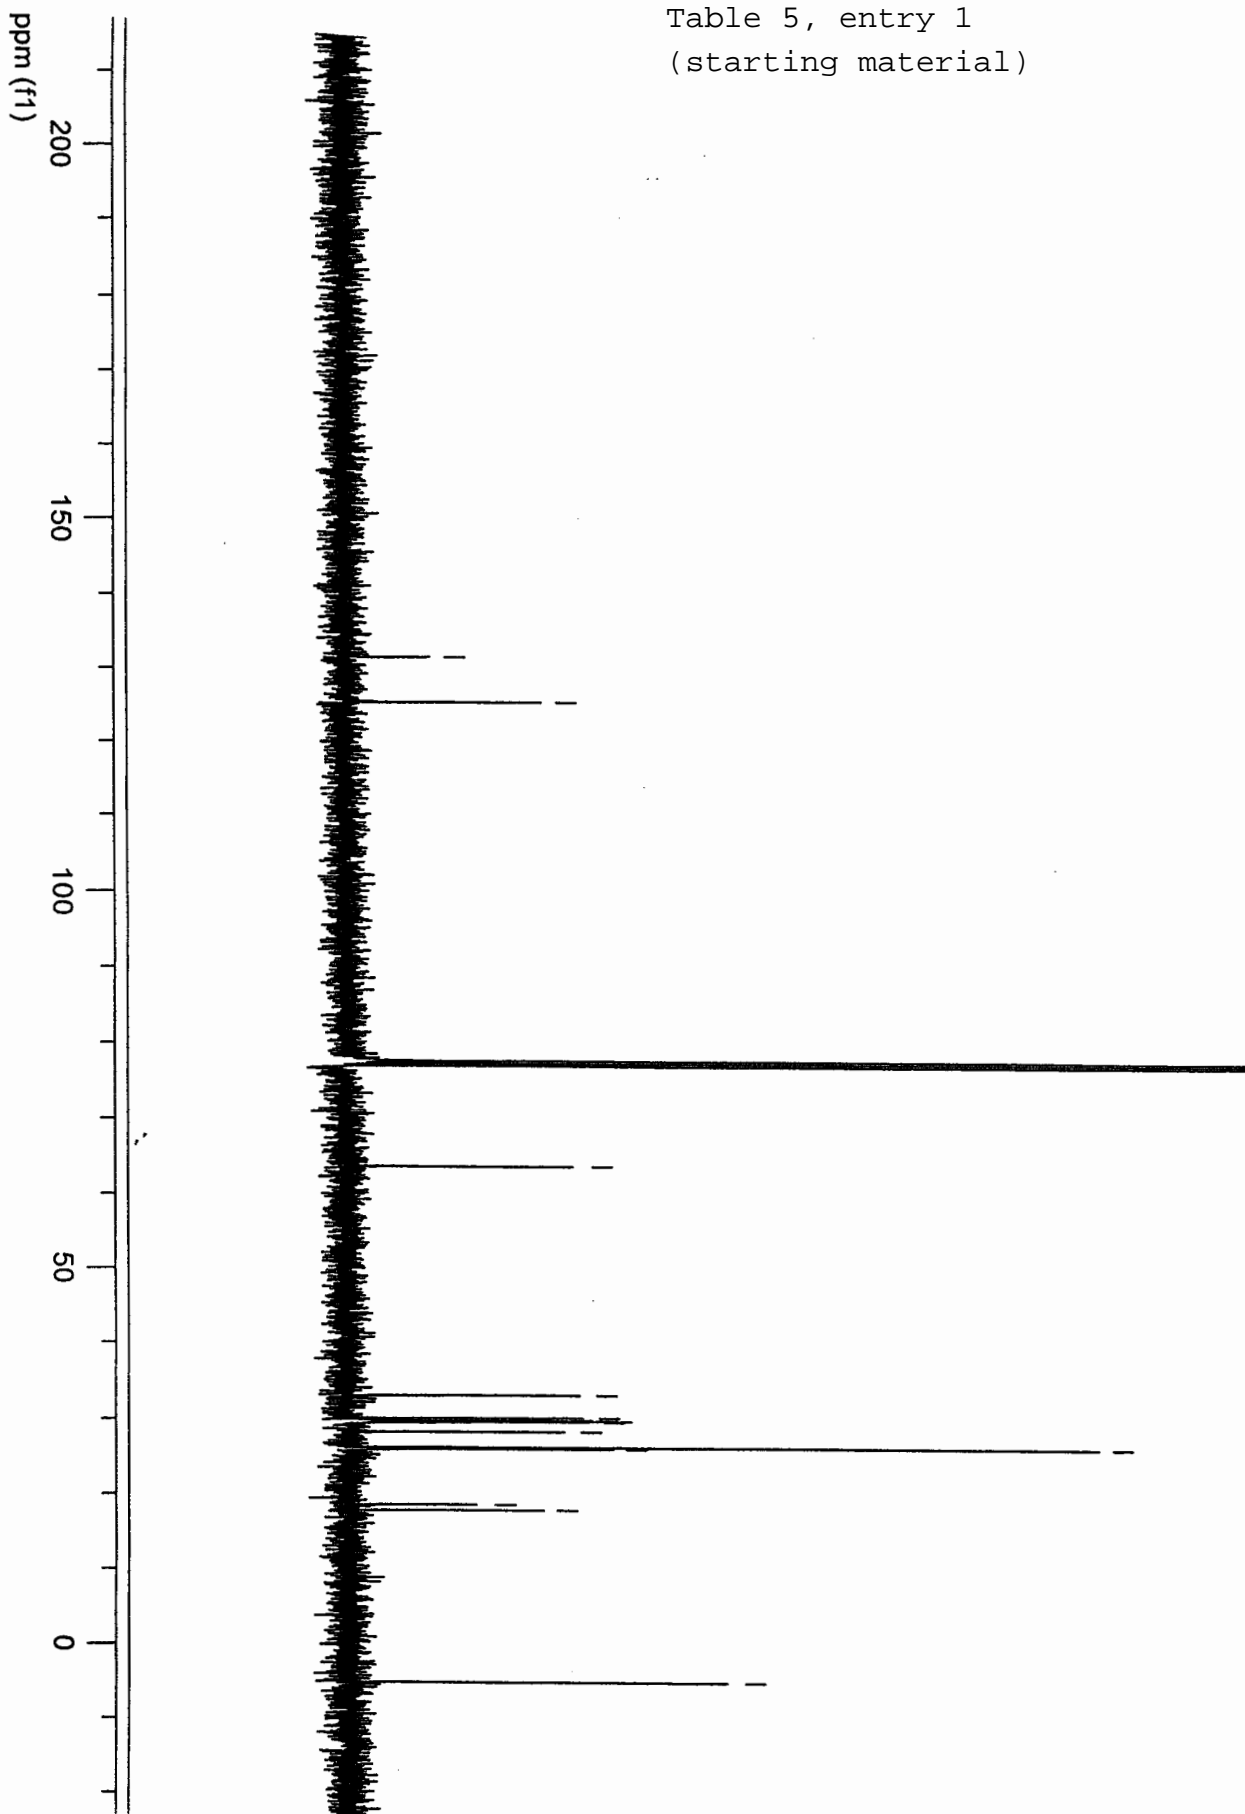

Table 5, entry 2  
(starting material)

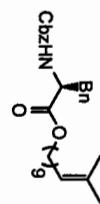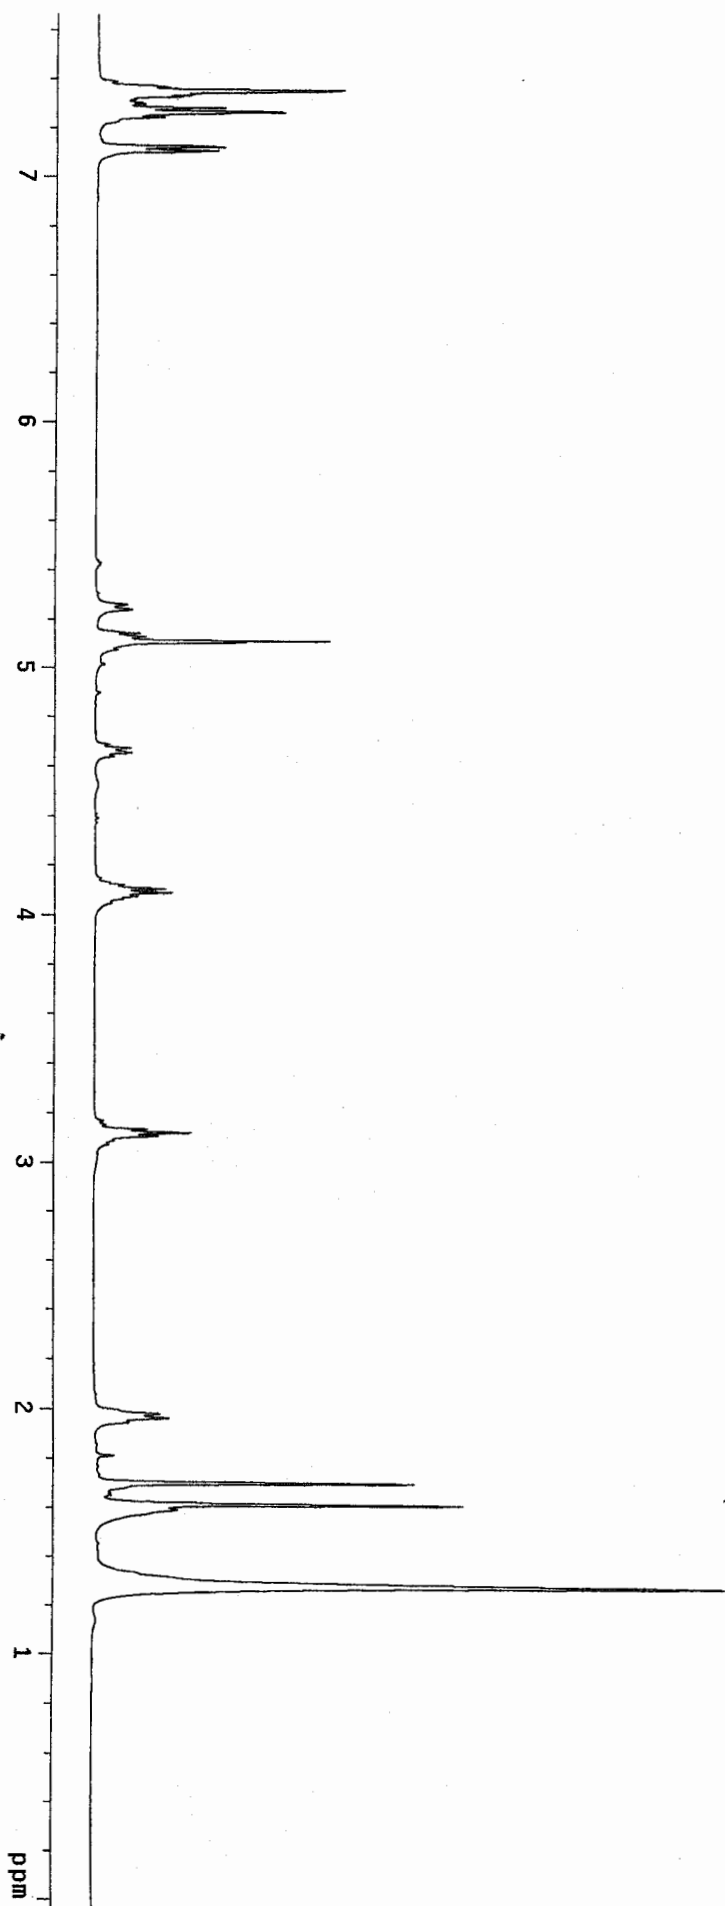

Table 5, entry 2  
(starting material)

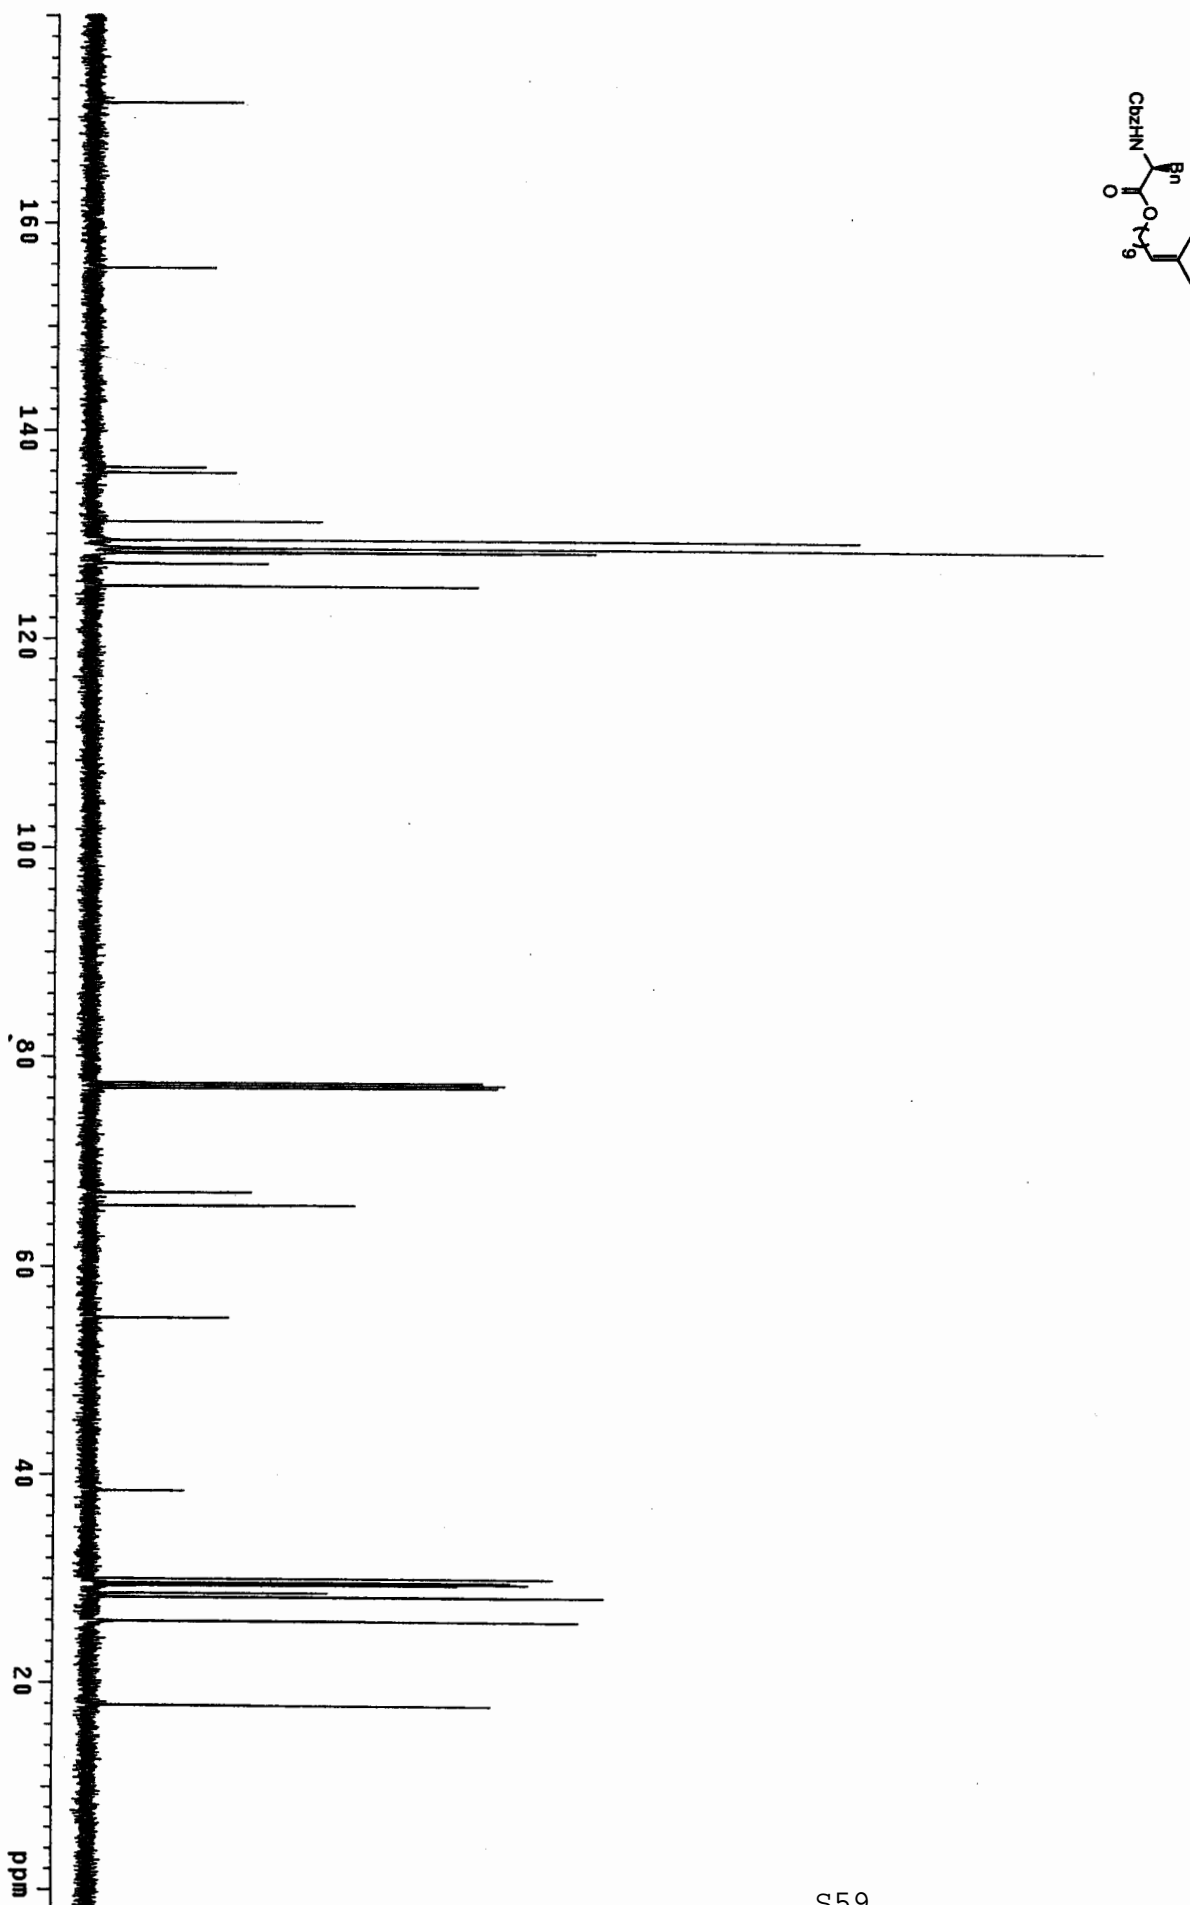

Table 5, entry 5  
(starting material)

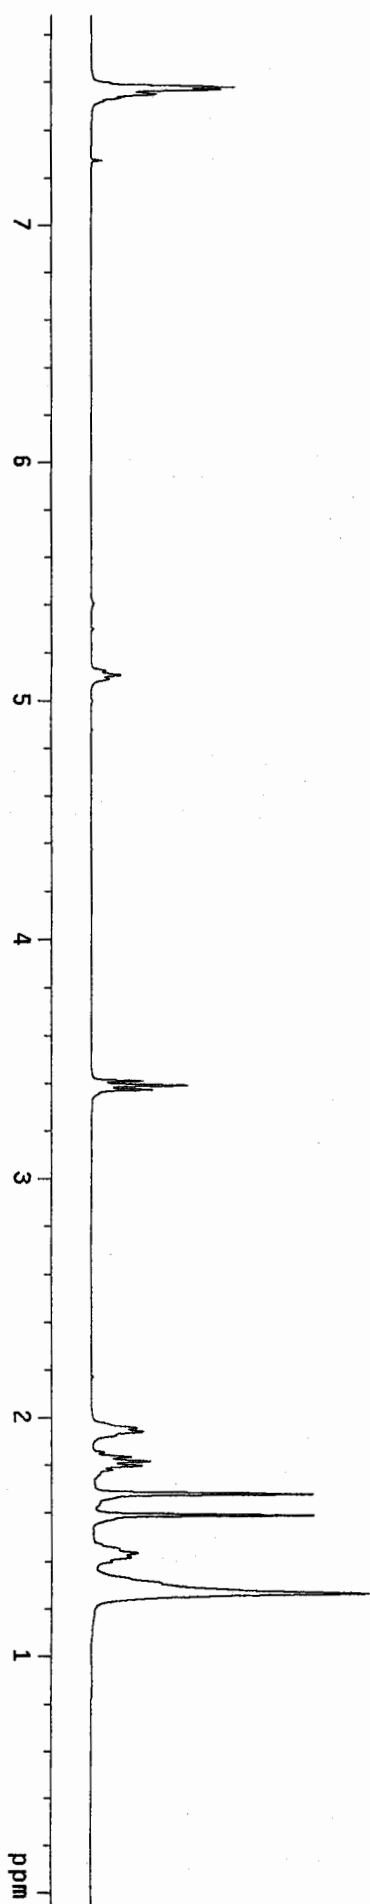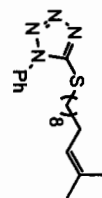

Table 5, entry 5  
(Starting material)

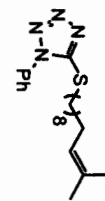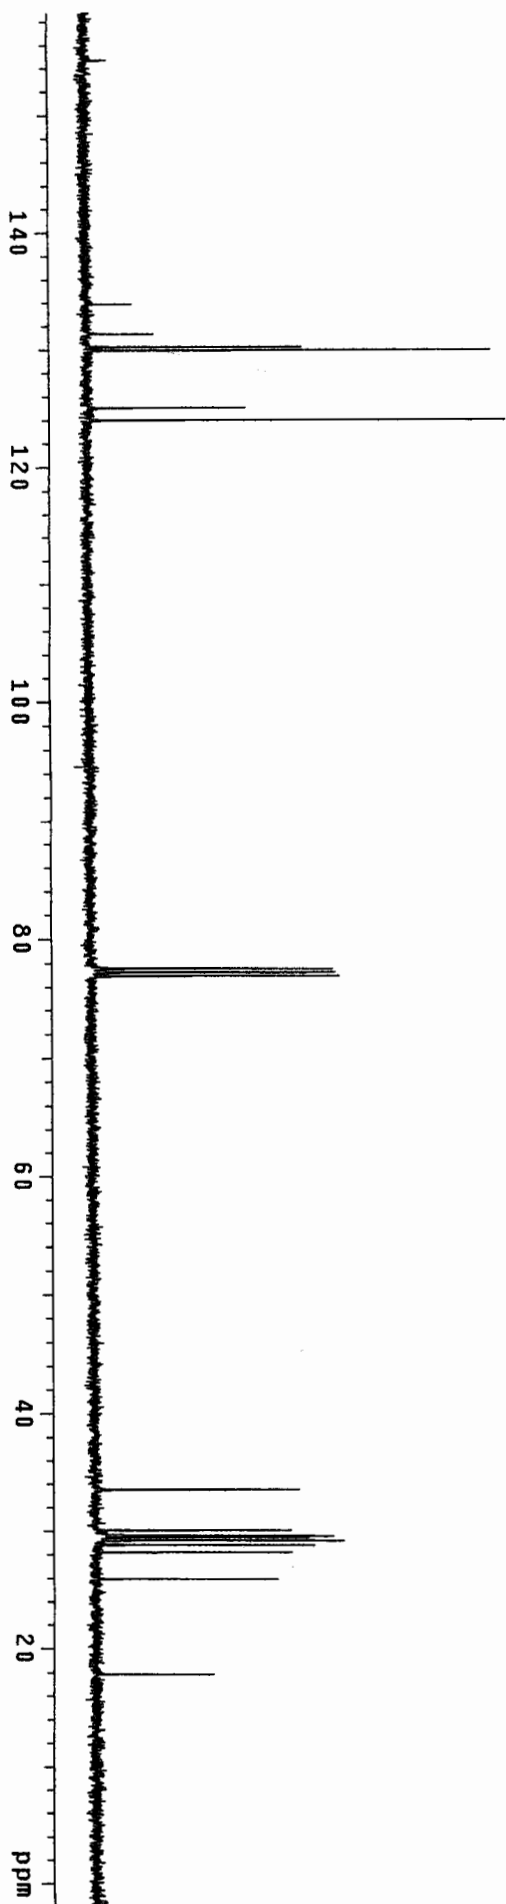

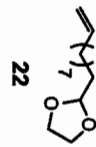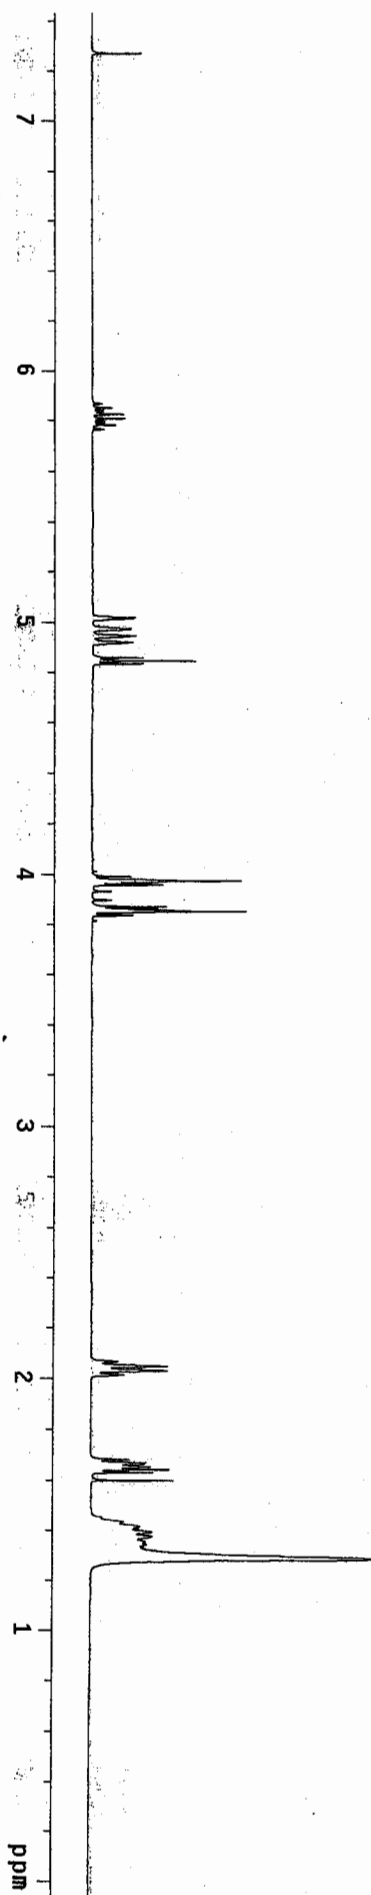

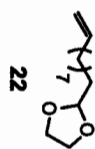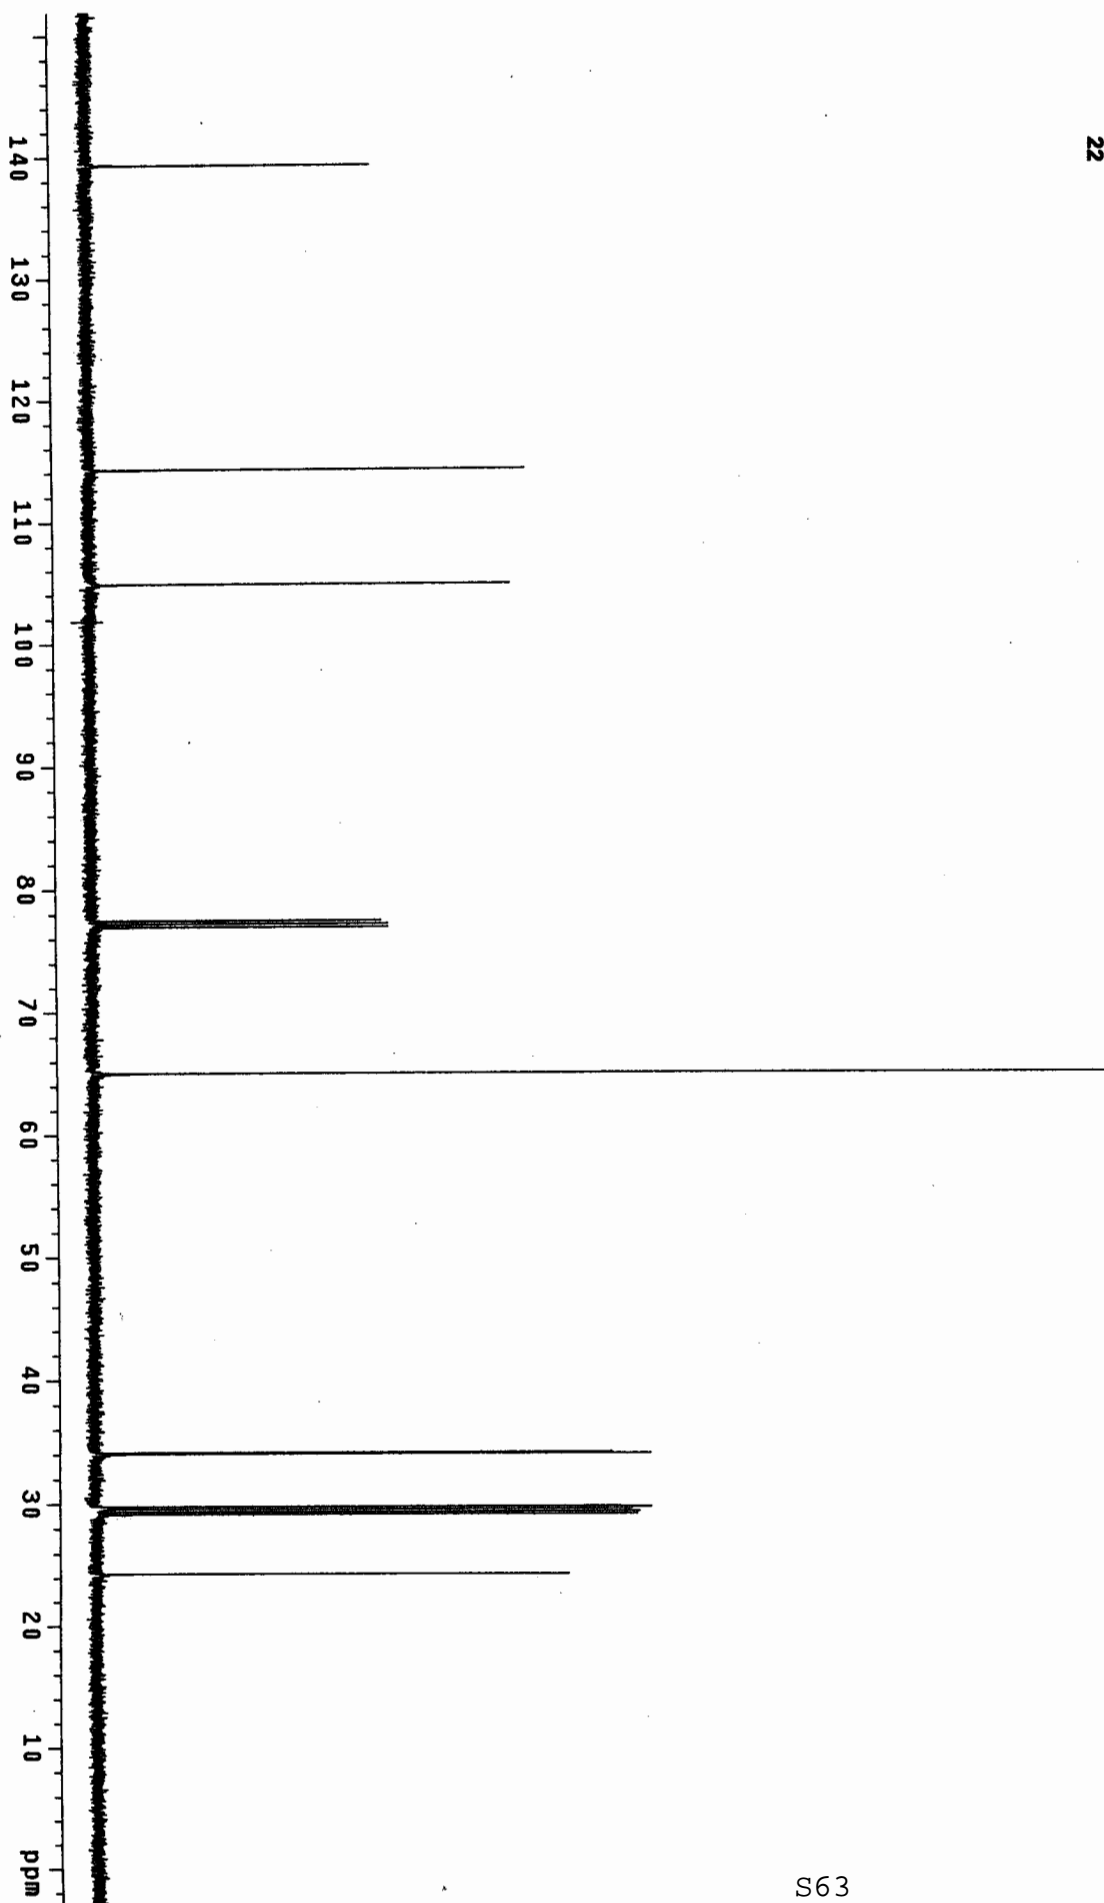

Supplement: NIHMS298140-supplement-1_si_001.pdf [file NIHMS298140-supplement-1_si_001.pdf]
